# Supplementary material for: FeCl3-catalyzed cyclization of α-sulfonamido-allenes with aldehydes—the substituent effect
Source: Royal Society of Chemistry journal article supplement (doi:10.1039/c2cc36941a), 2012-01-01
Supplement: c2cc36941a.pdf [file c2cc36941a.pdf]

# **FeCl<sub>3</sub>-Catalyzed Cyclization of $\alpha$ -Sulfonamido-Allenenes with Aldehydes-The Substituent Effect**

Jiajia Cheng, Xinjun Tang, Yihua Yu, and Shengming Ma\*

## **Supporting Information**

### **Index**

|                                                                                                        |     |
|--------------------------------------------------------------------------------------------------------|-----|
| 1. Typical Procedure and Analytical Data for Compounds <b>3a-3j</b>                                    | S2  |
| 2. Analytical Data for Compounds <b>4a-4h</b>                                                          | S11 |
| 3. Typical Procedure and Analytical Data for Compounds <b>6a-6c</b>                                    | S18 |
| 4. <sup>1</sup> H NMR, <sup>13</sup> C NMR, and <sup>19</sup> F NMR Spectra for Compounds <b>3a-6c</b> | S22 |
| 5. X-ray data for Compounds <b>3j</b> and <b>4a</b>                                                    | S68 |

(1) 4-Chloro-2-(1-naphthyl)-1-tosyl-1,2,3,6-tetrahydropyridine **3a** (cjj-6-30)

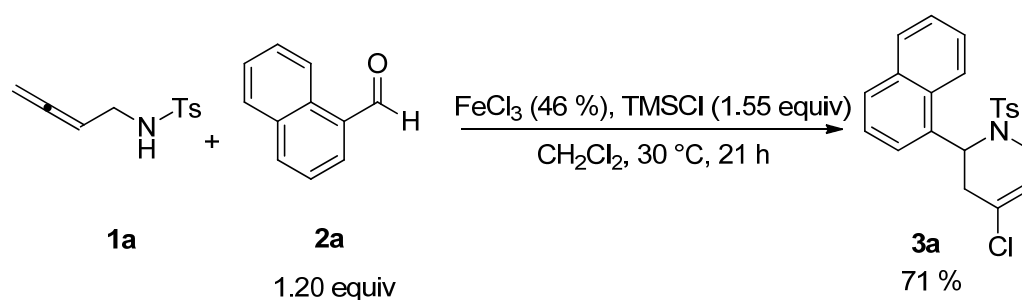

**Typical Procedure.** To a Schlenk tube were added FeCl<sub>3</sub> (14.9 mg, 0.092 mmol)/CH<sub>2</sub>Cl<sub>2</sub> (0.5 mL), *N*-(buta-2,3-dienyl)-4-tolylsulfonamide **1a** (45.7 mg, 0.20 mmol)/CH<sub>2</sub>Cl<sub>2</sub> (0.5 mL), 1-naphthaldehyde **2a** (37.1 mg, 0.24 mmol)/CH<sub>2</sub>Cl<sub>2</sub> (0.5 mL), and TMSCl (33.2 mg, 0.31 mmol)/CH<sub>2</sub>Cl<sub>2</sub> (0.5 mL) sequentially. Then the mixture was stirred at 30 °C for 21 h. After the reaction was complete as monitored by TLC (petroleum ether : ethyl acetate = 5 : 1), the resulting mixture was diluted with CH<sub>2</sub>Cl<sub>2</sub> (5 mL) and diethyl ether (10 mL). Then anhydrous MgSO<sub>4</sub> was added and the resulting mixture was then filtered through a short column of silica gel to remove the inorganic salts (eluent: 6× (5 mL of CH<sub>2</sub>Cl<sub>2</sub> + 10 mL Et<sub>2</sub>O)). After evaporation, the mixture was purified by column chromatography on silica gel (eluent: petroleum ether/ethyl acetate/CH<sub>2</sub>Cl<sub>2</sub> = 30/1/1) to afford 58.1 mg (71 %) of **3a**: white solid; m.p. 121-123 °C (CH<sub>2</sub>Cl<sub>2</sub>/petroleum ether); <sup>1</sup>H NMR (300 MHz, CDCl<sub>3</sub>) δ 8.60 (d, *J* = 8.4 Hz, 1 H, Ar-H), 7.86-7.70 (m, 4 H, Ar-H), 7.61 (t, *J* = 7.7 Hz, 1 H, Ar-H), 7.51 (t, *J* = 7.4 Hz, 1 H, Ar-H), 7.38-7.32 (m, 2 H), 7.24 (d, *J* = 8.1 Hz, 2 H, Ar-H), 6.14 (d, *J* = 7.2 Hz, 1 H, CH), 5.73-5.71 (m, 1 H, CH=), 4.04 (dd, *J* = 18.6, 4.2 Hz, 1 H, one proton of CH<sub>2</sub>), 3.22 (d, *J* = 18.6 Hz, 1 H, one proton of CH<sub>2</sub>), 2.92-2.78 (m, 1 H, one proton of CH<sub>2</sub>), 2.68-2.57 (m, 1 H, one proton of CH<sub>2</sub>), 2.41 (s, 3 H, CH<sub>3</sub> of Ts); <sup>13</sup>C

NMR (75 MHz, CDCl<sub>3</sub>) δ 143.9, 136.6, 134.0, 133.1, 131.4, 129.8, 129.6, 129.4, 128.7, 127.6, 126.8, 126.0, 124.6, 124.2, 124.1, 121.0, 51.0, 41.5, 34.1, 21.5; MS (EI) *m/z* (%) 399 (M<sup>+</sup>(<sup>37</sup>Cl), 2.80), 397 (M<sup>+</sup>(<sup>35</sup>Cl), 8.49), 91(100); IR (neat) 1662, 1597, 1511, 1494, 1440, 1339, 1245, 1156, 1091, 1053, 1034, 1019 cm<sup>-1</sup>; Anal Calcd for C<sub>22</sub>H<sub>20</sub>NO<sub>2</sub>SCl: C, 66.40; H, 5.07; N, 3.52. Found: C, 66.35; H, 5.38; N, 3.43. The structure of this compound was further conformed by the NOESY, HSQC and H-H COSY experiments.

The following compounds were prepared according to this procedure.

**(2) 4-Chloro-2-phenyl-1-tosyl-1,2,3,6-tetrahydropyridine 3b (cjj-6-41)**

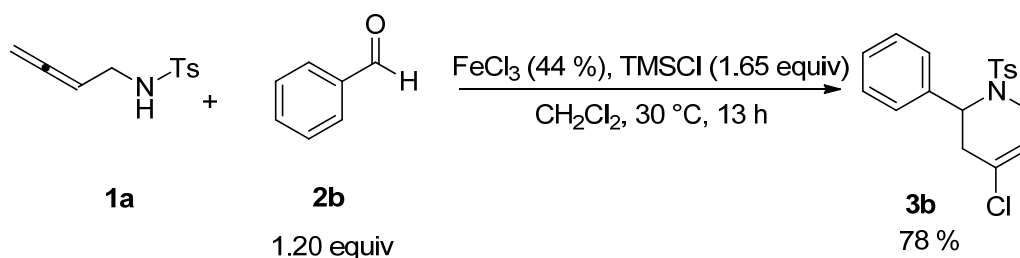

The reaction of FeCl<sub>3</sub> (14.3 mg, 0.088 mmol), *N*-(buta-2,3-dienyl)-4-tolylsulfonamide **1a** (45.1 mg, 0.20 mmol), benzaldehyde **2b** (25.6 mg, 0.24 mmol), and TMSCl (35.9 mg, 0.33 mmol) in CH<sub>2</sub>Cl<sub>2</sub> (2 mL) afforded 54.8 mg (78 %) of **3b** (eluent: petroleum ether/ethyl acetate/CH<sub>2</sub>Cl<sub>2</sub> = 30/1/1): white solid; m.p. 117-119 °C (CH<sub>2</sub>Cl<sub>2</sub>/petroleum ether); <sup>1</sup>H NMR (300 MHz, CDCl<sub>3</sub>) δ 7.70 (d, *J* = 8.1 Hz, 2 H, Ar-H), 7.34-7.24 (m, 7 H, Ar-H), 5.72-5.67 (m, 1 H, CH=), 5.34 (t, *J* = 3.9 Hz, 1 H, ArCHNTs), 4.19 (dd, *J* = 18.5, 4.7 Hz, 1 H, one proton of CH<sub>2</sub>), 3.42-3.30 (m, 1 H, one proton of CH<sub>2</sub>), 2.66-2.57 (m, 2 H, CH<sub>2</sub>), 2.43 (s, 3 H, CH<sub>3</sub> of Ts); <sup>13</sup>C NMR (75

MHz, CDCl<sub>3</sub>) δ 143.6, 137.8, 137.3, 129.7, 129.0, 128.6, 127.9, 127.1, 127.0, 120.8, 53.8, 41.3, 33.6, 21.5; MS (EI) *m/z* (%) 349 (M<sup>+</sup>(<sup>37</sup>Cl), 1.52), 347 (M<sup>+</sup>(<sup>35</sup>Cl), 4.02), 91(100); IR (neat) 1662, 1595, 1493, 1448, 1400, 1344, 1321, 1304, 1252, 1206, 1159, 1118, 1094, 1063, 1044, 1016, 1003 cm<sup>-1</sup>; Anal Calcd for C<sub>18</sub>H<sub>18</sub>NO<sub>2</sub>SCl: C, 62.15; H, 5.22; N, 4.03. Found: C, 62.06; H, 5.28; N, 3.89.

**(3) 4-Chloro-2-(2-chlorophenyl)-1-tosyl-1,2,3,6-tetrahydropyridine 3c (cjj-6-42)**

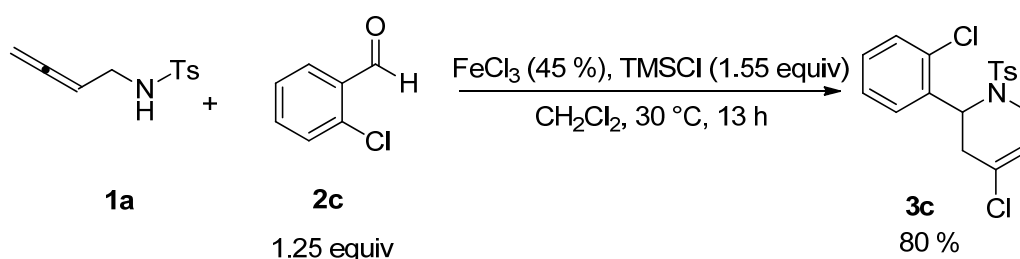

The reaction of FeCl<sub>3</sub> (14.5 mg, 0.089 mmol), *N*-(buta-2,3-dienyl)-4-tolylsulfonamide **1a** (45.2 mg, 0.20 mmol), 2-chlorobenzaldehyde **2c** (35.1 mg, 0.25 mmol), and TMSCl (33.2 mg, 0.31 mmol) in CH<sub>2</sub>Cl<sub>2</sub> (2 mL) afforded 62.1 mg (80 %) of **3c** (eluent: petroleum ether/ethyl acetate/CH<sub>2</sub>Cl<sub>2</sub> = 30/1/1): oil; <sup>1</sup>H NMR (300 MHz, CDCl<sub>3</sub>) δ 7.66 (d, *J* = 8.1 Hz, 2 H, Ar-H), 7.36 (dd, *J* = 7.8, 0.9 Hz, 1 H, Ar-H), 7.24-7.01 (m, 5 H, Ar-H), 5.87-5.83 (m, 1 H, CH=), 5.79 (d, *J* = 6.9 Hz, 1 H, ArCHNTs), 4.23-4.11 (m, 1 H, one proton of CH<sub>2</sub>), 3.65-3.55 (m, 1 H, one proton of CH<sub>2</sub>), 3.05-2.85 (m, 1 H, one proton of CH<sub>2</sub>), 2.52-2.41 (m, 1 H, one proton of CH<sub>2</sub>), 2.39 (s, 3 H, CH<sub>3</sub> of Ts); <sup>13</sup>C NMR (75 MHz, CDCl<sub>3</sub>) δ 143.6, 136.8, 136.2, 133.7, 130.2, 129.5, 129.2, 129.1, 127.5, 127.4, 126.8, 120.6, 51.6, 42.4, 35.6, 21.5; MS (EI) *m/z* (%) 383 (M<sup>+</sup>(<sup>35</sup>Cl<sup>37</sup>Cl), 1.30), 381 (M<sup>+</sup>(<sup>35</sup>Cl<sup>35</sup>Cl), 2.47), 91(100); IR (neat) 3066, 2923, 2855, 1666, 1597, 1494, 1474, 1443, 1346, 1305, 1289, 1163, 1092, 1075, 1040,

1018  $\text{cm}^{-1}$ ; HRMS (EI) calcd for  $\text{C}_{18}\text{H}_{17}\text{NO}_2\text{S}^{35}\text{Cl}^{35}\text{Cl}$  ( $\text{M}^+$ ): 381.0357. Found: 381.0360.

**(4) 4-Chloro-2-(4-nitrophenyl)-1-tosyl-1,2,3,6-tetrahydropyridine 3d (cjj-6-34)**

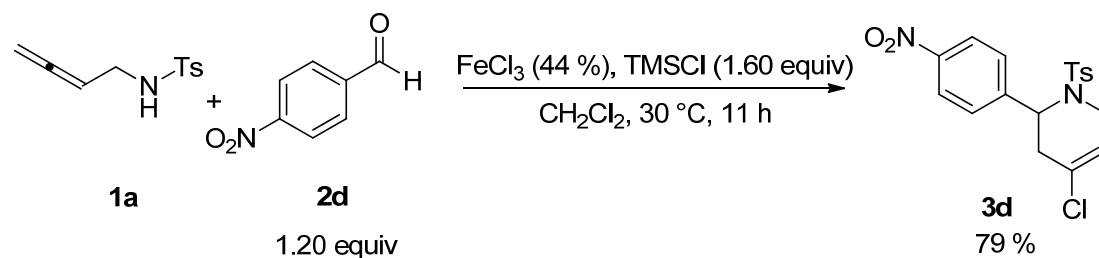

The reaction of FeCl<sub>3</sub> (14.3 mg, 0.088 mmol), *N*-(buta-2,3-dienyl)-4-tolylsulfonamide **1a** (45.2 mg, 0.20 mmol), 4-nitrobenzaldehyde **2d** (36.4 mg, 0.24 mmol), and TMSCl (35.1 mg, 0.32 mmol) in CH<sub>2</sub>Cl<sub>2</sub> (2 mL) afforded 62.7 mg (79 %) of **3d** (eluent: petroleum ether/ethyl acetate/CH<sub>2</sub>Cl<sub>2</sub> = 20/1/1): oil; <sup>1</sup>H NMR (300 MHz, CDCl<sub>3</sub>)  $\delta$  8.18 (d,  $J$  = 8.7 Hz, 2 H, Ar-H), 7.71 (d,  $J$  = 8.1 Hz, 2 H, Ar-H), 7.51 (d,  $J$  = 8.7 Hz, 2 H, Ar-H), 7.32 (d,  $J$  = 8.4 Hz, 2 H, Ar-H), 5.76-5.70 (m, 1 H, CH=), 5.42 (d,  $J$  = 4.8 Hz, 1 H, ArCHNTs), 4.29-4.17 (m, 1 H, one proton of CH<sub>2</sub>), 3.43-3.31 (m, 1 H, one proton of CH<sub>2</sub>), 2.78-2.56 (m, 2 H, CH<sub>2</sub>), 2.45 (s, 3 H, CH<sub>3</sub> of Ts); <sup>13</sup>C NMR (75 MHz, CDCl<sub>3</sub>)  $\delta$  147.5, 145.2, 144.1, 136.8, 130.0, 128.3, 128.2, 126.9, 123.9, 120.8, 53.3, 41.4, 33.4, 21.5; MS (EI)  $m/z$  (%) 394 ( $\text{M}^+$ (<sup>37</sup>Cl), 0.63), 392 ( $\text{M}^+$ (<sup>35</sup>Cl), 1.56), 91(100); IR (neat) 1664, 1596, 1515, 1491, 1444, 1348, 1294, 1248, 1207, 1179, 1155, 1097, 1068, 1045, 1017  $\text{cm}^{-1}$ ; HRMS (EI) calcd for  $\text{C}_{18}\text{H}_{17}\text{N}_2\text{O}_4\text{S}^{35}\text{Cl}$  ( $\text{M}^+$ ): 392.0598. Found: 392.0593.

**(5) 2-(2-Bromophenyl)-4-chloro-1-tosyl-1,2,3,6-tetrahydropyridine 3e (cjj-6-36)**

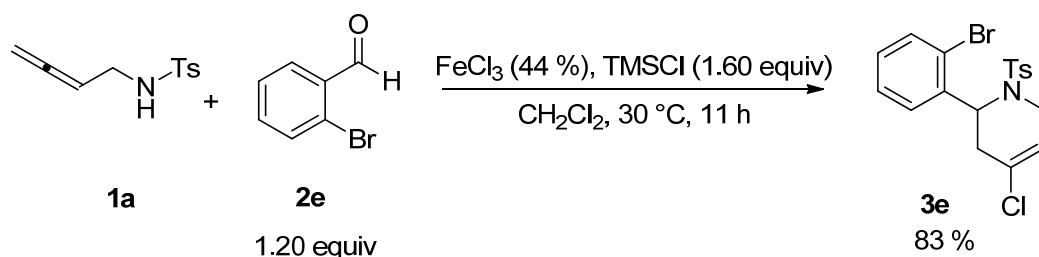

The reaction of  $\text{FeCl}_3$  (14.2 mg, 0.088 mmol), *N*-(buta-2,3-dienyl)-4-tolylsulfonamide **1a** (45.3 mg, 0.20 mmol), 2-bromobenzaldehyde **2e** (45.1 mg, 0.24 mmol), and TMSCl (35.0 mg, 0.32 mmol) in  $\text{CH}_2\text{Cl}_2$  (2 mL) afforded 72.2 mg (83 %) of **3e** (eluent: petroleum ether/ethyl acetate/ $\text{CH}_2\text{Cl}_2$  = 30/1/1): oil;  $^1\text{H}$  NMR (300 MHz,  $\text{CDCl}_3$ )  $\delta$  7.63 (d,  $J$  = 8.4 Hz, 2 H, Ar-H), 7.58-7.52 (m, 1 H, Ar-H), 7.18 (d,  $J$  = 8.4 Hz, 2 H, Ar-H), 7.14-7.05 (m, 3 H, Ar-H), 5.90-5.83 (m, 1 H, CH=), 5.74 (d,  $J$  = 6.3 Hz, 1 H, ArCHNTs), 4.24-4.15 (m, 1 H, one proton of  $\text{CH}_2$ ), 3.77-3.64 (m, 1 H, one proton of  $\text{CH}_2$ ), 3.05-2.90 (m, 1 H, one proton of  $\text{CH}_2$ ), 2.50 (d,  $J$  = 17.7 Hz, 1 H, one proton of  $\text{CH}_2$ ), 2.38 (s, 3 H,  $\text{CH}_3$  of Ts);  $^{13}\text{C}$  NMR (75 MHz,  $\text{CDCl}_3$ )  $\delta$  143.5, 138.6, 136.0, 133.5, 129.4, 129.3, 128.8, 127.6, 127.4, 127.3, 123.8, 120.4, 54.1, 42.8, 36.0, 21.4; MS (EI)  $m/z$  (%) 429 ( $\text{M}^+(\text{}^{37}\text{Cl}^{81}\text{Br})$ , 0.70), 427 ( $\text{M}^+(\text{}^{35}\text{Cl}^{81}\text{Br} + \text{}^{37}\text{Cl}^{79}\text{Br})$ , 2.13), 425 ( $\text{M}^+(\text{}^{35}\text{Cl}^{79}\text{Br})$ , 1.60), 91(100); IR (neat) 3065, 2923, 1675, 1596, 1494, 1469, 1440, 1344, 1305, 1291, 1277, 1261, 1163, 1121, 1055, 1026  $\text{cm}^{-1}$ ; HRMS (EI) calcd for  $\text{C}_{18}\text{H}_{17}\text{NO}_2\text{S}^{35}\text{Cl}^{79}\text{Br}$  ( $\text{M}^+$ ): 424.9852. Found: 424.9855.

**(6) 4-Chloro-2-heptyl-1-tosyl-1,2,3,6-tetrahydropyridine 3f (cjj-6-49)**

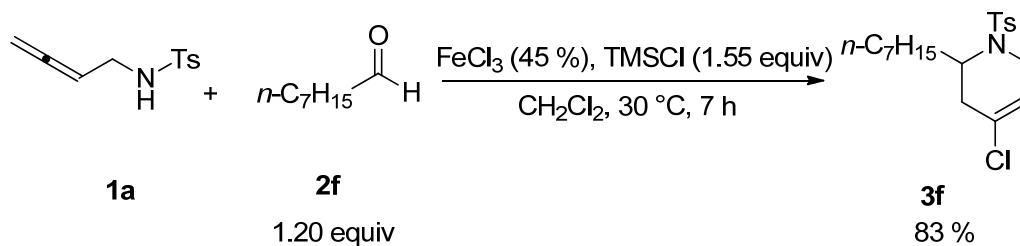

The reaction of  $\text{FeCl}_3$  (14.6 mg, 0.090 mmol), *N*-(buta-2,3-dienyl)-4-tolylsulfonamide **1a** (45.2 mg, 0.20 mmol), octanal **2f** (31.3 mg, 0.24 mmol), and TMSCl (33.7 mg, 0.31 mmol) in  $\text{CH}_2\text{Cl}_2$  (2 mL) afforded 62.1 mg (83 %) of **3f** (eluent: petroleum ether/ethyl acetate/ $\text{CH}_2\text{Cl}_2 = 30/1/1$ ): oil;  $^1\text{H}$  NMR (300 MHz,  $\text{CDCl}_3$ )  $\delta$  7.67 (d,  $J = 8.4$  Hz, 2 H, Ar-H), 7.27 (d,  $J = 8.1$  Hz, 2 H, Ar-H), 5.72-5.68 (m, 1 H, CH=), 4.30-4.17 (m, 1 H, one proton of  $\text{CH}_2$ ), 4.09 (q,  $J = 6.9$  Hz, 1 H, CH), 3.67-3.54 (m, 1 H, one proton of  $\text{CH}_2$ ), 2.50-2.35 (m, 4 H,  $\text{CH}_3$  of Ts + one proton of  $\text{CH}_2$ ), 1.97 (d,  $J = 17.4$  Hz, 1 H, one proton of  $\text{CH}_2$ ), 1.58-1.05 (m, 12 H,  $\text{C}_6\text{H}_{12}$ ), 0.88 (t,  $J = 6.8$  Hz, 3 H,  $\text{CH}_3$ );  $^{13}\text{C}$  NMR (75 MHz,  $\text{CDCl}_3$ )  $\delta$  143.4, 137.5, 129.6, 129.1, 126.9, 119.4, 51.6, 40.8, 35.6, 31.7, 31.1, 29.11, 29.06, 26.1, 22.6, 21.4, 14.0; MS (EI)  $m/z$  (%) 369 ( $\text{M}^+(\text{Cl})$ , 0.15), 272 ( $\text{M}^+ - \text{C}_7\text{H}_{15}$  ( $^{37}\text{Cl}$ ), 17.62), 270 ( $\text{M}^+ - \text{C}_7\text{H}_{15}$  ( $^{35}\text{Cl}$ ), 45.31), 91(100); IR (neat) 3065, 2927, 2856, 1735, 1686, 1596, 1494, 1459, 1378, 1351, 1306, 1162, 1120, 1092, 1067, 1018  $\text{cm}^{-1}$ ; Anal Calcd for  $\text{C}_{19}\text{H}_{28}\text{NO}_2\text{S}$ : C, 61.69; H, 7.63; N, 3.79. Found: C, 61.41; H, 7.41; N, 3.78.

(7) 4-Chloro-2-phenethyl-1-tosyl-1,2,3,6-tetrahydropyridine **3g** (cjj-6-45)

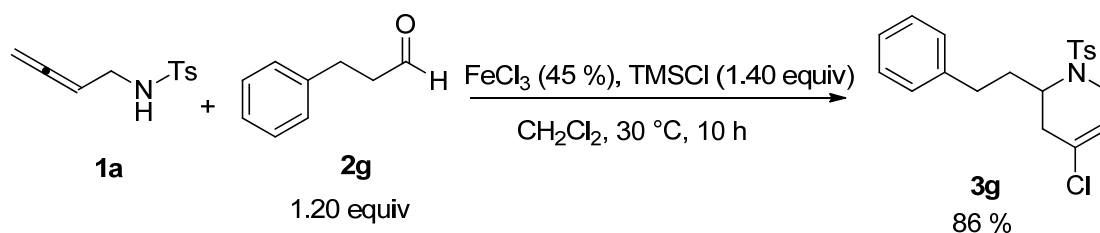

The reaction of FeCl<sub>3</sub> (14.4 mg, 0.089 mmol), *N*-(buta-2,3-dienyl)-4-tolylsulfonamide **1a** (45.7 mg, 0.20 mmol), hydrocinnamaldehyde **2g** (32.8 mg, 0.24 mmol), and TMSCl (30.9 mg, 0.28 mmol) in CH<sub>2</sub>Cl<sub>2</sub> (2 mL) afforded 66.1 mg (86 %) of **3g** (eluent: petroleum ether/ethyl acetate/CH<sub>2</sub>Cl<sub>2</sub> = 30/1/1): oil; <sup>1</sup>H NMR (300 MHz, CDCl<sub>3</sub>) δ 7.66 (d, *J* = 8.4 Hz, 2 H, Ar-H), 7.32-7.24 (m, 4 H, Ar-H), 7.24-7.10 (m, 3 H, Ar-H), 5.73-5.68 (m, 1 H, CH=), 4.28 (dt, *J* = 18.6, 3.6 Hz, 1 H, one proton of CH<sub>2</sub>), 4.17 (q, *J* = 7.1 Hz, 1 H, CH), 3.72-3.59 (m, 1 H, one proton of CH<sub>2</sub>), 2.64 (t, *J* = 8.0 Hz, 2 H, CH<sub>2</sub>), 2.48-2.34 (m, 4 H, CH<sub>3</sub> of Ts + one proton of CH<sub>2</sub>), 1.99 (d, *J* = 17.4 Hz, 1 H, one proton of CH<sub>2</sub>), 1.88-1.62 (m, 2 H, CH<sub>2</sub>); <sup>13</sup>C NMR (75 MHz, CDCl<sub>3</sub>) δ 143.5, 141.0, 137.2, 129.7, 128.9, 128.4, 128.3, 126.8, 126.0, 119.4, 51.3, 40.8, 35.5, 33.1, 32.3, 21.4; MS (EI) *m/z* (%) 375 (M<sup>+</sup>(<sup>35</sup>Cl), 0.28), 272 (M<sup>+</sup>(<sup>37</sup>Cl)-C<sub>8</sub>H<sub>9</sub>, 7.71), 270 (M<sup>+</sup>(<sup>35</sup>Cl)-C<sub>8</sub>H<sub>9</sub>, 22.78), 91(100); IR (neat) 1665, 1597, 1495, 1454, 1380, 1332, 1305, 1290, 1245, 1156, 1097, 1048, 1017 cm<sup>-1</sup>; Anal Calcd for C<sub>20</sub>H<sub>22</sub>NO<sub>2</sub>SCl: C, 63.90; H, 5.90; N, 3.73. Found: C, 63.83; H, 5.96; N, 3.81.

**(8) 4-Chloro-2-cyclohexyl-1-tosyl-1,2,3,6-tetrahydropyridine 3h (cjj-12-50)**

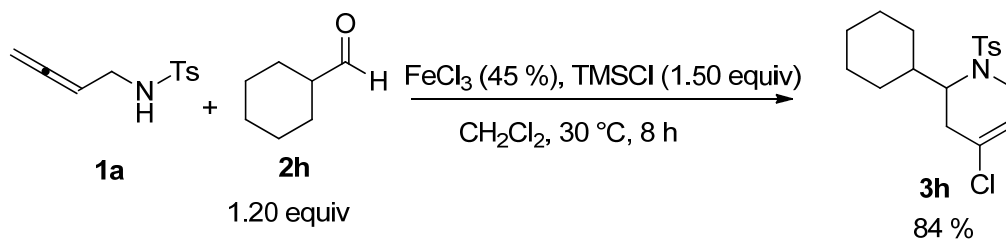

The reaction of FeCl<sub>3</sub> (14.6 mg, 0.090 mmol), *N*-(buta-2,3-dienyl)-4-tolylsulfonamide **1a** (44.7 mg, 0.20 mmol), cyclohexylcarboxaldehyde **2h** (33.7 mg, 0.30 mmol),



and TMSCl (32.6 mg, 0.30 mmol) in CH<sub>2</sub>Cl<sub>2</sub> (2 mL) afforded 59.5 mg (84 %) of **3h** (eluent: petroleum ether/ethyl acetate/CH<sub>2</sub>Cl<sub>2</sub> = 30/1/1): oil; <sup>1</sup>H NMR (300 MHz, CDCl<sub>3</sub>) δ 7.66 (d, *J* = 8.4 Hz, 2 H, Ar-H), 7.27 (d, *J* = 8.4 Hz, 2 H, Ar-H), 5.69-5.66 (m, 1 H, CH=), 4.27-4.17 (m, 1 H, one proton of CH<sub>2</sub>), 3.80-3.70 (m, 1 H, CH), 3.68-3.56 (m, 1 H, one proton of CH<sub>2</sub>), 2.42 (s, 3 H, CH<sub>3</sub> of Ts), 2.27-2.05 (m, 2 H, CH<sub>2</sub>), 1.87-1.60 (m, 5 H, 5 protons in *c*-hexyl group), 1.50-1.35 (m, 1 H, one proton in *c*-hexyl group), 1.35-0.83 (m, 5 H, 5 protons in *c*-hexyl group); <sup>13</sup>C NMR (75 MHz, CDCl<sub>3</sub>) δ 143.3, 137.8, 129.6, 128.9, 126.7, 119.6, 56.7, 41.4, 37.1, 32.0, 30.7, 29.9, 26.1, 25.9, 25.8, 21.5; MS (EI) *m/z* (%) 272 (M<sup>+</sup>(<sup>37</sup>Cl)-C<sub>6</sub>H<sub>11</sub>, 37.23), 270 (M<sup>+</sup>(<sup>35</sup>Cl)-C<sub>6</sub>H<sub>11</sub>, 100); IR (neat) 2962, 2853, 1669, 1597, 1495, 1449, 1412, 1349, 1259, 1163, 1013 cm<sup>-1</sup>; Anal Calcd for C<sub>18</sub>H<sub>24</sub>NO<sub>2</sub>SCl: C, 61.09; H, 6.84; N, 3.96. Found: C, 61.15; H, 6.84; N, 3.98.

**(9) 2-(*tert*-Butyl)-4-chloro-1-tosyl-1,2,3,6-tetrahydropyridine 3i (cjj-6-48)**

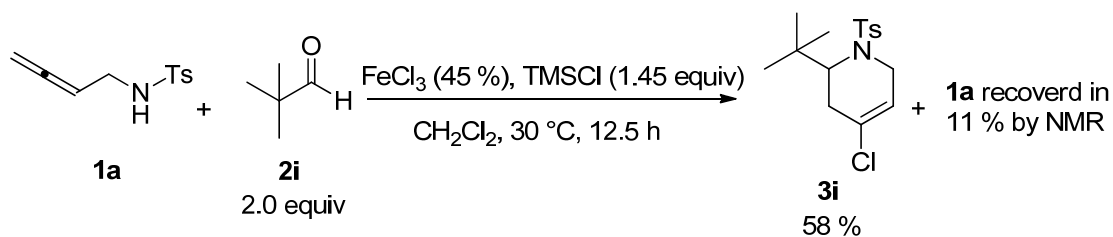

The reaction of FeCl<sub>3</sub> (14.5 mg, 0.089 mmol), *N*-(buta-2,3-dienyl)-4-tolylsulfonamide **1a** (45.3 mg, 0.20 mmol), pivaldehyde **2i** (34.1 mg, 0.40 mmol), and TMSCl (31.0 mg, 0.29 mmol) in CH<sub>2</sub>Cl<sub>2</sub> (2 mL) afforded 38.7 mg (58 %) of **3i** (eluent: petroleum ether/ethyl acetate/CH<sub>2</sub>Cl<sub>2</sub> = 30/1/1): white solid; m.p. 132-134 °C (CH<sub>2</sub>Cl<sub>2</sub>/petroleum ether); <sup>1</sup>H NMR (300 MHz, CDCl<sub>3</sub>) δ 7.65 (d, *J* = 8.4 Hz, 2 H,

Ar-H), 7.27 (d,  $J = 7.8$  Hz, 2 H, Ar-H), 5.65-5.60 (m, 1 H, CH=), 4.30-4.25 (m, 1 H, one proton of CH<sub>2</sub>), 3.91-3.75 (m, 3 H, one proton of CH<sub>2</sub> + CH), 2.42 (s, 3 H, CH<sub>3</sub> of Ts), 2.17-2.08 (m, 2 H, CH<sub>2</sub>), 0.99 (s, 9 H, C<sub>3</sub>H<sub>9</sub>); <sup>13</sup>C NMR (75 MHz, CDCl<sub>3</sub>)  $\delta$  143.3, 137.3, 129.8, 129.7, 126.7, 119.2, 58.8, 43.1, 36.3, 30.5, 27.7, 21.5; MS (EI)  $m/z$  (%) 314 (M<sup>+</sup>(<sup>37</sup>Cl)-CH<sub>3</sub>, 0.50), 312 (M<sup>+</sup>(<sup>35</sup>Cl)-CH<sub>3</sub>, 1.22), 270 (100); IR (neat) 2963, 1682, 1595, 1493, 1470, 1399, 1384, 1370, 1358, 1326, 1290, 1259, 1223, 1205, 1185, 1153, 1097, 1075, 1056, 1009 cm<sup>-1</sup>; Anal Calcd for C<sub>16</sub>H<sub>22</sub>NO<sub>2</sub>SCl: C, 58.61; H, 6.76; N, 4.27. Found: C, 58.64; H, 6.72; N, 4.05.

**(10) 4-Chloro-1-tosyl-1,2,3,6-tetrahydropyridine 3j (cjj-10-172, cjj-10-186)**

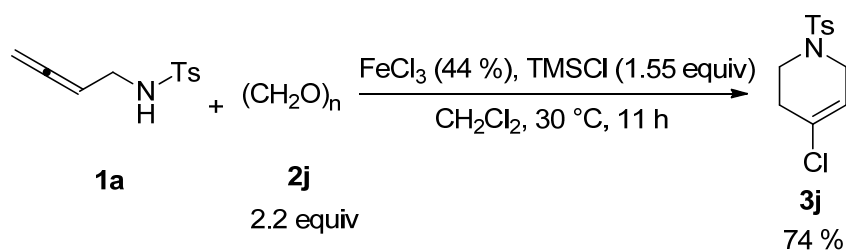

The reaction of FeCl<sub>3</sub> (14.1 mg, 0.087 mmol), *N*-(buta-2,3-dienyl)-4-tolylsulfonamide **1a** (44.7 mg, 0.20 mmol), paraformaldehyde **2j** (12.9 mg, 0.43 mmol), and TMSCl (33.2 mg, 0.31 mmol) in CH<sub>2</sub>Cl<sub>2</sub> (2 mL) afforded 40.3 mg (74 %) of **3j** (eluent: petroleum ether/ethyl acetate/CH<sub>2</sub>Cl<sub>2</sub> = 8/1/1): white solid; m.p. 145-146 °C (CH<sub>2</sub>Cl<sub>2</sub>/petroleum ether); <sup>1</sup>H NMR (300 MHz, CDCl<sub>3</sub>)  $\delta$  7.67 (d,  $J = 8.7$  Hz, 2 H, Ar-H), 7.33 (d,  $J = 8.1$  Hz, 2 H, Ar-H), 5.76-5.71 (m, 1 H, CH=), 3.68-3.60 (m, 2 H, CH<sub>2</sub>), 3.27 (t,  $J = 5.9$  Hz, 2 H, CH<sub>2</sub>), 2.50-2.38 (m, 5 H, CH<sub>3</sub> of Ts + CH<sub>2</sub>); <sup>13</sup>C NMR (75 MHz, CDCl<sub>3</sub>)  $\delta$  143.9, 133.1, 129.9, 129.7, 127.5, 119.8, 45.2, 43.2, 32.5, 21.5; MS (EI)  $m/z$  (%) 273 (M<sup>+</sup>(<sup>37</sup>Cl), 0.57), 271 (M<sup>+</sup>(<sup>35</sup>Cl), 1.35), 91(100); IR (neat) 3064,

2923, 2857, 1666, 1597, 1494, 1462, 1429, 1400, 1340, 1306, 1239, 1165, 1100, 1052, 1018  $\text{cm}^{-1}$ . Anal Calcd for  $\text{C}_{12}\text{H}_{14}\text{NO}_2\text{S}\text{Cl}$ : C, 53.03; H, 5.19; N, 5.15. Found: C, 53.25; H, 5.24; N, 4.82.

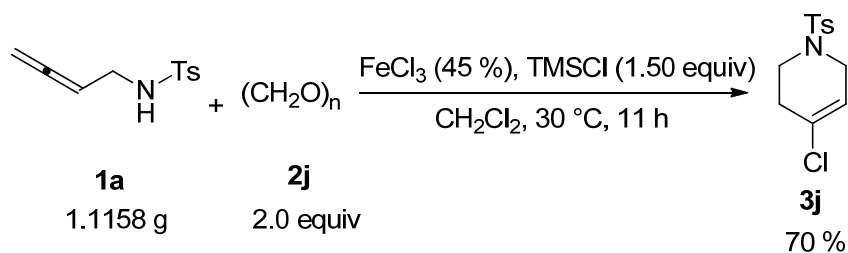

The reaction of  $\text{FeCl}_3$  (0.3651 g, 2.25 mmol), *N*-(buta-2,3-dienyl)-4-tolylsulfonamide **1a** (1.1158 g, 5.00 mmol), paraformaldehyde **2j** (0.3012 g, 10.0 mmol), and TMSCl (0.8148 g, 7.50 mmol) in  $\text{CH}_2\text{Cl}_2$  (50 mL) was stirred at  $30\text{ }^\circ\text{C}$  for 11 h. After the reaction was complete as monitored by TLC (eluent: petroleum ether : ethyl acetate = 5 : 1), the mixture was evaporated and then purified by column chromatography on silica gel (eluent: petroleum ether/ethyl acetate/ $\text{CH}_2\text{Cl}_2$  = 50/1/1) to afford 0.9501 g (70 %) of **3j** (eluent: petroleum ether/ethyl acetate/ $\text{CH}_2\text{Cl}_2$  = 50/1/1).  $^1\text{H}$  NMR (300 MHz,  $\text{CDCl}_3$ )  $\delta$  7.66 (d,  $J$  = 8.4 Hz, 2 H, Ar-H), 7.33 (d,  $J$  = 7.8 Hz, 2 H, Ar-H), 5.76-5.71 (m, 1 H, CH=), 3.66-3.61 (m, 2 H,  $\text{CH}_2$ ), 3.27 (t,  $J$  = 5.7 Hz, 2 H,  $\text{CH}_2$ ), 2.50-2.40 (m, 5 H,  $\text{CH}_3$  of Ts +  $\text{CH}_2$ ).

### Synthesis of 2,5-dihydro-1H-pyrrole derivatives

(1) 3-(Chloromethyl)-2-(4-chlorophenyl)-4-phenyl-1-tosyl-2,5-dihydro-1H-pyrrole **4a** (cjj-9-139)

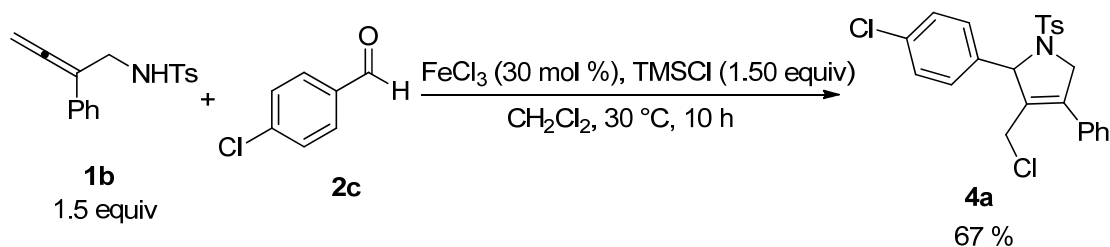

The reaction of FeCl<sub>3</sub> (19.4 mg, 0.12 mmol), 4-chlorobenzaldehyde **2c** (56.2 mg, 0.40 mmol), *N*-(2-phenylbuta-2,3-dienyl)-4-tolylsulfonamide **1b** (179.7 mg, 0.60 mmol), and TMSCl (65.4 mg, 0.60 mmol) in CH<sub>2</sub>Cl<sub>2</sub> (4 mL) afforded 122.8 mg (67 %) of **4a** (eluent: petroleum ether/ethyl acetate/CH<sub>2</sub>Cl<sub>2</sub> = 30/1/1): white solid; m.p. 137-139 °C (CH<sub>2</sub>Cl<sub>2</sub>/petroleum ether); <sup>1</sup>H NMR (300 MHz, CDCl<sub>3</sub>) δ 7.55 (d, *J* = 8.1 Hz, 2 H, Ar-H), 7.45-7.33 (m, 3 H, Ar-H), 7.31-7.18 (m, 8 H, Ar-H), 5.80-5.75 (m, 1 H, ArCHNTs), 4.74-4.57 (m, 2 H, CH<sub>2</sub>), 4.15 (d, *J* = 11.7 Hz, 1 H, one proton of CH<sub>2</sub>), 3.50 (d, *J* = 12.0 Hz, 1 H, one proton of CH<sub>2</sub>), 2.40 (s, 3 H, CH<sub>3</sub> of Ts); <sup>13</sup>C NMR (100 MHz, CDCl<sub>3</sub>) δ 143.6, 137.9, 136.4, 135.0, 134.1, 132.1, 131.9, 129.6, 129.1, 129.0, 128.9, 128.8, 127.6, 127.2, 70.7, 57.7, 37.8, 21.5; MS (EI) *m/z* (%) 461 (M<sup>+</sup>(<sup>37</sup>Cl<sup>37</sup>Cl), 2.04), 459 (M<sup>+</sup>(<sup>35</sup>Cl<sup>37</sup>Cl), 8.82), 457 (M<sup>+</sup>(<sup>35</sup>Cl<sup>35</sup>Cl), 11.57), 91(100); IR (neat) 3061, 2923, 2862, 1597, 1491, 1446, 1411, 1347, 1305, 1275, 1261, 1218, 1164, 1093, 1015 cm<sup>-1</sup>; Anal Calcd for C<sub>24</sub>H<sub>21</sub>NO<sub>2</sub>SCl<sub>2</sub>: C, 62.88; H, 4.62; N, 3.06. Found: C, 62.83; H, 4.77; N, 2.81.

**(2) 2-(4-Bromophenyl)-3-(chloromethyl)-4-phenyl-1-tosyl-2,5-dihydro-1*H*-pyrrole **4b****  
**(cjj-9-127)**

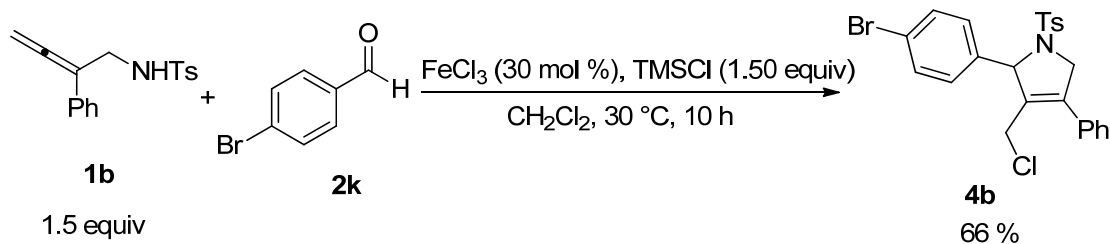

The reaction of  $\text{FeCl}_3$  (19.2 mg, 0.12 mmol), 4-bromobenzaldehyde **2k** (73.3 mg, 0.40 mmol), *N*-(2-phenylbuta-2,3-dienyl)-4-tolylsulfonamide **1b** (179.9 mg, 0.60 mmol), and  $\text{TMSCl}$  (64.7 mg, 0.60 mmol) in  $\text{CH}_2\text{Cl}_2$  (4 mL) afforded 131.7 mg (66 %) of **4b** (eluent: petroleum ether/ethyl acetate/ $\text{CH}_2\text{Cl}_2$  = 30/1/1): white solid; m.p. 144-145  $^\circ\text{C}$  ( $\text{CH}_2\text{Cl}_2$ /petroleum ether);  $^1\text{H}$  NMR (300 MHz,  $\text{CDCl}_3$ )  $\delta$  7.55 (d,  $J$  = 8.4 Hz, 2 H, Ar-H), 7.47-7.34 (m, 5 H, Ar-H), 7.31-7.14 (m, 6 H, Ar-H), 5.80-5.73 (m, 1 H, CH), 4.73-4.57 (m, 2 H,  $\text{CH}_2$ ), 4.15 (d,  $J$  = 11.7 Hz, 1 H, one proton of  $\text{CH}_2$ ), 3.51 (d,  $J$  = 12.0 Hz, 1 H, one proton of  $\text{CH}_2$ ), 2.41 (s, 3 H,  $\text{CH}_3$  of Ts);  $^{13}\text{C}$  NMR (100 MHz,  $\text{CDCl}_3$ )  $\delta$  143.7, 138.4, 136.5, 135.0, 132.1, 131.9, 131.8, 129.6, 129.3, 129.1, 129.0, 127.7, 127.3, 122.3, 70.8, 57.7, 37.8, 21.5; MS (EI)  $m/z$  (%) 505 ( $\text{M}^+(\text{}^{39}\text{Cl}^{81}\text{Br})$ , 0.49), 503 ( $\text{M}^+(\text{}^{35}\text{Cl}^{81}\text{Br} + \text{}^{37}\text{Cl}^{79}\text{Br})$ , 1.56), 501 ( $\text{M}^+(\text{}^{35}\text{Cl}^{79}\text{Br})$ , 1.08), 91(100); IR (neat) 1597, 1487, 1446, 1407, 1346, 1305, 1275, 1261, 1217, 1163, 1099, 1070, 1011  $\text{cm}^{-1}$ ; Anal Calcd for  $\text{C}_{24}\text{H}_{21}\text{NO}_2\text{SClBr}$ : C, 57.32; H, 4.21; N, 2.79. Found: C, 57.51; H, 4.26; N, 2.78.

**(3) 3-(Chloromethyl)-2-(4-fluorophenyl)-4-phenyl-1-tosyl-2,5-dihydro-1H-pyrrole 4c (cjj-9-130)**

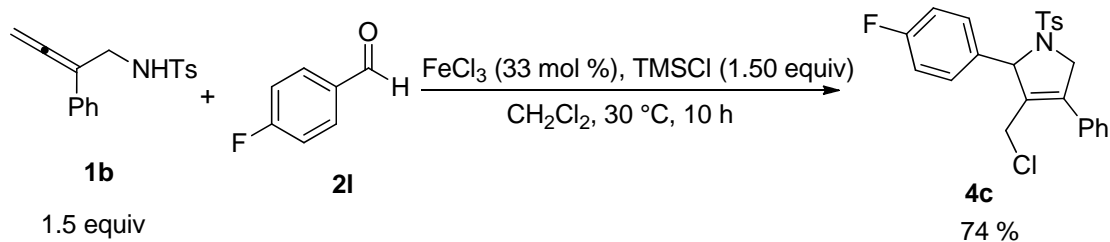

The reaction of  $\text{FeCl}_3$  (21.1 mg, 0.13 mmol), 4-fluorobenzaldehyde **2l** (49.0 mg, 0.39 mmol), *N*-(2-phenylbuta-2,3-dienyl)-4-tolylsulfonamide **1b** (179.7 mg, 0.60 mmol), and  $\text{TMSCl}$  (65.7 mg, 0.60 mmol) in  $\text{CH}_2\text{Cl}_2$  (4 mL) afforded 129.6 mg (74 %) of **4c** (eluent: petroleum ether/ethyl acetate/ $\text{CH}_2\text{Cl}_2$  = 40/1/1): white solid; m.p.  $134\text{--}136\text{ }^\circ\text{C}$  ( $\text{CH}_2\text{Cl}_2$ /petroleum ether);  $^1\text{H NMR}$  (300 MHz,  $\text{CDCl}_3$ )  $\delta$  7.54 (d,  $J = 8.4$  Hz, 2 H, Ar-H), 7.44–7.34 (m, 3 H, Ar-H), 7.33–7.18 (m, 6 H, Ar-H), 7.00 (t,  $J = 8.7$  Hz, 2 H, Ar-H), 5.81–5.75 (m, 1 H, CH), 4.72–4.55 (m, 2 H,  $\text{CH}_2$ ), 4.15 (d,  $J = 11.7$  Hz, 1 H, one proton of  $\text{CH}_2$ ), 3.51 (d,  $J = 11.7$  Hz, 1 H, one proton of  $\text{CH}_2$ ), 2.39 (s, 3 H,  $\text{CH}_3$  of Ts);  $^{13}\text{C NMR}$  (100 MHz,  $\text{CDCl}_3$ )  $\delta$  162.5 (d,  $J = 245.8$  Hz), 143.4, 136.2, 135.1 (d,  $J = 3.0$  Hz), 135.0, 132.2, 131.9, 129.5, 129.3 (d,  $J = 8.3$  Hz), 128.9, 128.8, 127.5, 127.1, 115.4 (d,  $J = 21.3$  Hz), 70.6, 57.5, 37.7, 21.3;  $^{19}\text{F NMR}$  (282 MHz,  $\text{CDCl}_3$ ) -112.8; MS (EI)  $m/z$  (%) 443 ( $\text{M}^+(\text{ }^{37}\text{Cl})$ , 0.67), 441 ( $\text{M}^+(\text{ }^{35}\text{Cl})$ , 1.67), 91(100); IR (neat) 3061, 2922, 2864, 1604, 1508, 1446, 1422, 1347, 1305, 1261, 1221, 1184, 1164, 1096, 1064, 1016  $\text{cm}^{-1}$ ; Anal Calcd for  $\text{C}_{24}\text{H}_{21}\text{NO}_2\text{SClF}$ : C, 65.22; H, 4.79; N, 3.17. Found: C, 64.96; H, 4.93; N, 2.90.

**(4) 3-(Chloromethyl)-4-phenyl-2-(4-methylphenyl)-1-tosyl-2,5-dihydro-1H-pyrrole 4d (cjj-9-145)**

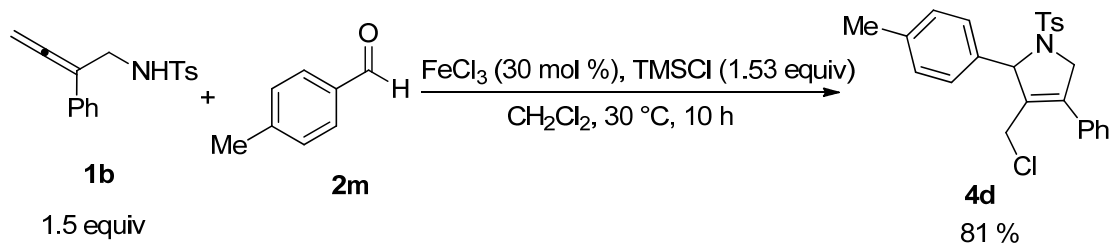

The reaction of  $\text{FeCl}_3$  (19.5 mg, 0.12 mmol), 4-methylbenzaldehyde **2m** (48.1 mg, 0.40 mmol), *N*-(2-phenylbuta-2,3-dienyl)-4-tolylsulfonamide **1b** (179.5 mg, 0.60 mmol), and  $\text{TMSCl}$  (66.3 mg, 0.61 mmol) in  $\text{CH}_2\text{Cl}_2$  (4 mL) afforded 142.3 mg (81 %) of **4d** (eluent: petroleum ether/ethyl acetate/ $\text{CH}_2\text{Cl}_2$  = 30/1/1): white solid; m.p. 144-146  $^\circ\text{C}$  ( $\text{CH}_2\text{Cl}_2$ /petroleum ether);  $^1\text{H}$  NMR (300 MHz,  $\text{CDCl}_3$ )  $\delta$  7.55 (d,  $J$  = 8.1 Hz, 2 H, Ar-H), 7.44-7.33 (m, 3 H, Ar-H), 7.31-7.23 (m, 2 H, Ar-H), 7.20 (d,  $J$  = 8.1 Hz, 4 H, Ar-H), 7.11 (d,  $J$  = 8.1 Hz, 2 H, Ar-H), 5.81-5.75 (m, 1 H, ArCHNTs), 4.72-4.50 (m, 2 H,  $\text{CH}_2$ ), 4.13 (d,  $J$  = 11.4 Hz, 1 H, one proton of  $\text{CH}_2$ ), 3.53 (d,  $J$  = 11.7 Hz, 1 H, one proton of  $\text{CH}_2$ ), 2.39 (s, 3 H,  $\text{CH}_3$ ), 2.34 (s, 3 H,  $\text{CH}_3$ );  $^{13}\text{C}$  NMR (100 MHz,  $\text{CDCl}_3$ )  $\delta$  143.2, 137.9, 136.2, 135.9, 135.2, 132.7, 132.2, 129.4, 129.3, 128.82, 128.81, 127.6, 127.5, 127.2, 71.2, 57.6, 37.9, 21.4, 21.1; MS (EI)  $m/z$  (%) 439 ( $\text{M}^+(\text{Cl})$ , 1.33), 437 ( $\text{M}^+(\text{Cl})$ , 2.96), 91(100); IR (neat) 3025, 2922, 2862, 1598, 1512, 1495, 1446, 1346, 1305, 1274, 1260, 1181, 1163, 1098, 1064, 1018  $\text{cm}^{-1}$ ; Anal Calcd for  $\text{C}_{25}\text{H}_{24}\text{NO}_2\text{SCl}$ : C, 68.56; H, 5.52; N, 3.20. Found: C, 68.86; H, 5.82; N, 3.04.

**(5) 3-(Chloromethyl)-2-(4-methoxyphenyl)-4-phenyl-1-tosyl-2,5-dihydro-1H-pyrrole 4e (cjj-9-178)**

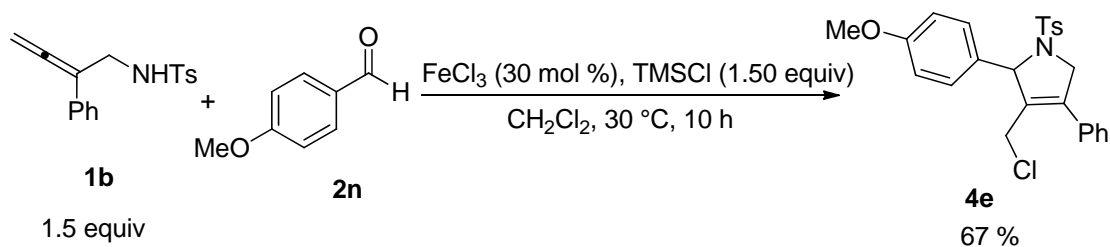

The reaction of  $\text{FeCl}_3$  (19.5 mg, 0.12 mmol), 4-methoxybenzaldehyde **2n** (54.5 mg, 0.40 mmol), *N*-(2-phenylbuta-2,3-dienyl)-4-tolylsulfonamide **1b** (179.3 mg, 0.60 mmol), and  $\text{TMSCl}$  (65.2 mg, 0.60 mmol) in  $\text{CH}_2\text{Cl}_2$  (4 mL) afforded 122.6 mg (67 %) of **4e** (eluent: petroleum ether/ethyl acetate/ $\text{CH}_2\text{Cl}_2 = 20/1/1$ ): oil;  $^1\text{H}$  NMR (300 MHz,  $\text{CDCl}_3$ )  $\delta$  7.53 (d,  $J = 8.1$  Hz, 2 H, Ar-H), 7.45-7.33 (m, 3 H, Ar-H), 7.29-7.17 (m, 6 H, Ar-H), 6.83 (d,  $J = 8.7$  Hz, 2 H, Ar-H), 5.80-5.70 (m, 1 H, ArCHNTs), 4.69-4.53 (m, 2 H,  $\text{CH}_2$ ), 4.14 (d,  $J = 11.4$  Hz, 1 H, one proton of  $\text{CH}_2$ ), 3.81 (s, 3 H,  $\text{CH}_3$  of OMe), 3.54 (d,  $J = 11.7$  Hz, 1 H, one proton of  $\text{CH}_2$ ), 2.38 (s, 3 H,  $\text{CH}_3$  of Ts);  $^{13}\text{C}$  NMR (100 MHz,  $\text{CDCl}_3$ )  $\delta$  159.6, 143.3, 135.8, 135.3, 132.8, 132.3, 131.3, 129.5, 128.91, 128.90, 127.7, 127.3, 114.0, 71.0, 57.5, 55.3, 38.0, 21.5; MS (EI)  $m/z$  (%) 455 ( $\text{M}^+(\text{^{37}Cl})$ , 2.03), 453 ( $\text{M}^+(\text{^{35}Cl})$ , 4.84), 91(100); IR (neat) 3022, 2922, 2863, 2821, 1596, 1491, 1457, 1447, 1377, 1342, 1309, 1276, 1261, 1245, 1188, 1162, 1100, 1071, 1045  $\text{cm}^{-1}$ ; HRMS (EI) calcd for  $\text{C}_{25}\text{H}_{24}\text{NO}_3\text{S}^{35}\text{Cl}$  ( $\text{M}^+$ ) 453.1165. Found 453.1161.

**(6) 3-(Chloromethyl)-2-(3-methoxyphenyl)-4-phenyl-1-tosyl-2,5-dihydro-1H-pyrrole 4f (txj-1-21)**



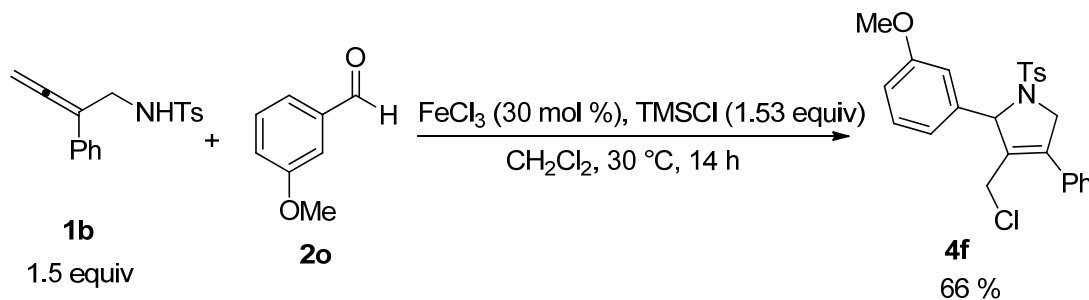

The reaction of FeCl<sub>3</sub> (19.2 mg, 0.12 mmol), 3-methoxybenzaldehyde **2o** (54.5 mg, 0.40 mmol), *N*-(2-phenylbuta-2,3-dienyl)-4-tolylsulfonamide **1b** (175.1 mg, 0.58 mmol), and TMSCl (66.3 mg, 0.61 mmol) in CH<sub>2</sub>Cl<sub>2</sub> (4 mL) afforded 119.8 mg (66 %) of **4f** (eluent: petroleum ether/ethyl acetate/CH<sub>2</sub>Cl<sub>2</sub> = 10/1/1): oil; <sup>1</sup>H NMR (300 MHz, CDCl<sub>3</sub>) δ 7.54 (d, *J* = 8.1 Hz, 2 H, Ar-H), 7.45-7.33 (m, 3 H, Ar-H), 7.30-7.17 (m, 5 H, Ar-H), 6.92 (d, *J* = 7.5 Hz, 1 H, Ar-H), 6.83 (d, *J* = 8.1 Hz, 1 H, Ar-H), 6.78 (s, 1 H, Ar-H), 5.83-5.76 (m, 1 H, ArCHNTs), 4.72-4.57 (m, 2 H, CH<sub>2</sub>), 4.15 (d, *J* = 11.7 Hz, 1 H, one proton of CH<sub>2</sub>), 3.76 (s, 3 H, CH<sub>3</sub> of OMe), 3.54 (d, *J* = 11.7 Hz, 1 H, one proton of CH<sub>2</sub>), 2.39 (s, 3 H, CH<sub>3</sub> of Ts); <sup>13</sup>C NMR (100 MHz, CDCl<sub>3</sub>) δ 159.9, 143.5, 140.9, 136.2, 135.3, 132.8, 132.3, 129.9, 129.6, 129.1, 129.0, 127.8, 127.4, 120.1, 113.7, 113.3, 71.5, 57.9, 55.3, 38.0, 21.6; MS (EI) *m/z* (%) 455 (M<sup>+</sup>(<sup>37</sup>Cl), 1.84), 453 (M<sup>+</sup>(<sup>35</sup>Cl), 5.38), 91(100); IR (neat) 3057, 3030, 2955, 2924, 2854, 1599, 1489, 1455, 1346, 1279, 1257, 1218, 1164, 1101, 1047 cm<sup>-1</sup>; HRMS (EI) calcd for C<sub>25</sub>H<sub>24</sub>NO<sub>3</sub>S<sup>35</sup>Cl (M<sup>+</sup>): 453.1165. Found: 453.1161.

**(7) 3-(Chloromethyl)-2-(2-fluorophenyl)-4-phenyl-1-tosyl-2,5-dihydro-1*H*-pyrrole **4g** (cjj-9-169)**

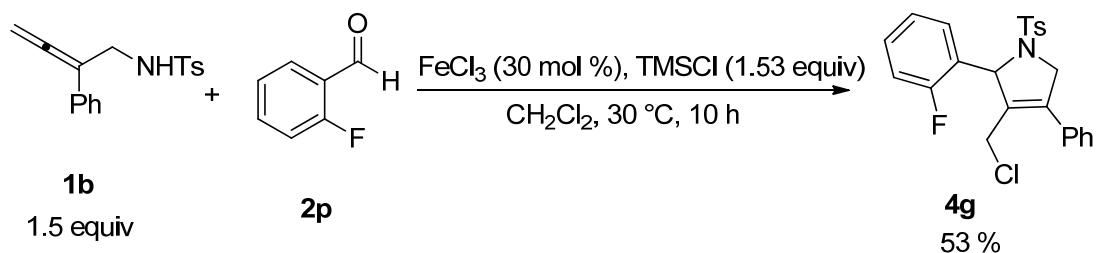

The reaction of FeCl<sub>3</sub> (19.5 mg, 0.12 mmol), 2-fluorobenzaldehyde **2p** (49.6 mg, 0.40 mmol), *N*-(2-phenylbuta-2,3-dienyl)-4-tolylsulfonamide **1b** (179.3 mg, 0.60 mmol), and TMSCl (66.3 mg, 0.61 mmol) in CH<sub>2</sub>Cl<sub>2</sub> (4 mL) afforded 93.5 mg (53 %) of **4g** (eluent: petroleum ether/ethyl acetate/CH<sub>2</sub>Cl<sub>2</sub> = 30/1/1): white solid; m.p. 125-127 °C (CH<sub>2</sub>Cl<sub>2</sub>/petroleum ether); <sup>1</sup>H NMR (300 MHz, CDCl<sub>3</sub>) δ 7.58 (d, *J* = 8.4 Hz, 2 H, Ar-H), 7.44-7.32 (m, 4 H, Ar-H), 7.32-7.17 (m, 5 H, Ar-H), 7.12 (t, *J* = 7.5 Hz, 1 H, Ar-H), 6.95 (t, *J* = 9.5 Hz, 1 H, Ar-H), 6.10-6.00 (m, 1 H, ArCHNTs), 4.67-4.55 (m, 2 H, CH<sub>2</sub>), 4.13 (d, *J* = 11.4 Hz, 1 H, one proton of CH<sub>2</sub>), 3.58 (d, *J* = 11.4 Hz, 1 H, one proton of CH<sub>2</sub>), 2.38 (s, 3 H, CH<sub>3</sub> of Ts); <sup>13</sup>C NMR (100 MHz, CDCl<sub>3</sub>) δ 160.8 (d, *J* = 247.7 Hz), 143.4, 136.9, 134.8, 132.0, 130.9, 130.1 (d, *J* = 3.4 Hz), 130.0 (d, *J* = 8.3 Hz), 129.5, 128.9, 128.8, 127.5, 127.1, 126.0 (d, *J* = 11.8 Hz), 124.4 (d, *J* = 3.4 Hz), 115.7 (d, *J* = 21.6 Hz), 66.2, 57.6, 37.6, 21.4; <sup>19</sup>F NMR (282 MHz, CDCl<sub>3</sub>) -118.2; MS (EI) *m/z* (%) 443 (M<sup>+</sup>(<sup>37</sup>Cl), 0.79), 441 (M<sup>+</sup>(<sup>35</sup>Cl), 2.06), 91(100); IR (neat) 3061, 2922, 2863, 1615, 1598, 1491, 1457, 1446, 1349, 1306, 1267, 1220, 1165, 1096, 1033, 1017 cm<sup>-1</sup>; Anal Calcd for C<sub>24</sub>H<sub>21</sub>NO<sub>2</sub>SClF: C, 65.22; H, 4.79; N, 3.17. Found: C, 65.32; H, 4.92; N, 3.00.

**(8) 3-(Chloromethyl)-4-phenyl-2-propyl-1-tosyl-2,5-dihydro-1*H*-pyrrole **4h****

(tangxj-4-81)

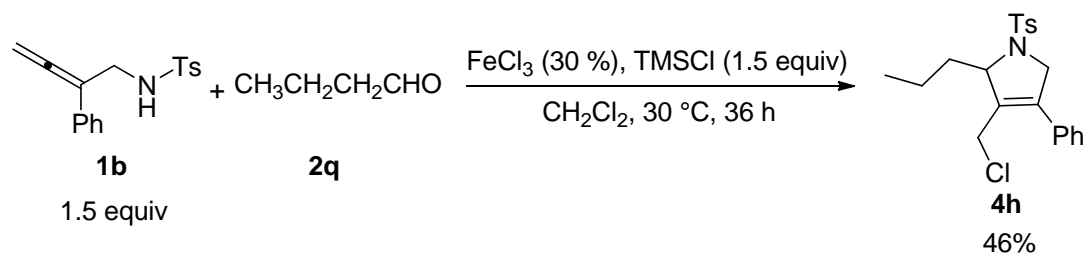

The reaction of  $\text{FeCl}_3$  (19.4 mg, 0.12 mmol),  $n\text{-C}_3\text{H}_7\text{CHO}$  **2q** (29.0 mg, 0.40 mmol),  $N$ -(2-phenylbuta-2,3-dienyl)-4-tolylsulfonamide **1b** (180.0 mg, 0.60 mmol), and  $\text{TMSCl}$  (65.4 mg, 0.6 mmol) in  $\text{CH}_2\text{Cl}_2$  (4 mL) afforded 72.3 mg (46 %) of **4h** (eluent: petroleum ether/ethyl acetate/ $\text{CH}_2\text{Cl}_2$  = 30/1/1): oil;  $^1\text{H}$  NMR (400 MHz,  $\text{CDCl}_3$ )  $\delta$  7.74 (d,  $J$  = 8.0 Hz, 2 H, Ar-H), 7.39-7.27 (m, 5 H, Ar-H), 7.13-7.08 (m, 2 H, Ar-H), 4.91-4.86 (m, 1 H, CHNTs), 4.42 (s, 2 H,  $\text{CH}_2\text{NTs}$ ), 4.15 (d,  $J$  = 12.0 Hz, 1 H, Ar-H), 4.15 (d,  $J$  = 12.0 Hz, 1 H, one proton of  $\text{CH}_2$ ), 3.93 (d,  $J$  = 12.0 Hz, 1 H, one proton of  $\text{CH}_2$ ), 2.41 (s, 3 H,  $\text{CH}_3$  of Ts), 2.06-1.95 (m, 1 H, one proton of  $\text{CH}_2$ ), 1.76-1.65 (m, 1 H, one proton of  $\text{CH}_2$ ), 1.60-1.45 (m, 1 H, one proton of  $\text{CH}_2$ ), 1.42-1.28 (m, 1 H, one proton of  $\text{CH}_2$ ), 0.96 (t,  $J$  = 7.4 Hz, 3 H,  $\text{CH}_3$ );  $^{13}\text{C}$  NMR (100 MHz,  $\text{CDCl}_3$ )  $\delta$  143.6, 136.8, 134.4, 132.4, 131.8, 129.7, 128.8, 128.7, 127.5, 127.4, 68.2, 58.0, 38.1, 35.3, 21.5, 16.9, 14.0; MS (ESI)  $m/z$  (%) 486 ( $\text{M}+\text{Py}+\text{NH}_4^+$ ,  $^{35}\text{Cl}$ ), 392 ( $\text{M}+\text{H}^+$ ,  $^{37}\text{Cl}$ ), 390 ( $\text{M}+\text{H}^+$ ,  $^{35}\text{Cl}$ ); IR (neat) 2956, 2866, 1660, 1596, 1495, 1453, 1340, 1267, 1217, 1158, 1095, 1031  $\text{cm}^{-1}$ ; HRMS (ESI) calcd for  $\text{C}_{21}\text{H}_{24}^{35}\text{ClNO}_2\text{S}$  ( $\text{M}^+$ ): 389.1216. Found: 389.1226.

### Synthetic application via coupling of the C-Cl bond

(1) Synthesis of 4-phenyl-1-tosyl-1,2,3,6-tetrahydropyridine **6a** (cjj-12-40)

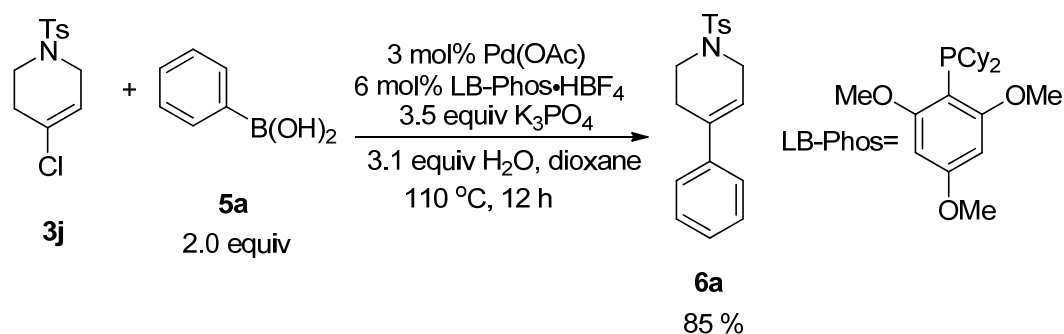

**Typical Procedure.** To a rubber-capped Schlenk vessel was added K<sub>3</sub>PO<sub>4</sub> (152.0 mg, 0.70 mmol). This equipment was dried with flame under vacuum and backfilled with Ar for three times. Then Pd(OAc)<sub>2</sub> (1.4 mg, 0.006 mmol), LB-Phos • HBF<sub>4</sub> (5.6 mg, 0.012 mmol), phenyl boronic acid (48.8 mg, 0.40 mmol), and 0.5 mL of dioxane were added sequentially to the Schlenk vessel. Then **3j** (54.5 mg, 0.20 mmol), 0.5 mL of dioxane, and water (11.2 mg, 0.62 mmol) were added sequentially. The resulting mixture was stirred at 110 °C for 12 h. After the reaction was complete as monitored by TLC (petroleum ether : ethyl acetate = 5 : 1), the reaction mixture was evaporated and purified via flash chromatography on silica gel (eluent: petroleum ether/ethyl acetate/CH<sub>2</sub>Cl<sub>2</sub> = 10/1/1) to afford 53.4 mg (85 %) of **6a**: white solid; m.p. 213-215 °C (CH<sub>2</sub>Cl<sub>2</sub>/petroleum ether); <sup>1</sup>H NMR (300 MHz, CDCl<sub>3</sub>) δ 7.72 (d, *J* = 8.4 Hz, 2 H, Ar-H), 7.38-7.20 (m, 7 H, Ar-H), 5.60-5.58 (m, 1 H, CH=), 3.80-3.72 (m, 2 H, CH<sub>2</sub>), 3.31 (t, *J* = 5.7 Hz, 2 H, CH<sub>2</sub>), 2.66-2.52 (m, 2 H, CH<sub>2</sub>), 2.43 (s, 3 H, CH<sub>3</sub> of Ts); <sup>13</sup>C NMR (100 MHz, CDCl<sub>3</sub>) δ 143.6, 140.0, 135.3, 133.0, 129.6, 128.4, 127.7, 127.5, 124.9, 118.9, 45.2, 43.0, 27.5, 21.5; MS (EI) *m/z* (%) 313 (M<sup>+</sup>, 7.25), 131 (100); IR (neat) 2960, 2926, 2859, 1595, 1497, 1446, 1342, 1259, 1165, 1103, 1063, 1020 cm<sup>-1</sup>;

Anal Calcd for C<sub>18</sub>H<sub>19</sub>NO<sub>2</sub>S: C, 68.98; H, 6.11; N, 4.47. Found: C, 68.95; H, 6.25; N, 4.41.

The following compounds were prepared according to this procedure.

**(2) 4-(2-Furanyl)-1-tosyl-1,2,3,6-tetrahydropyridine 6b (cjj-9-135)**

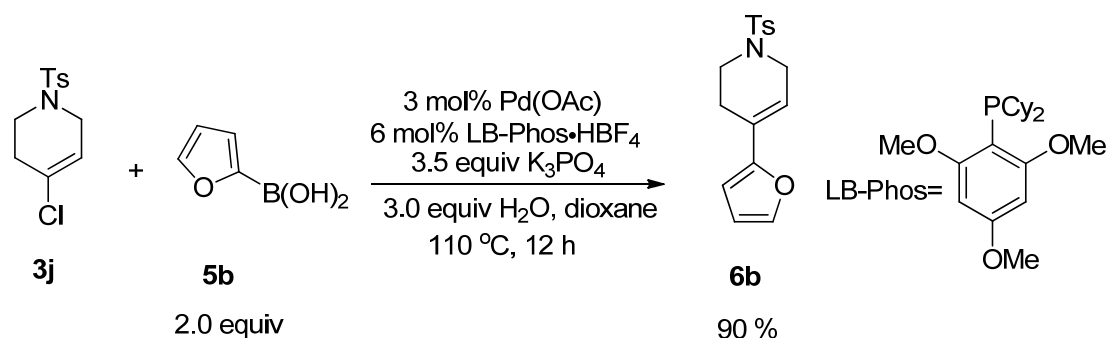

The reaction of K<sub>3</sub>PO<sub>4</sub> (152.1 mg, 0.70 mmol), Pd(OAc)<sub>2</sub> (1.4 mg, 0.006 mmol), LB-Phos · HBF<sub>4</sub> (5.5 mg, 0.012 mmol), 2-furanyl boronic acid (44.8 mg, 0.40 mmol), **3j** (53.7 mg, 0.20 mmol), and water (10.7 mg, 0.59 mmol) in dioxane (1 mL) afforded 54.0 mg (90 %) of **6b** (eluent: petroleum ether/ethyl acetate/CH<sub>2</sub>Cl<sub>2</sub> = 8/1/1): white solid; m.p. 194-195 °C (CH<sub>2</sub>Cl<sub>2</sub>/petroleum ether); <sup>1</sup>H NMR (300 MHz, CDCl<sub>3</sub>) δ 7.70 (d, *J* = 8.4 Hz, 2 H, Ar-H), 7.33 (d, *J* = 6.9 Hz, 3 H, Ar-H + Furan-H), 6.39-6.32 (m, 1 H, CH), 6.22-6.17 (m, 1 H, CH), 6.14-6.07 (m, 1 H, CH), 3.80-3.74 (m, 2 H, CH<sub>2</sub>), 3.28 (t, *J* = 5.9 Hz, 2 H, CH<sub>2</sub>), 2.55-2.46 (m, 2 H, CH<sub>2</sub>), 2.43 (s, 3 H, CH<sub>3</sub> of Ts); <sup>13</sup>C NMR (100 MHz, CDCl<sub>3</sub>) δ 153.3, 143.6, 141.8, 133.2, 129.7, 127.7, 125.6, 116.2, 111.0, 105.2, 44.7, 42.4, 25.2, 21.5; MS (EI) *m/z* (%) 303 (M<sup>+</sup>, 8.79), 148 (100); IR (neat) 2974, 2922, 1597, 1489, 1458, 1400, 1339, 1310, 1291, 1276, 1261, 1240, 1162,

1122, 1101, 1063, 1005  $\text{cm}^{-1}$ ; Anal Calcd for  $\text{C}_{16}\text{H}_{17}\text{NO}_3\text{S}$ : C, 63.34; H, 5.65; N, 4.62.

Found: C, 63.10; H, 5.73; N, 4.51.

**(3) 2,4-Diphenyl-1-tosyl-1,2,3,6-tetrahydropyridine 6c (cjj-8-191)**

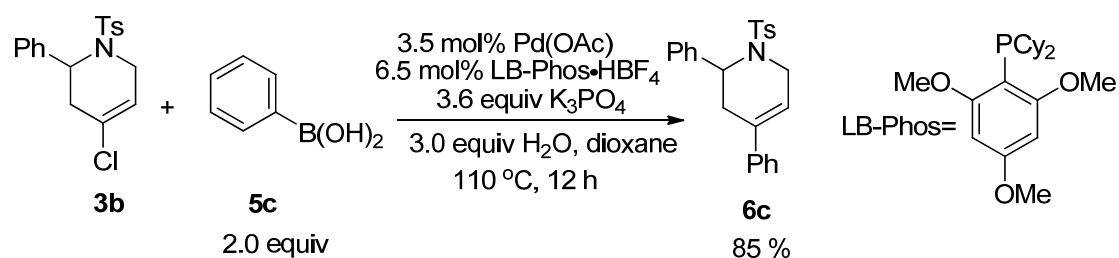

The reaction of  $\text{K}_3\text{PO}_4$  (153.2 mg, 0.71 mmol),  $\text{Pd}(\text{OAc})_2$  (1.5 mg, 0.007 mmol), LB-Phos  $\cdot$   $\text{HBF}_4$  (5.7 mg, 0.013 mmol), phenyl boronic acid (48.2 mg, 0.39 mmol), **3b** (71.2 mg, 0.20 mmol), and water (11.3 mg, 0.63 mmol) in dioxane (1 mL) afforded 67.8 mg (85 %) of **6c** (eluent: petroleum ether/ethyl acetate/ $\text{CH}_2\text{Cl}_2$  = 20/1/1): oil;  $^1\text{H}$  NMR (300 MHz,  $\text{CDCl}_3$ )  $\delta$  7.72 (d,  $J$  = 8.4 Hz, 2 H, Ar-H), 7.37-7.15 (m, 12 H, Ar-H), 5.94-5.87 (m, 1 H, CH=), 5.46 (d,  $J$  = 6.0 Hz, 1 H, ArCHNTs), 4.38-4.27 (m, 1 H, one proton of  $\text{TsNCH}_2$ ), 3.61-3.48 (m, 1 H, one proton of  $\text{TsNCH}_2$ ), 2.87-2.60 (m, 2 H,  $\text{CH}_2$ ), 2.37 (s, 3 H,  $\text{CH}_3$  of Ts);  $^{13}\text{C}$  NMR (75 MHz,  $\text{CDCl}_3$ )  $\delta$  143.2, 140.2, 138.9, 137.5, 134.2, 129.5, 128.42, 128.36, 127.54, 127.49, 127.2, 127.0, 124.9, 120.0, 53.1, 41.3, 28.4, 21.4; MS (EI)  $m/z$  (%) 389 ( $\text{M}^+$ , 7.58), 94 (100); IR (neat) 3059, 3030, 2922, 2849, 1684, 1597, 1578, 1495, 1448, 1370, 1342, 1305, 1290, 1262, 1161, 1097, 1070, 1031, 1018  $\text{cm}^{-1}$ ; HRMS (EI) calcd for  $\text{C}_{24}\text{H}_{23}\text{NO}_2\text{S}$  ( $\text{M}^+$ ) 389.1450. Found 389.1448.

$^1\text{H}$  NMR,  $^{13}\text{C}$  NMR, and  $^{19}\text{F}$  NMR Spectra

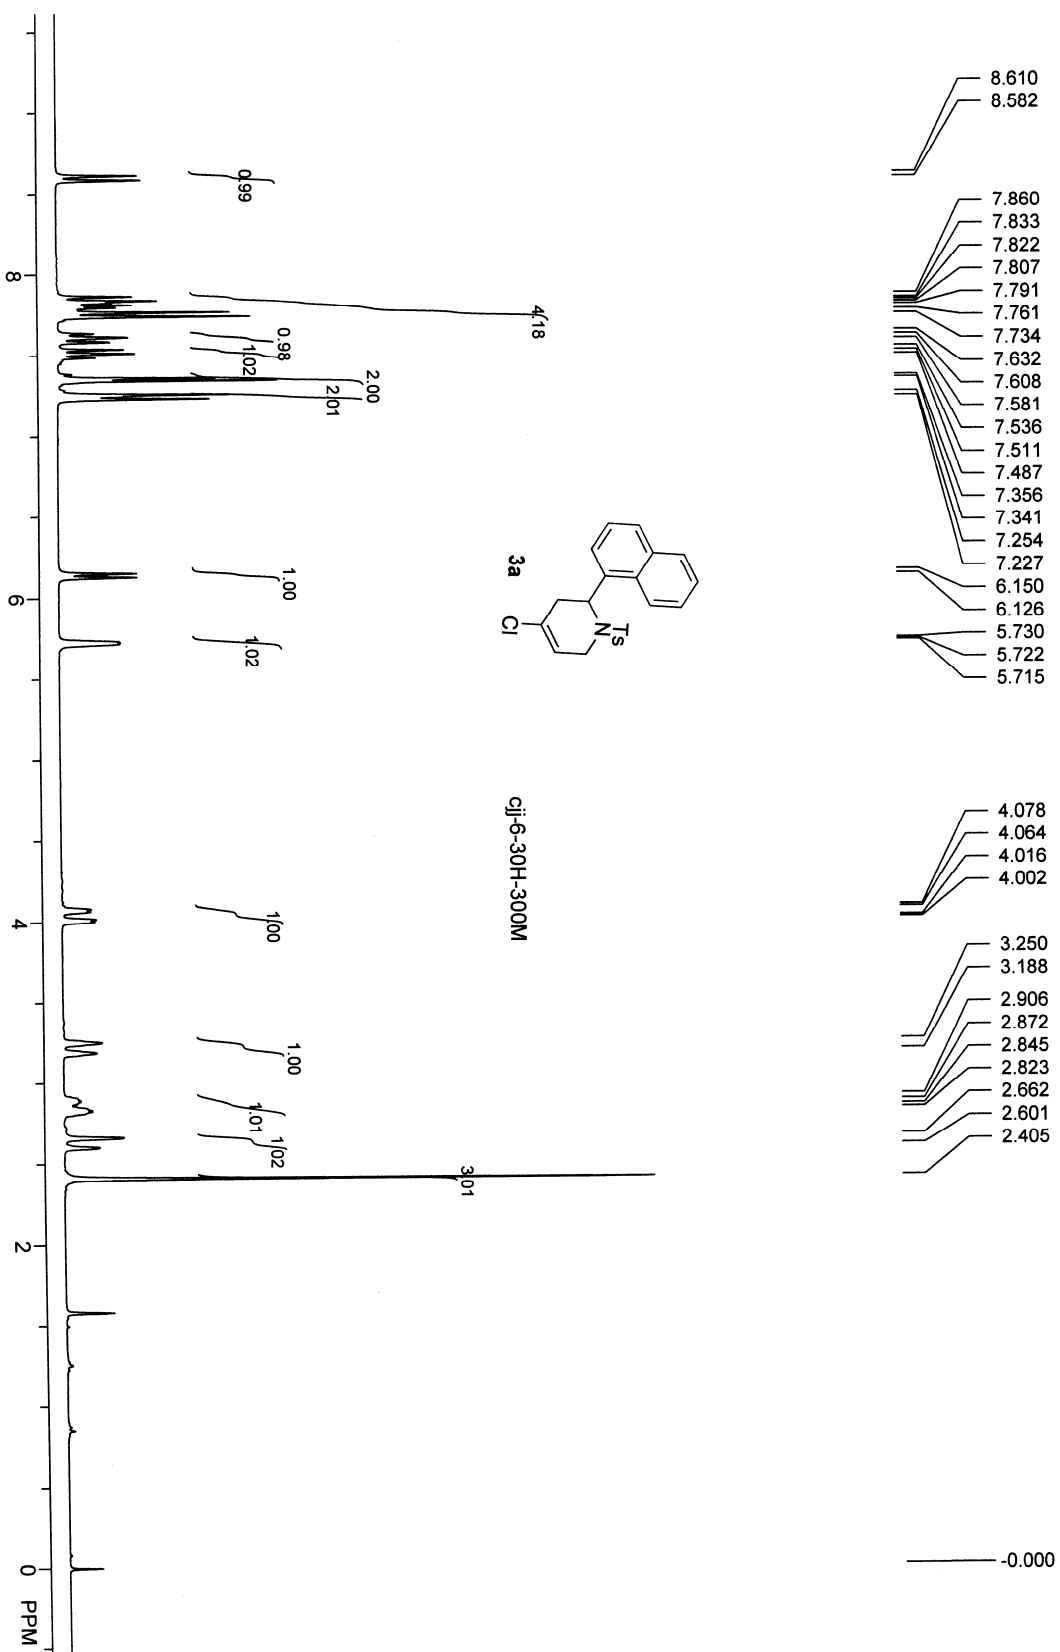



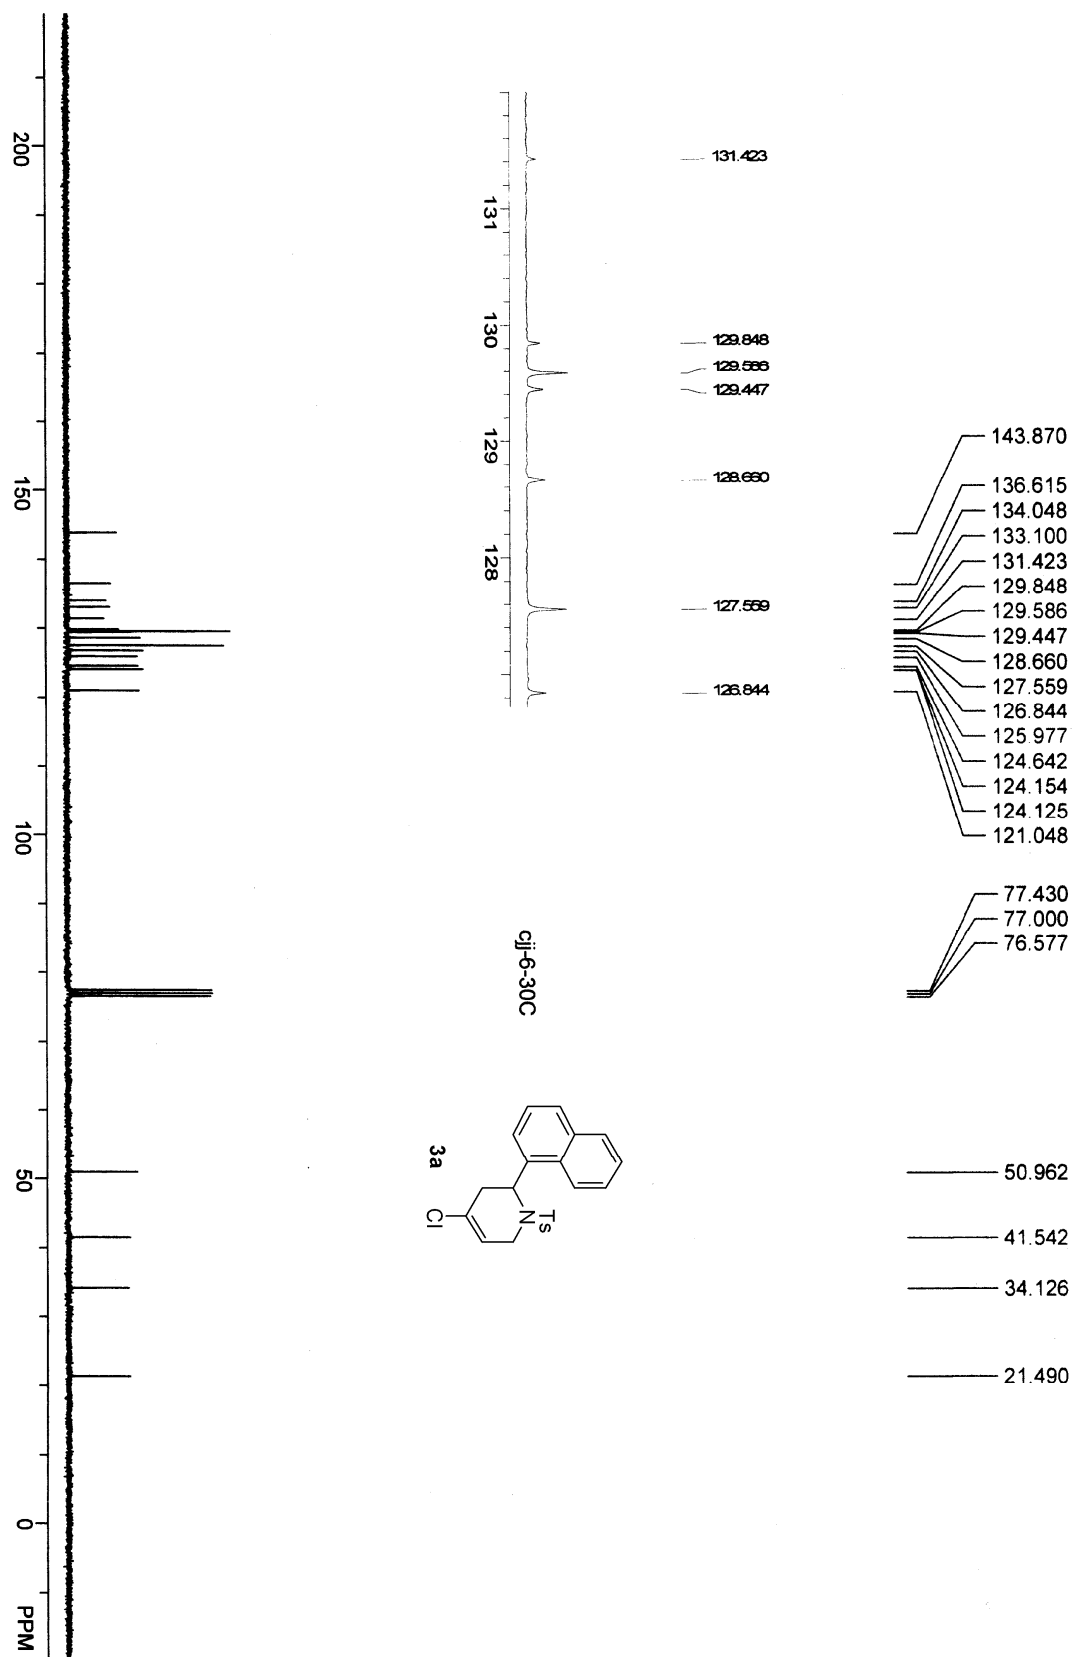

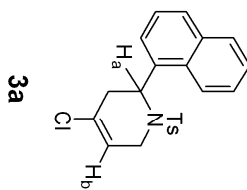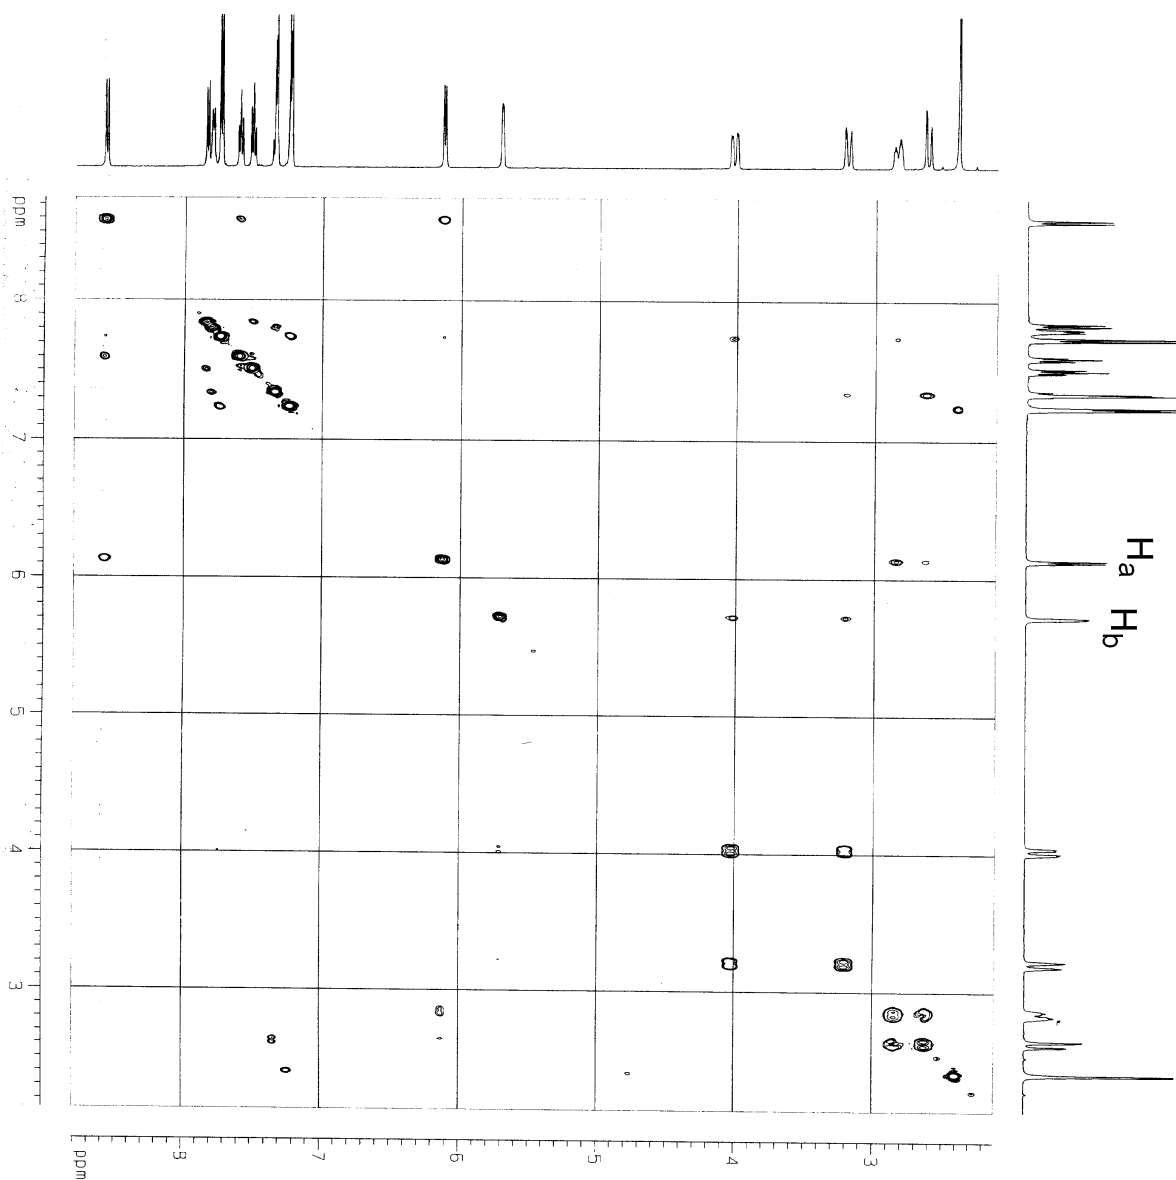

notes Y  
CJ-6-30

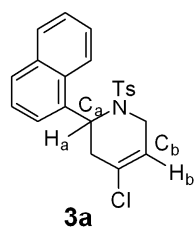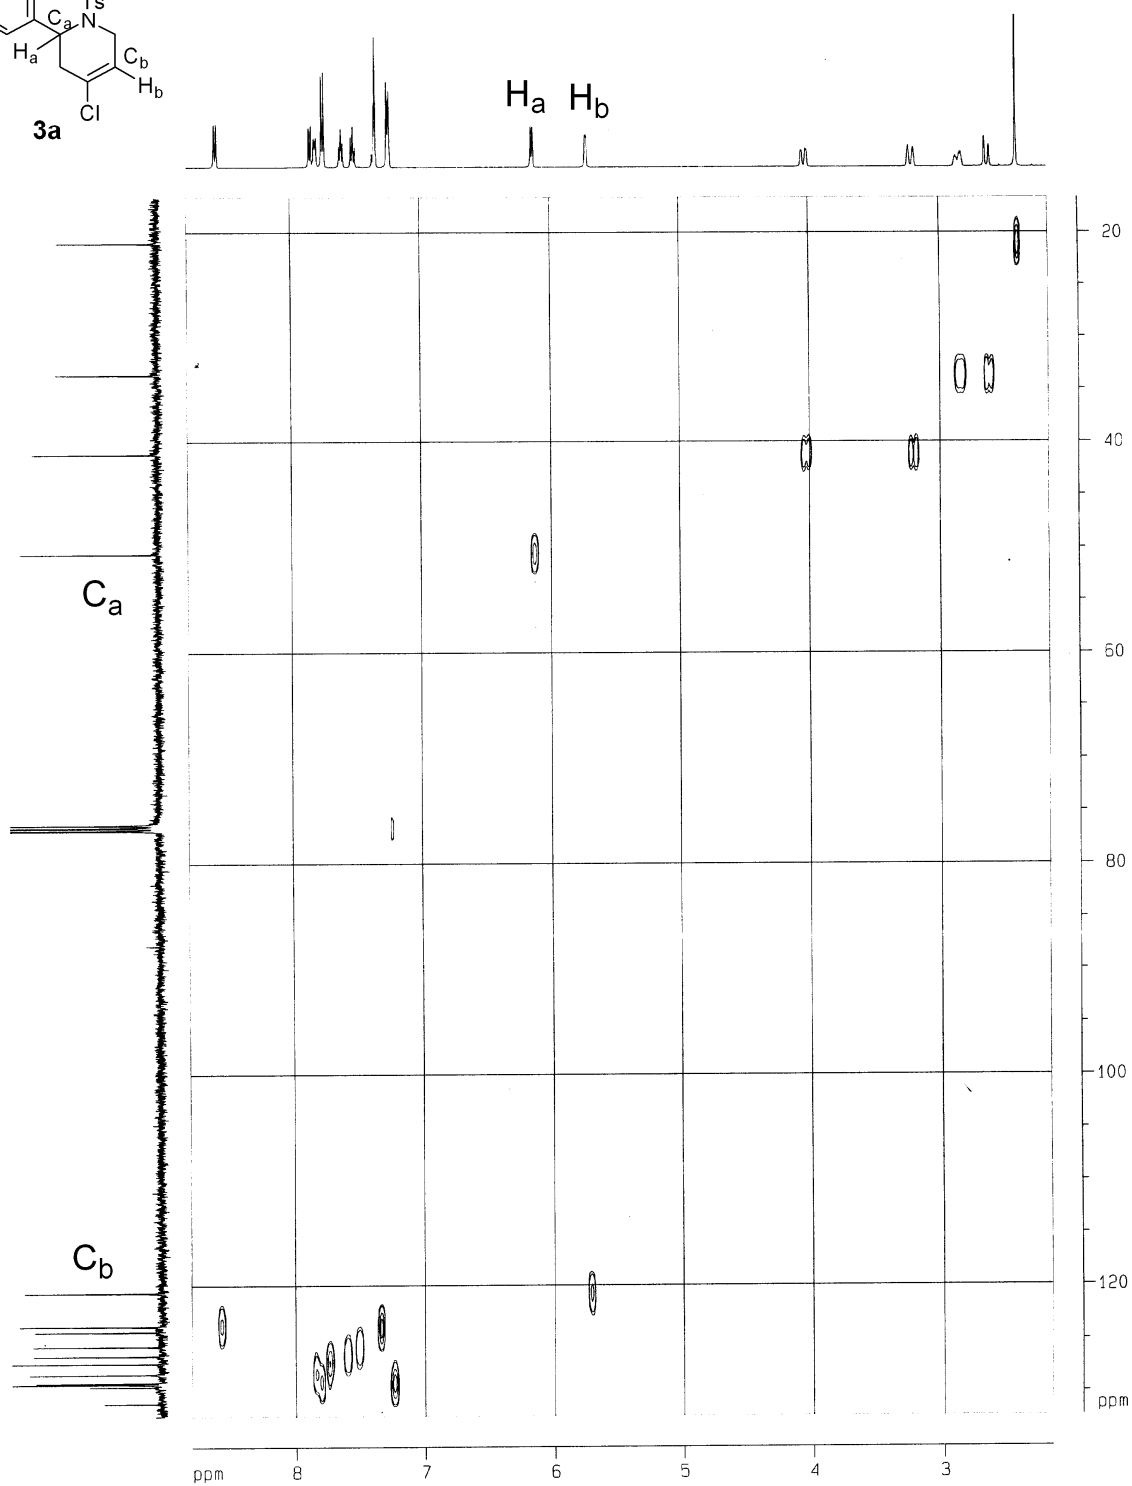

MSK  
CJ-6-30

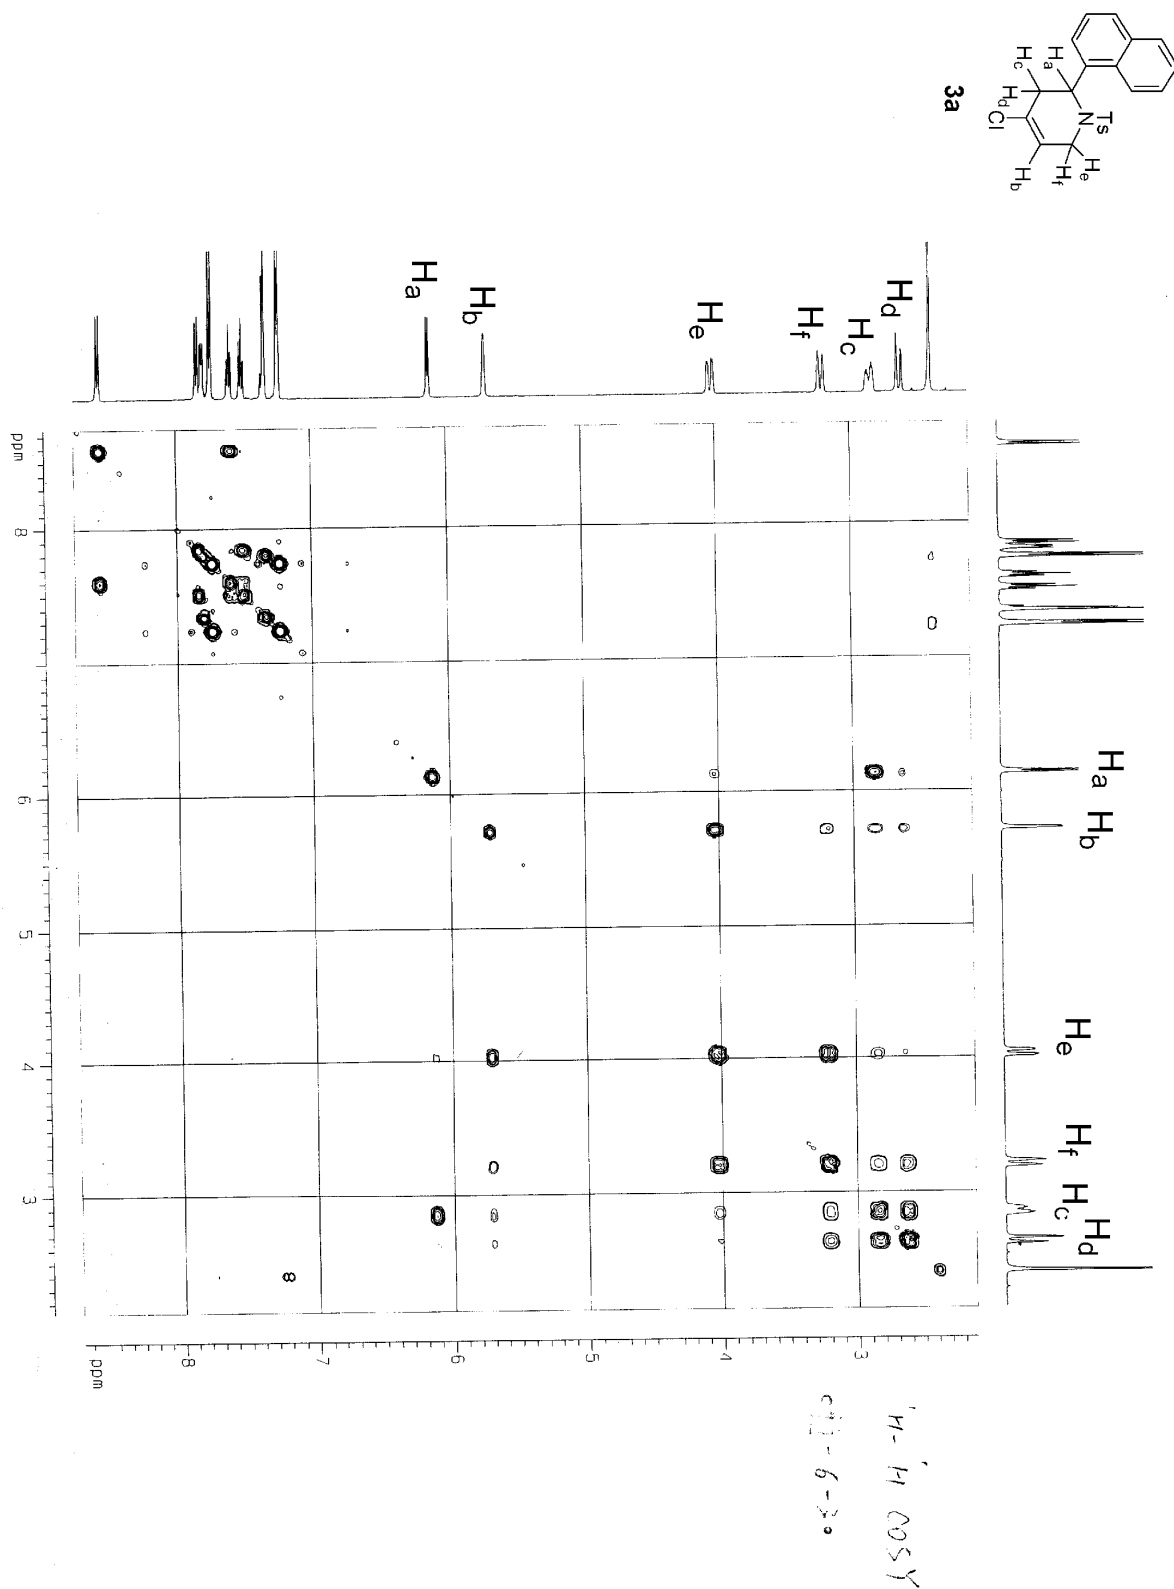

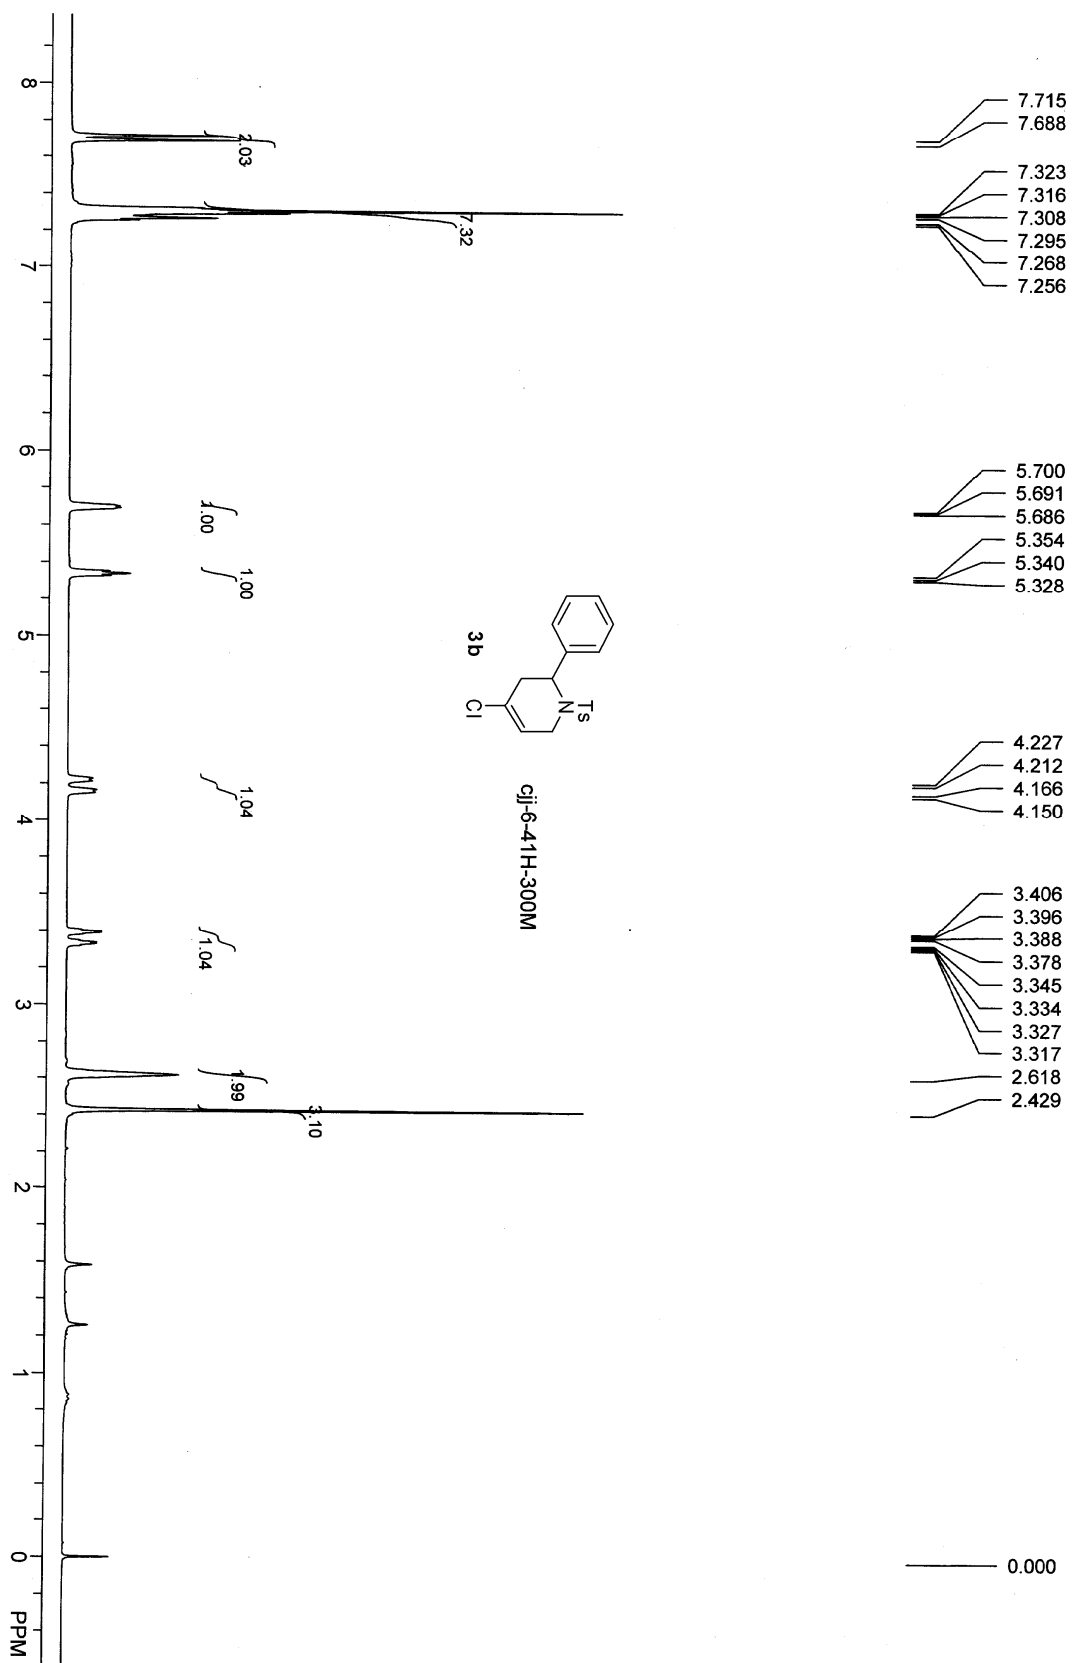

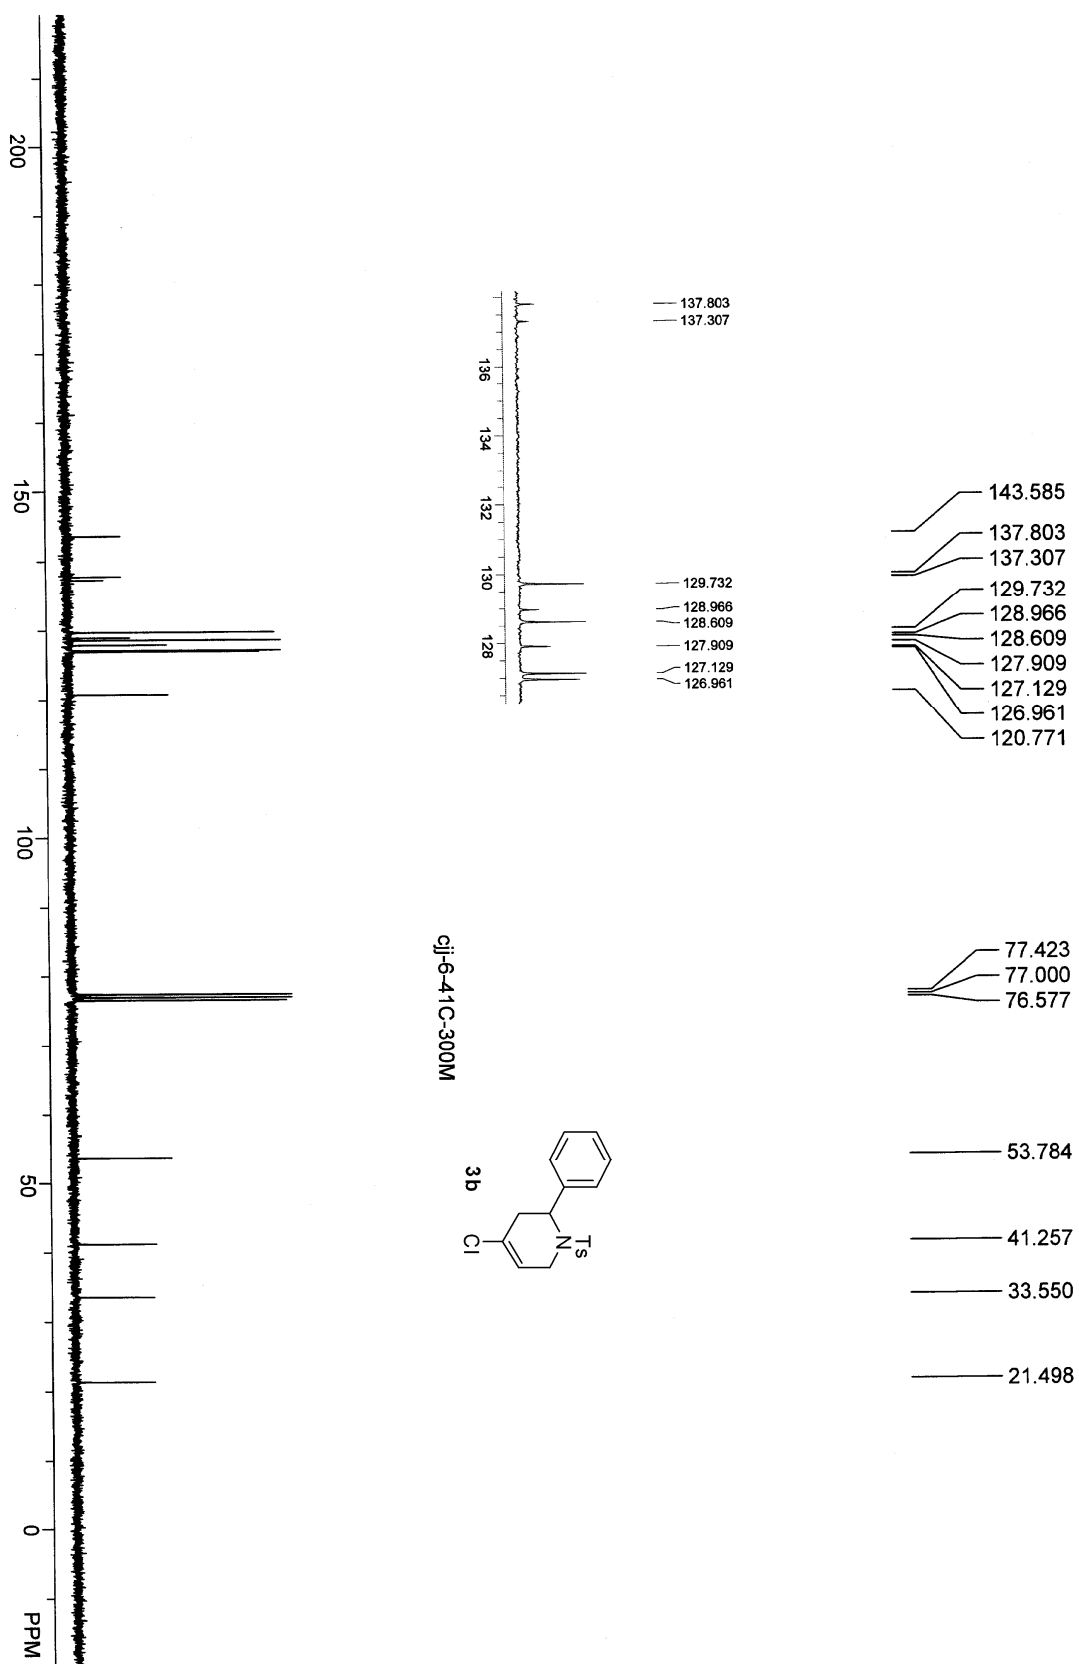

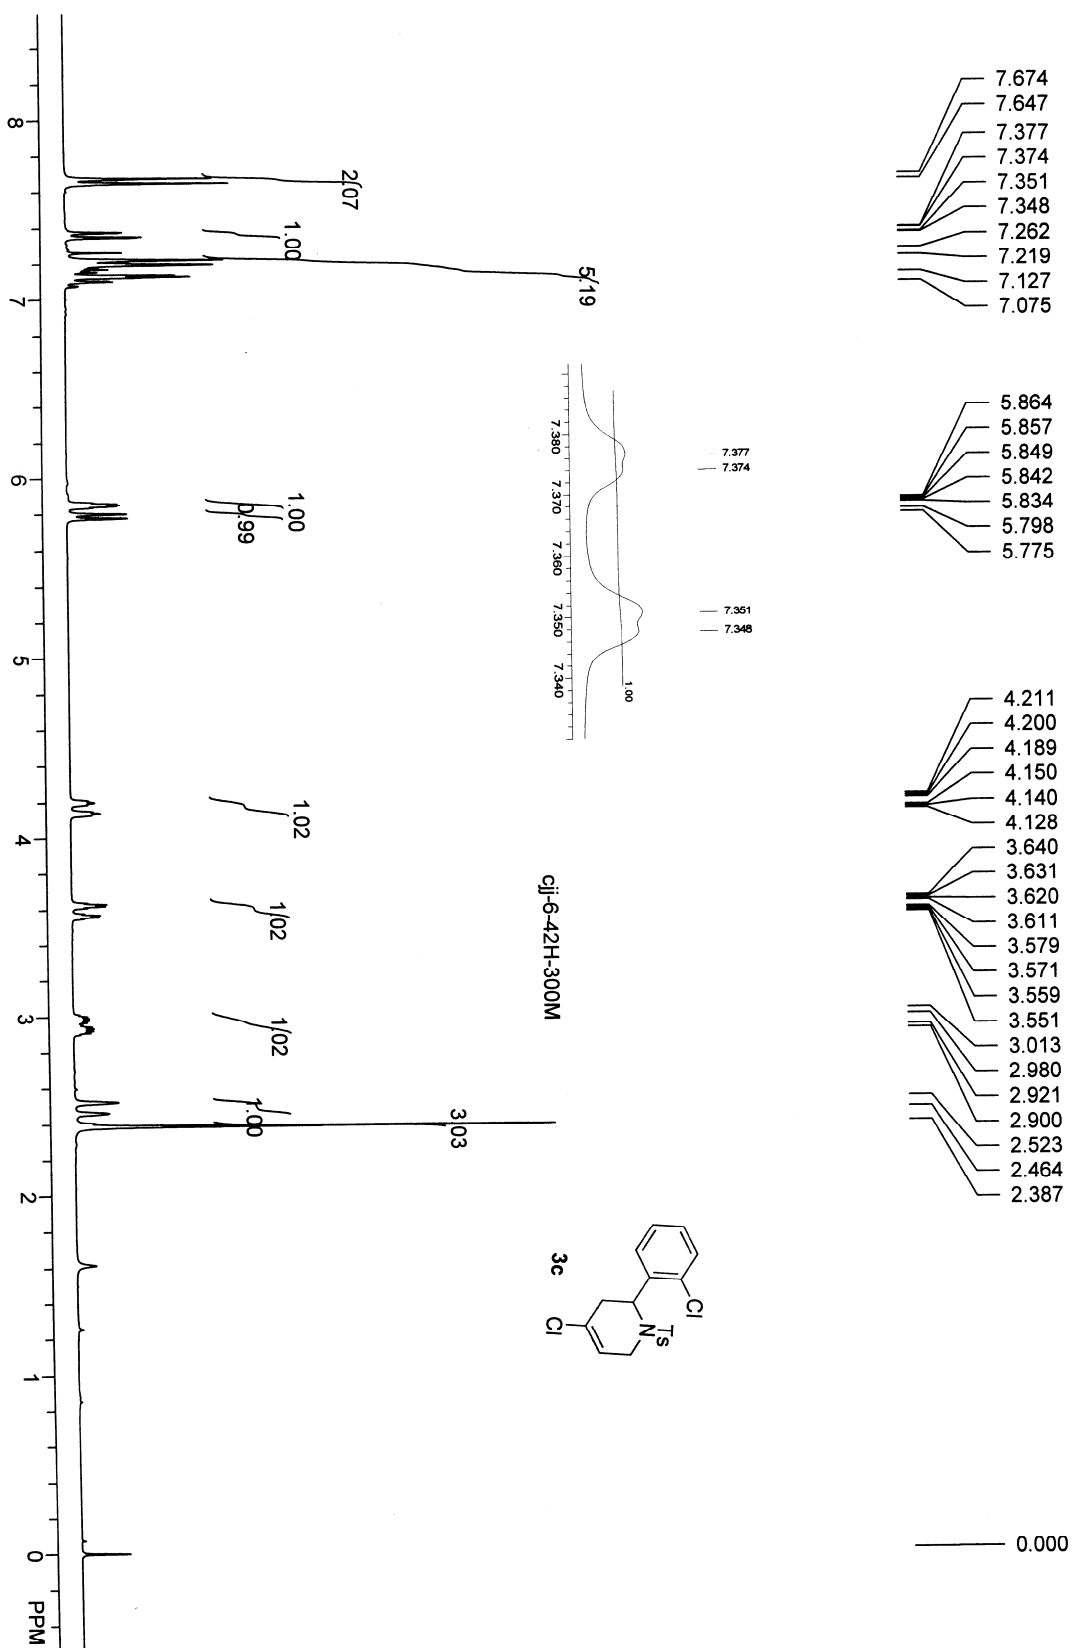

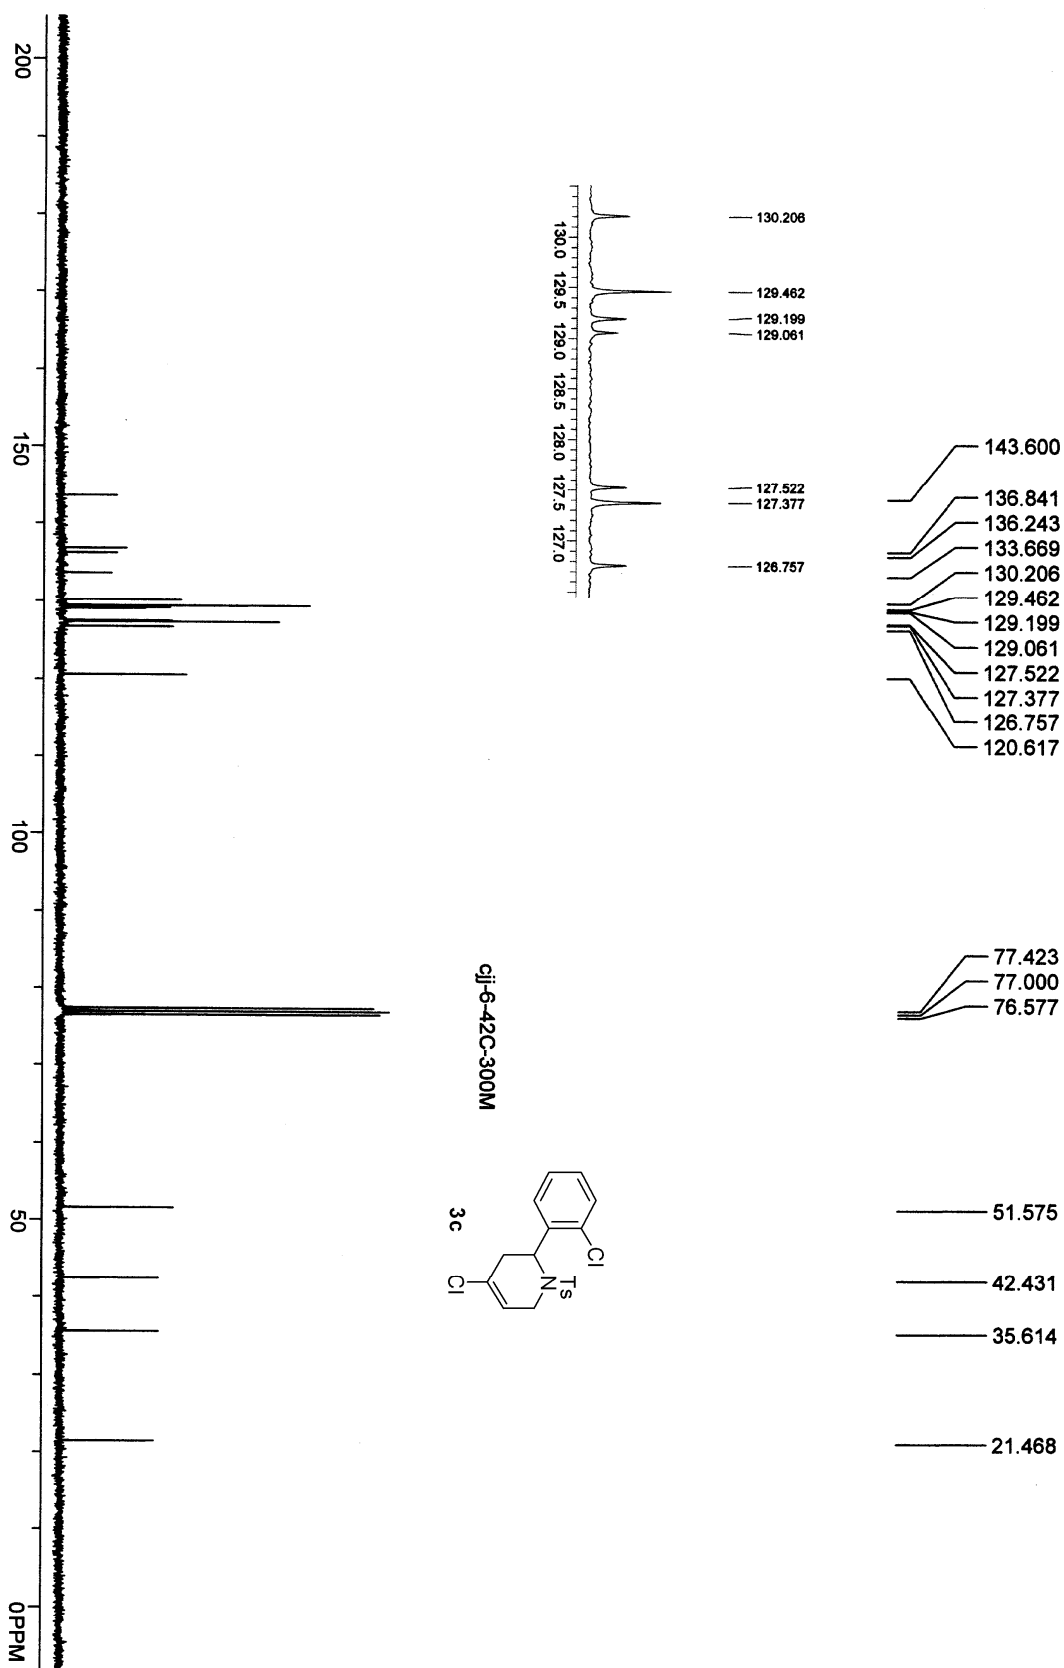



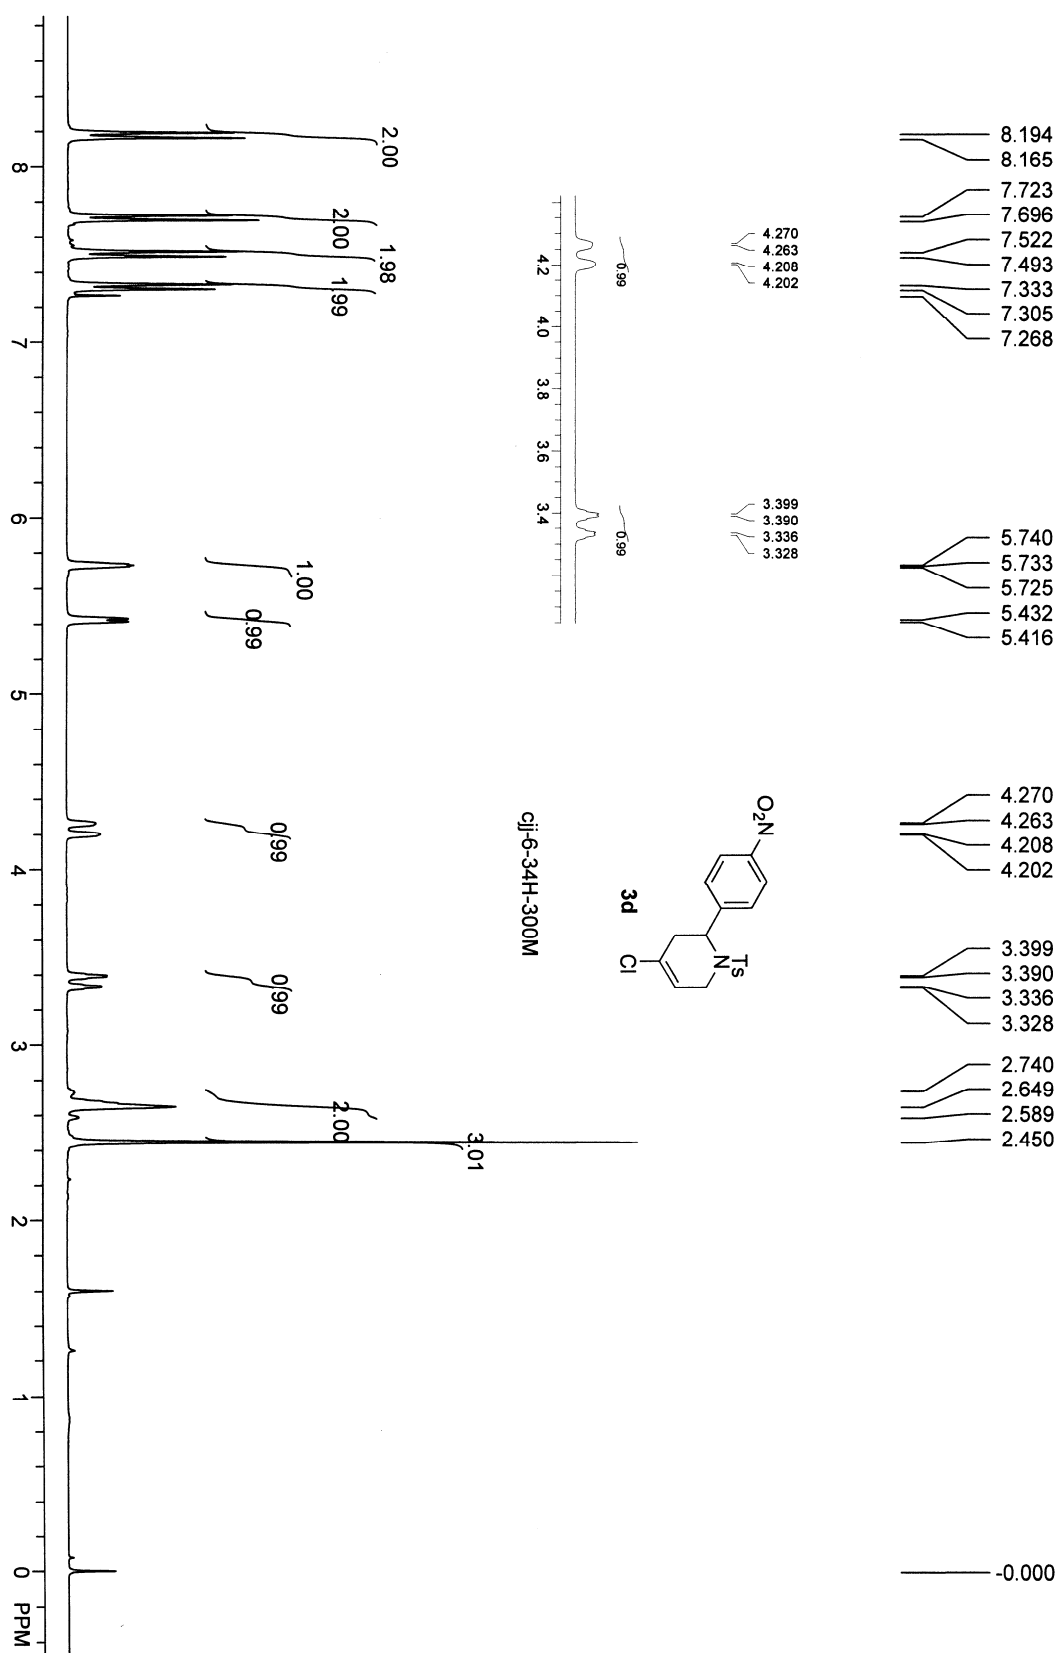

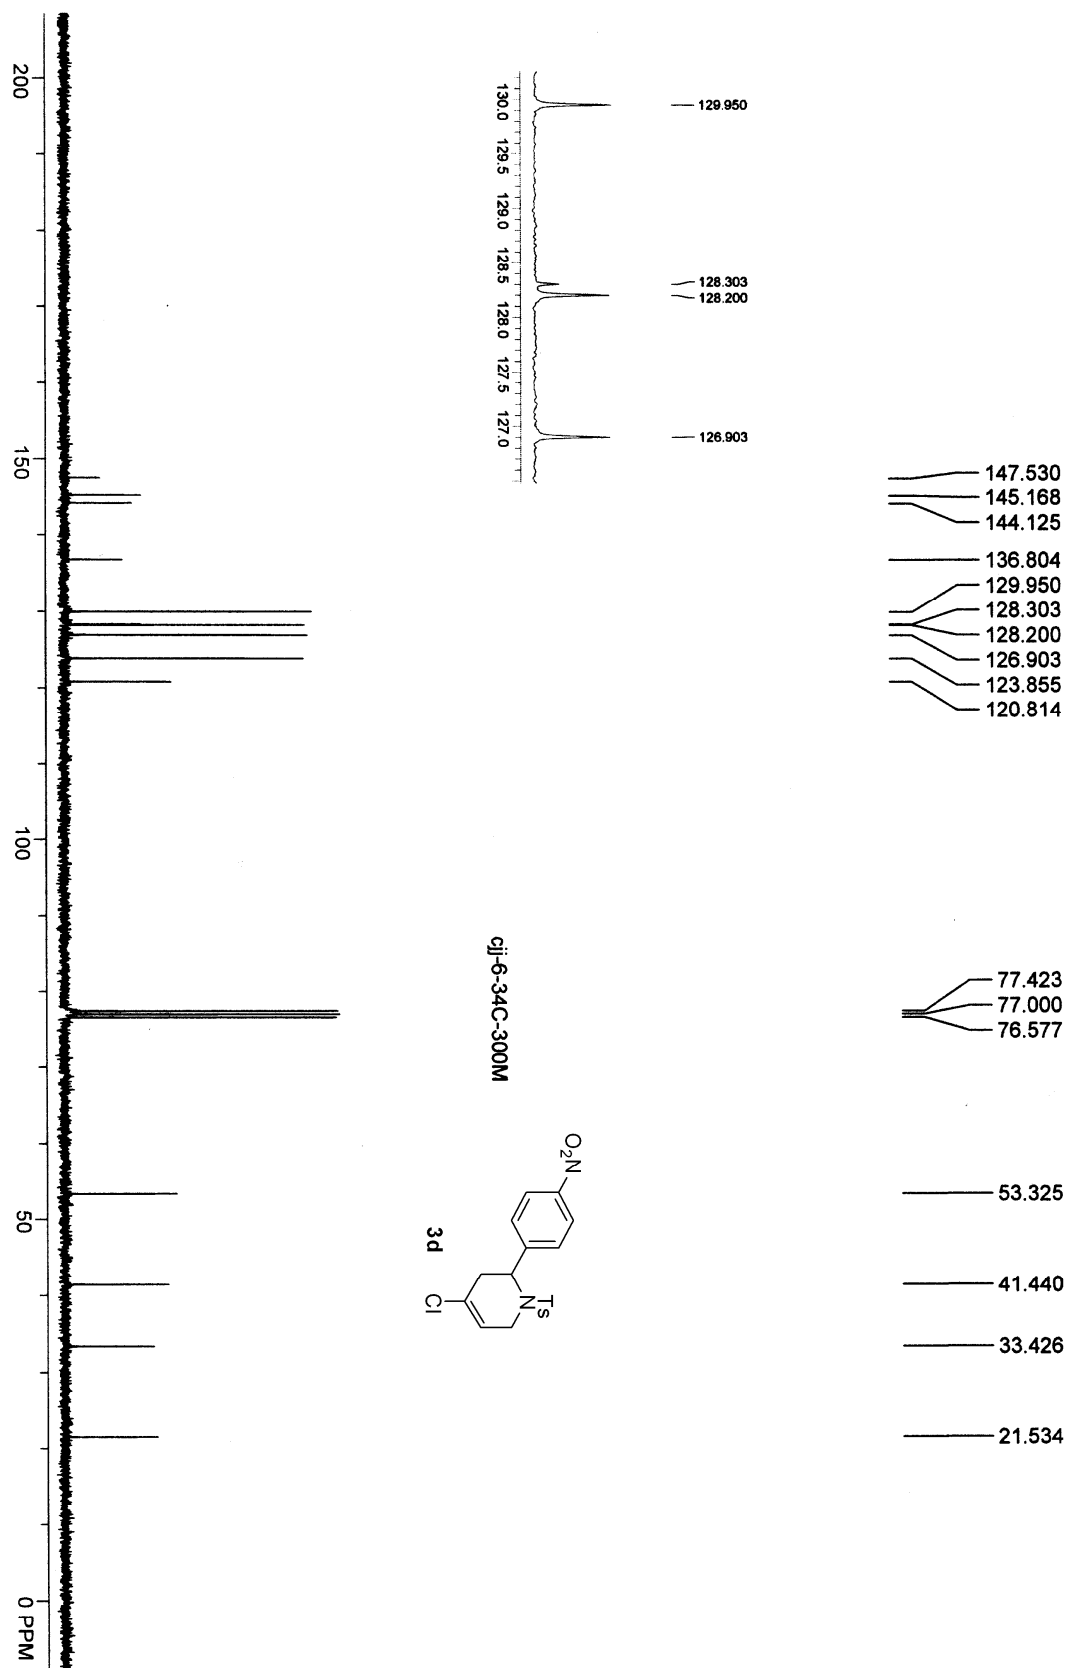

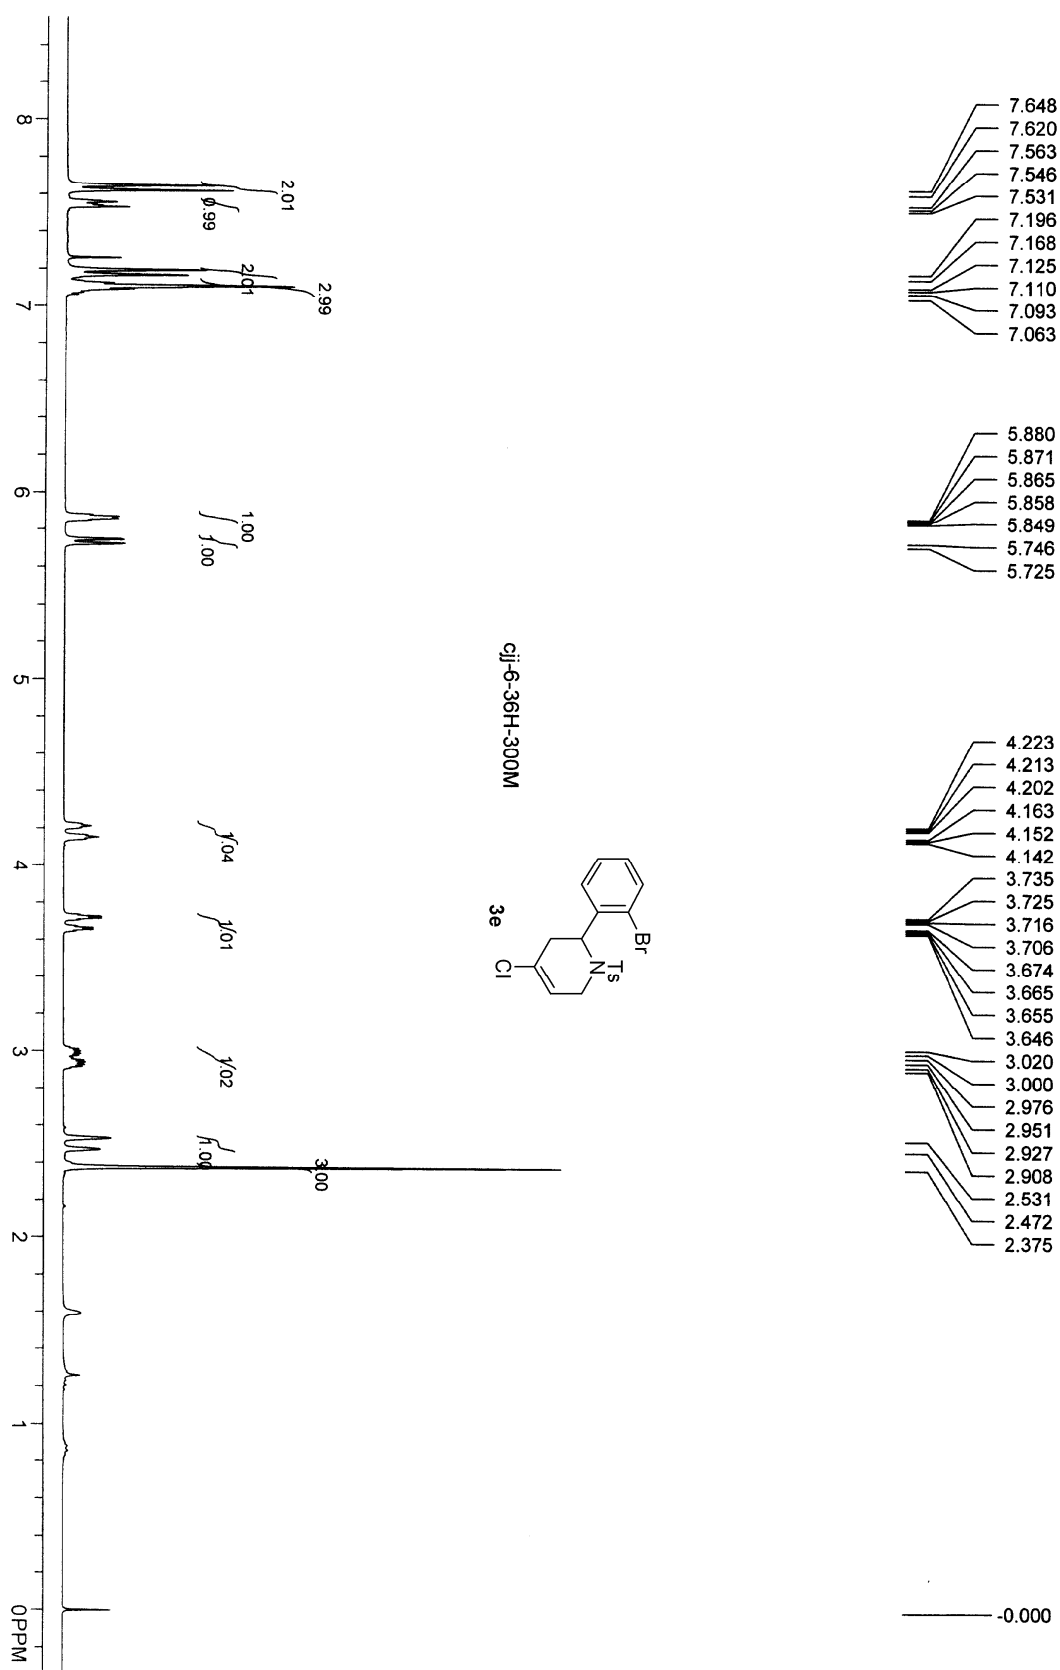

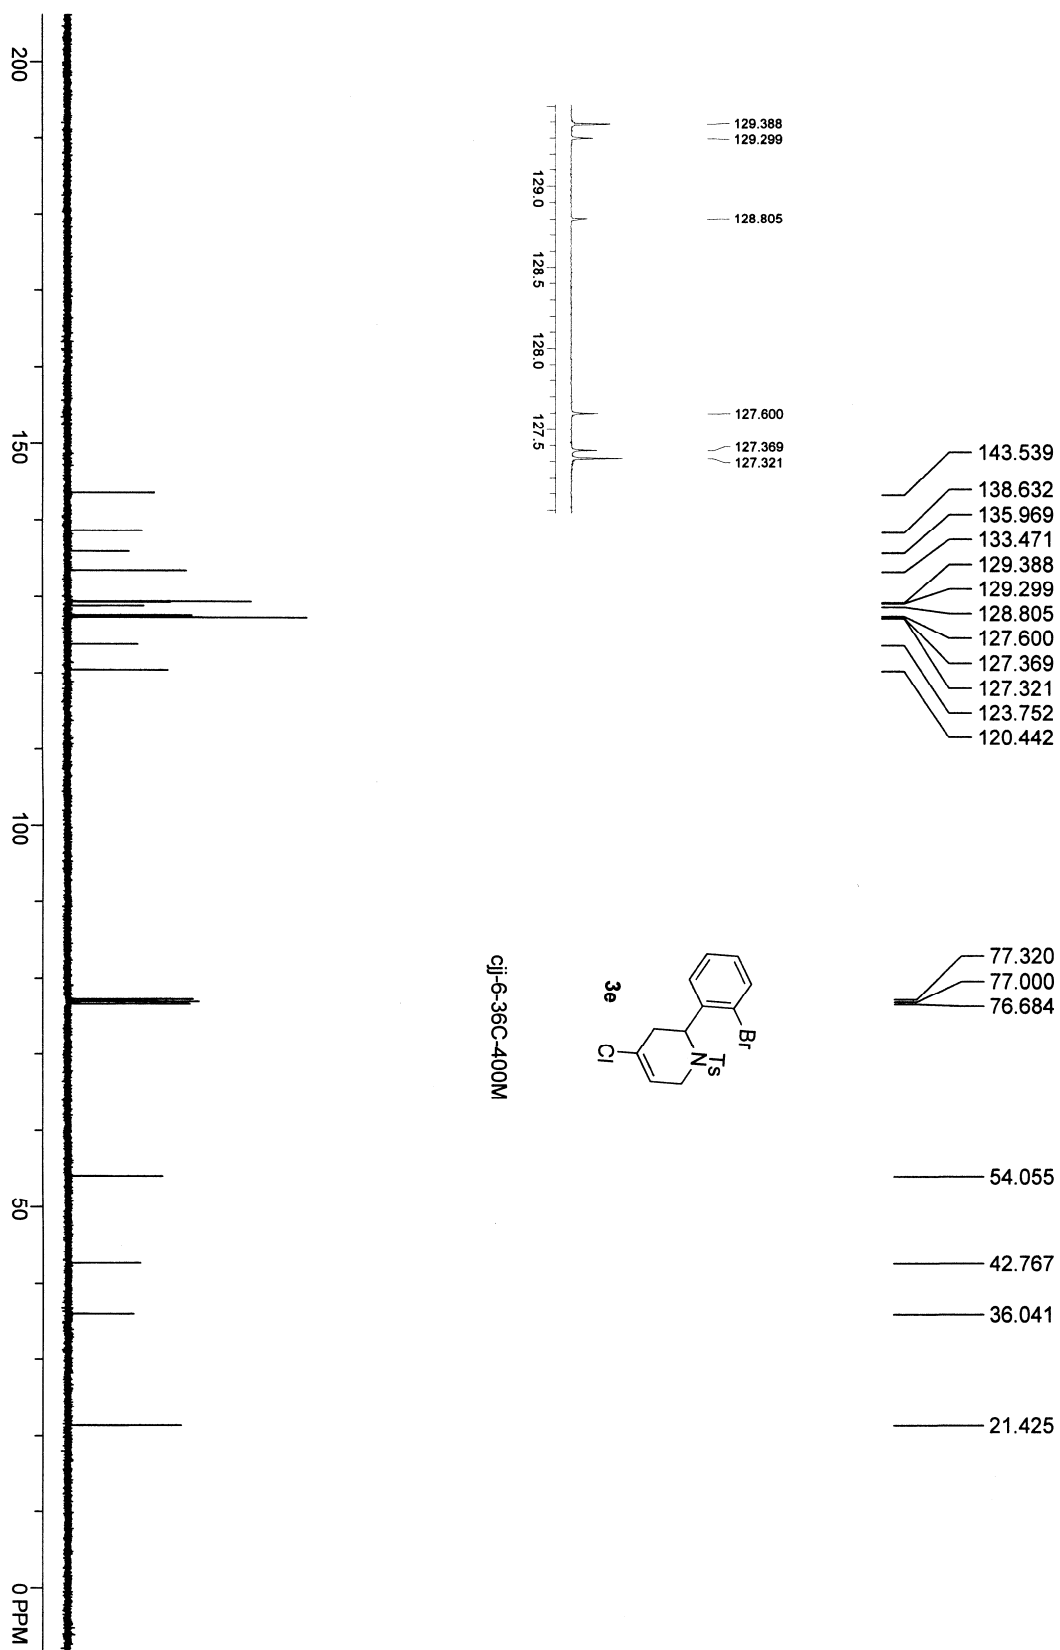

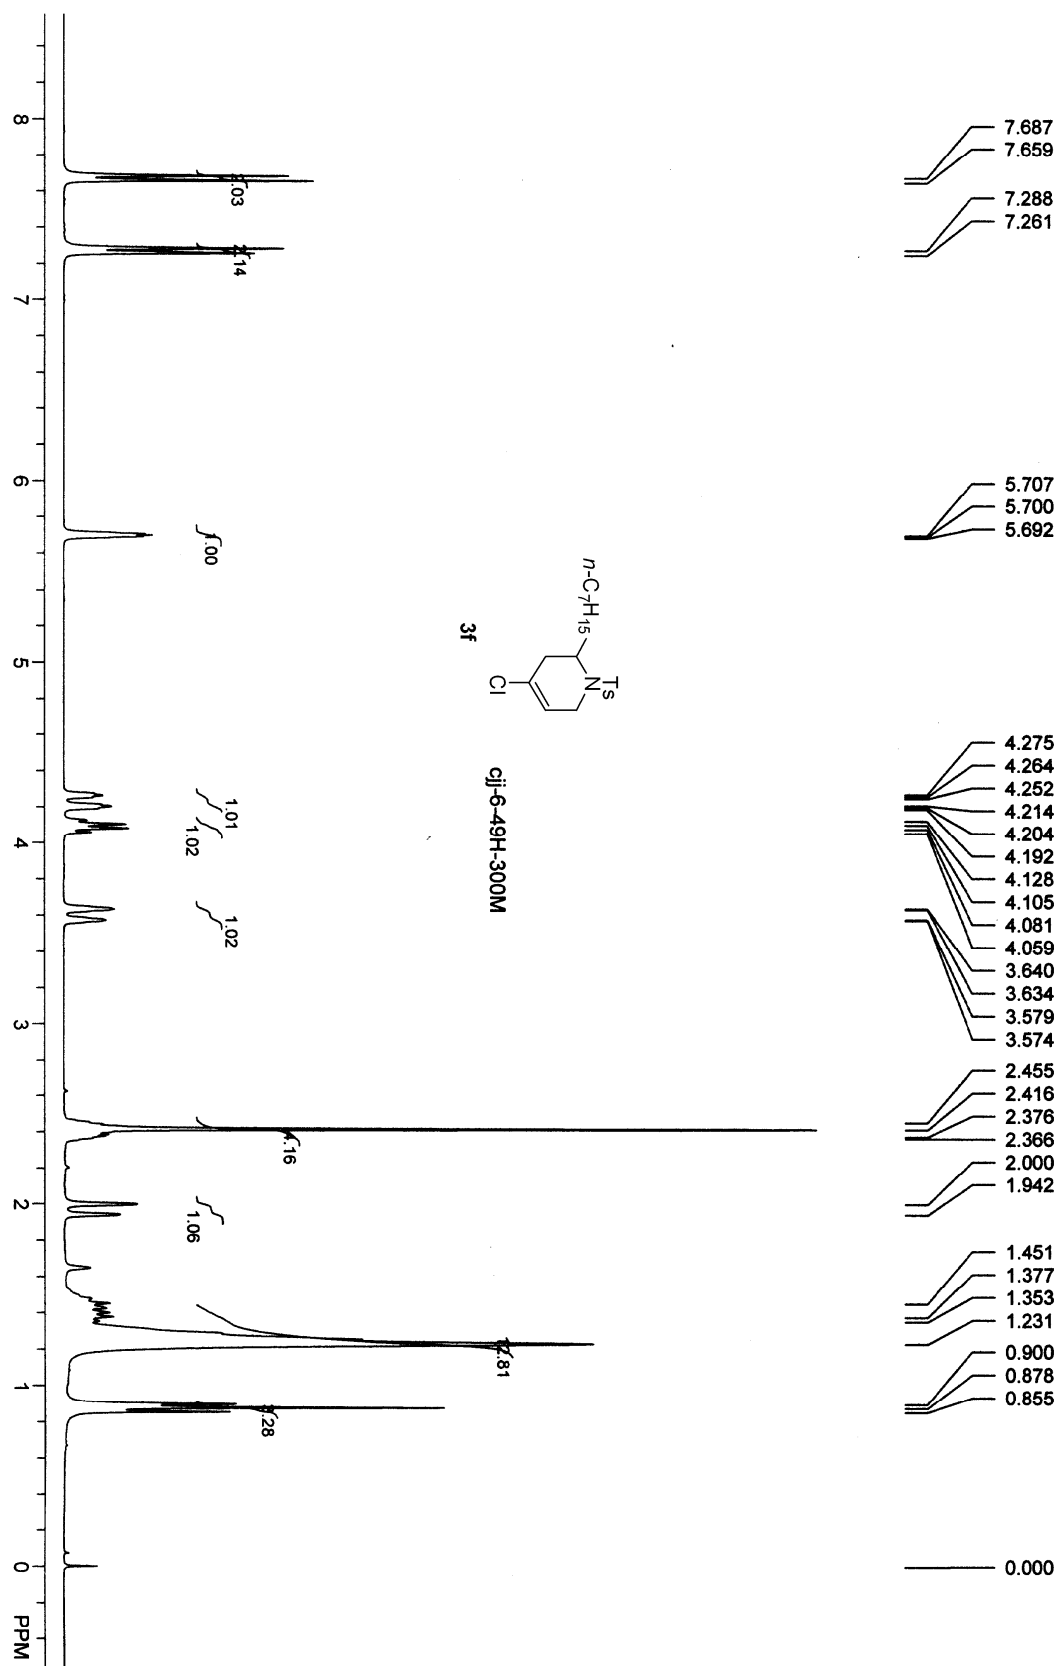

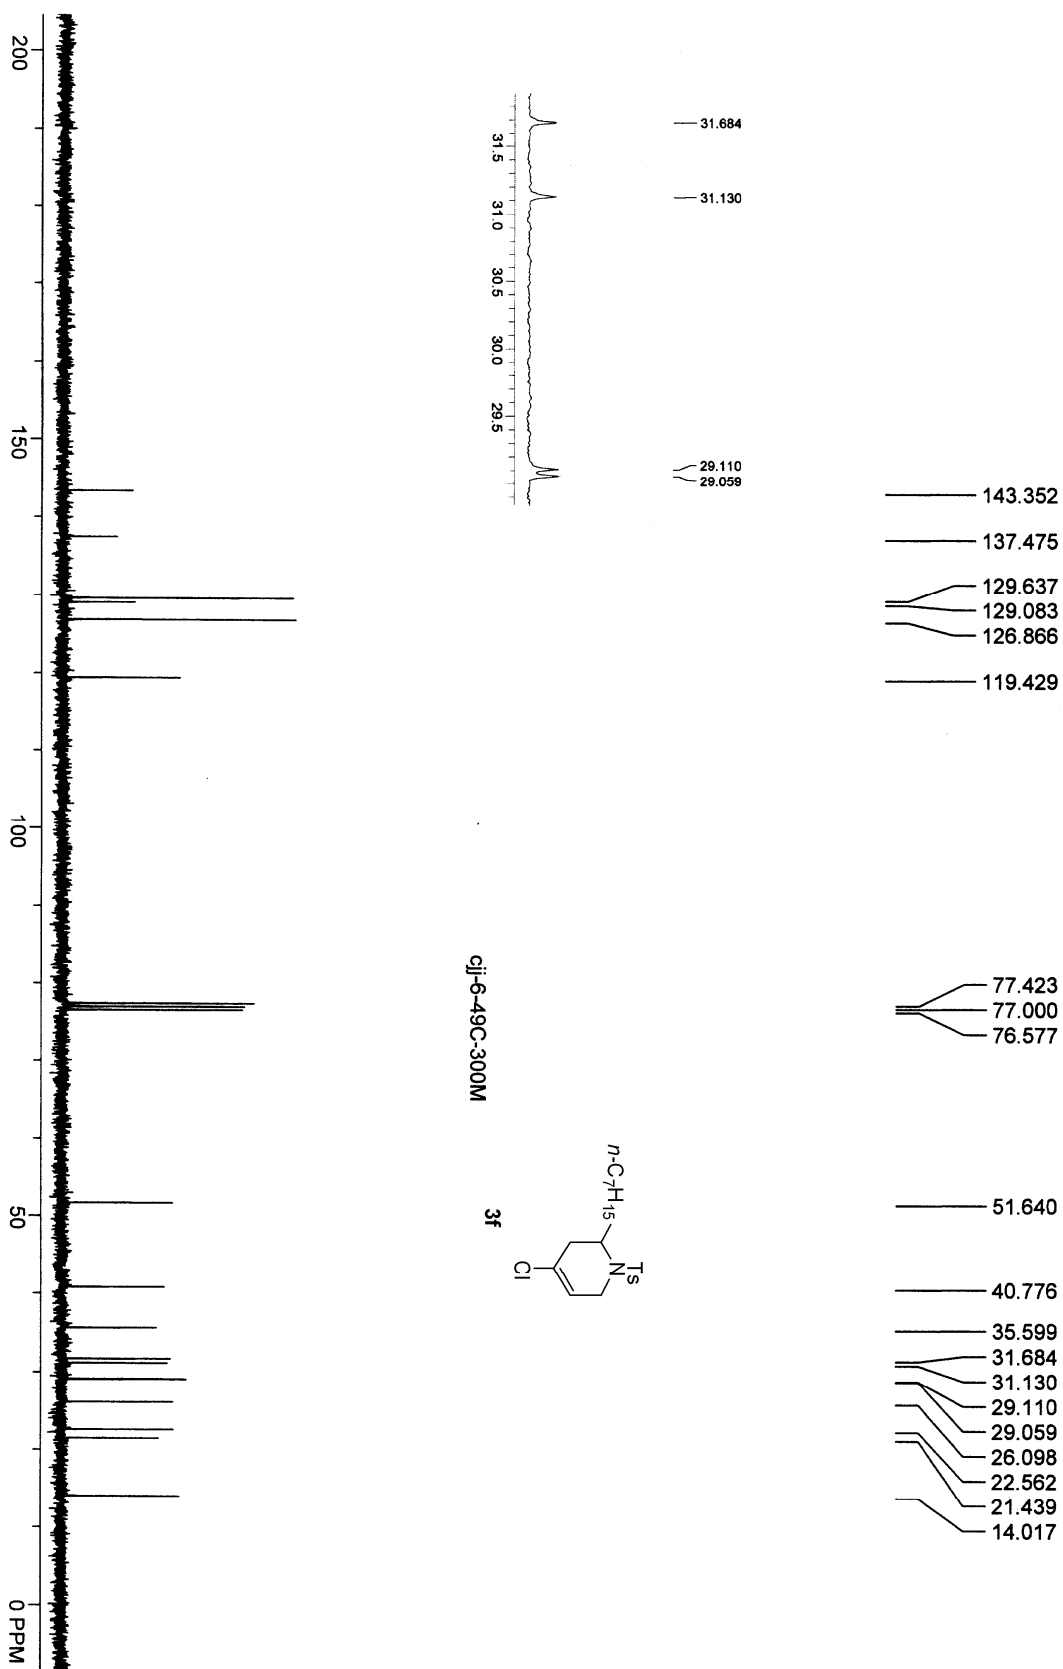

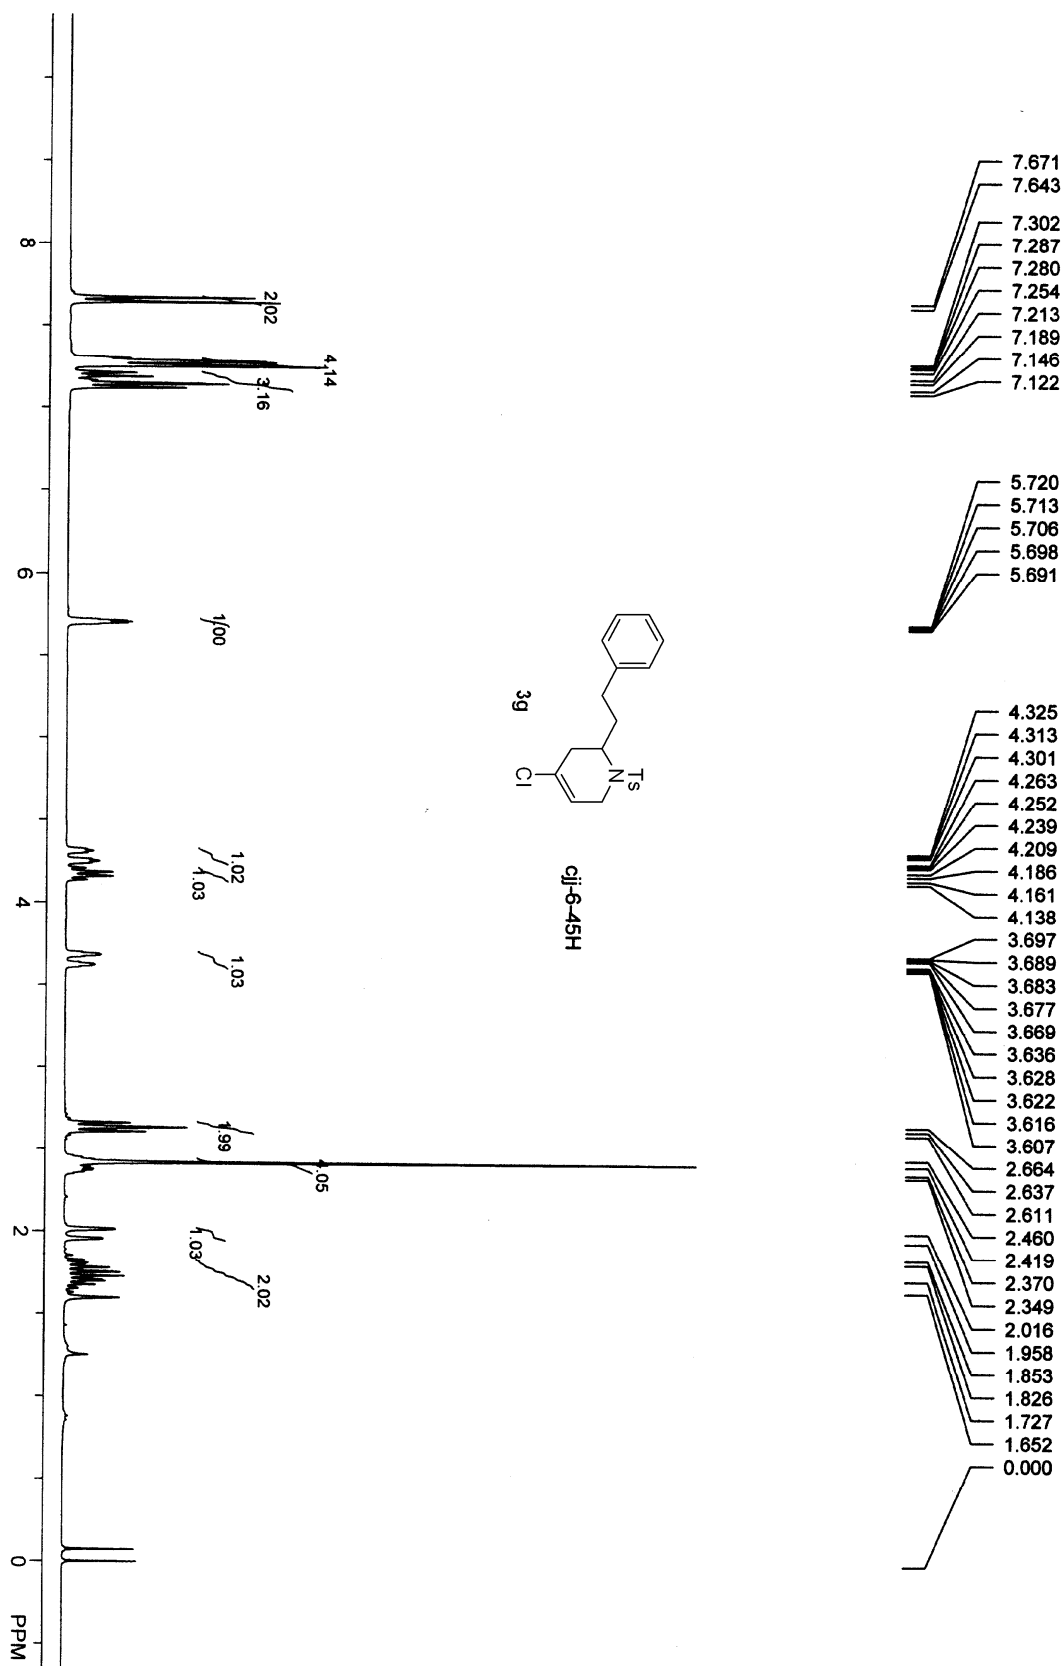

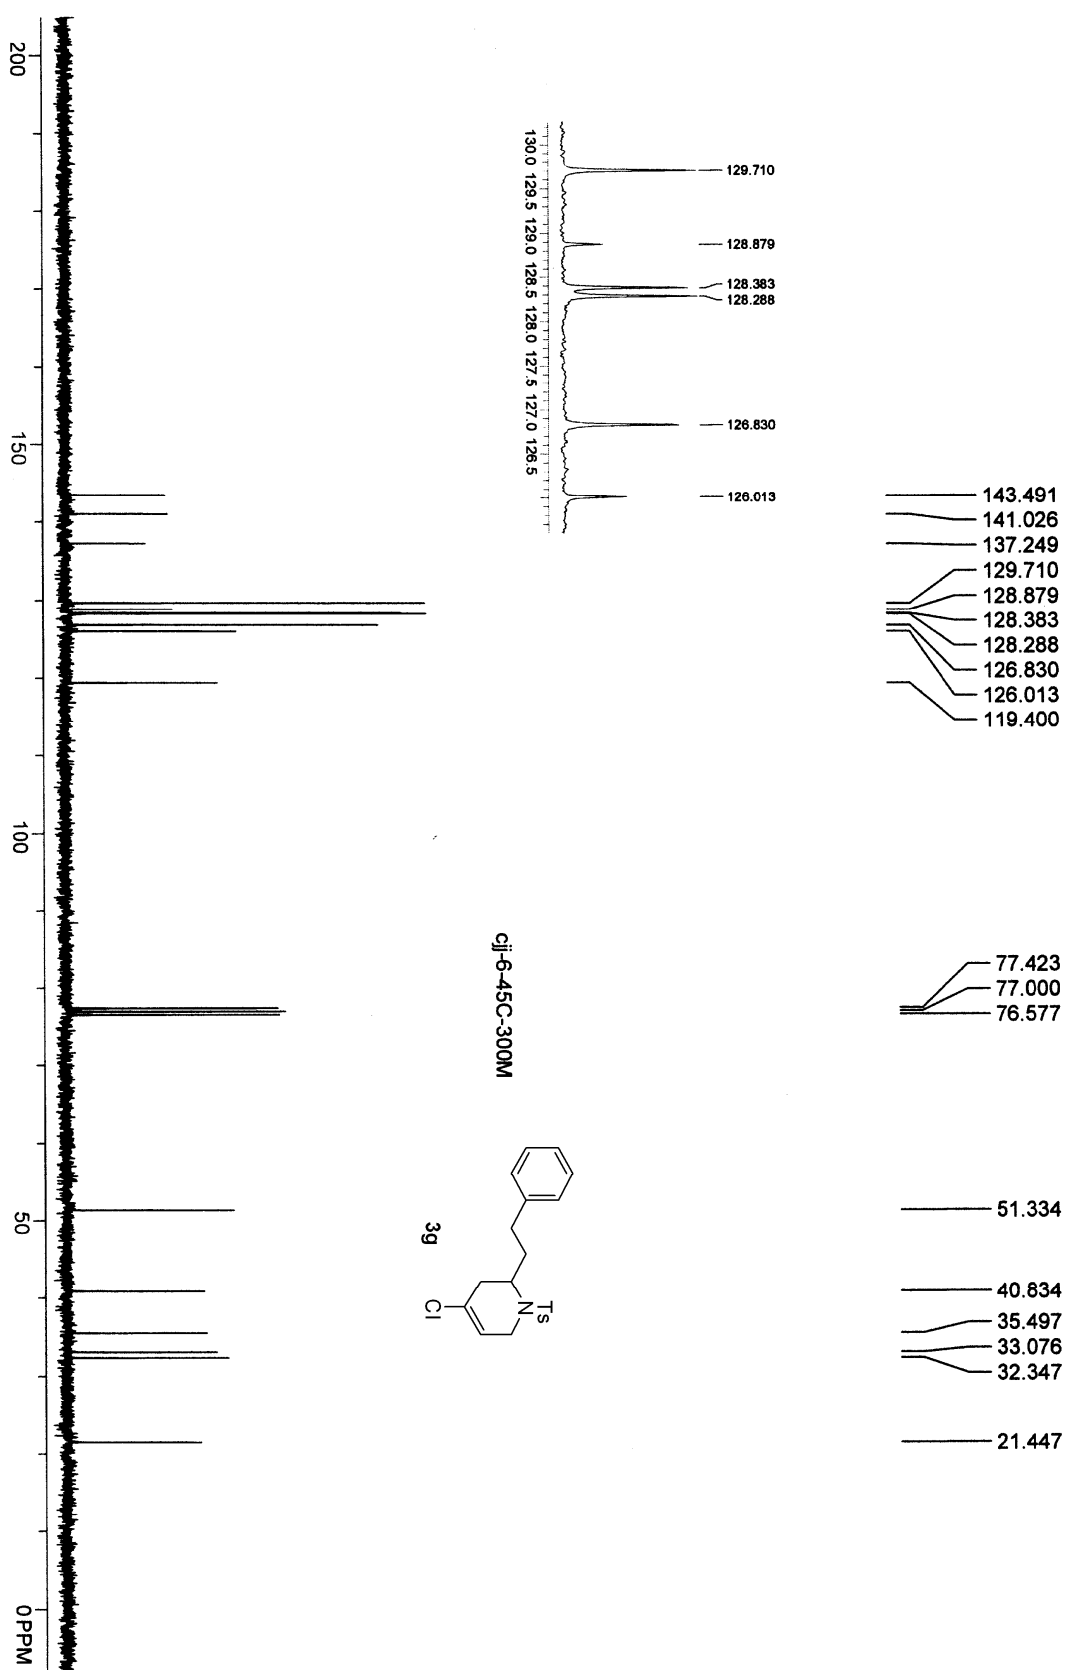



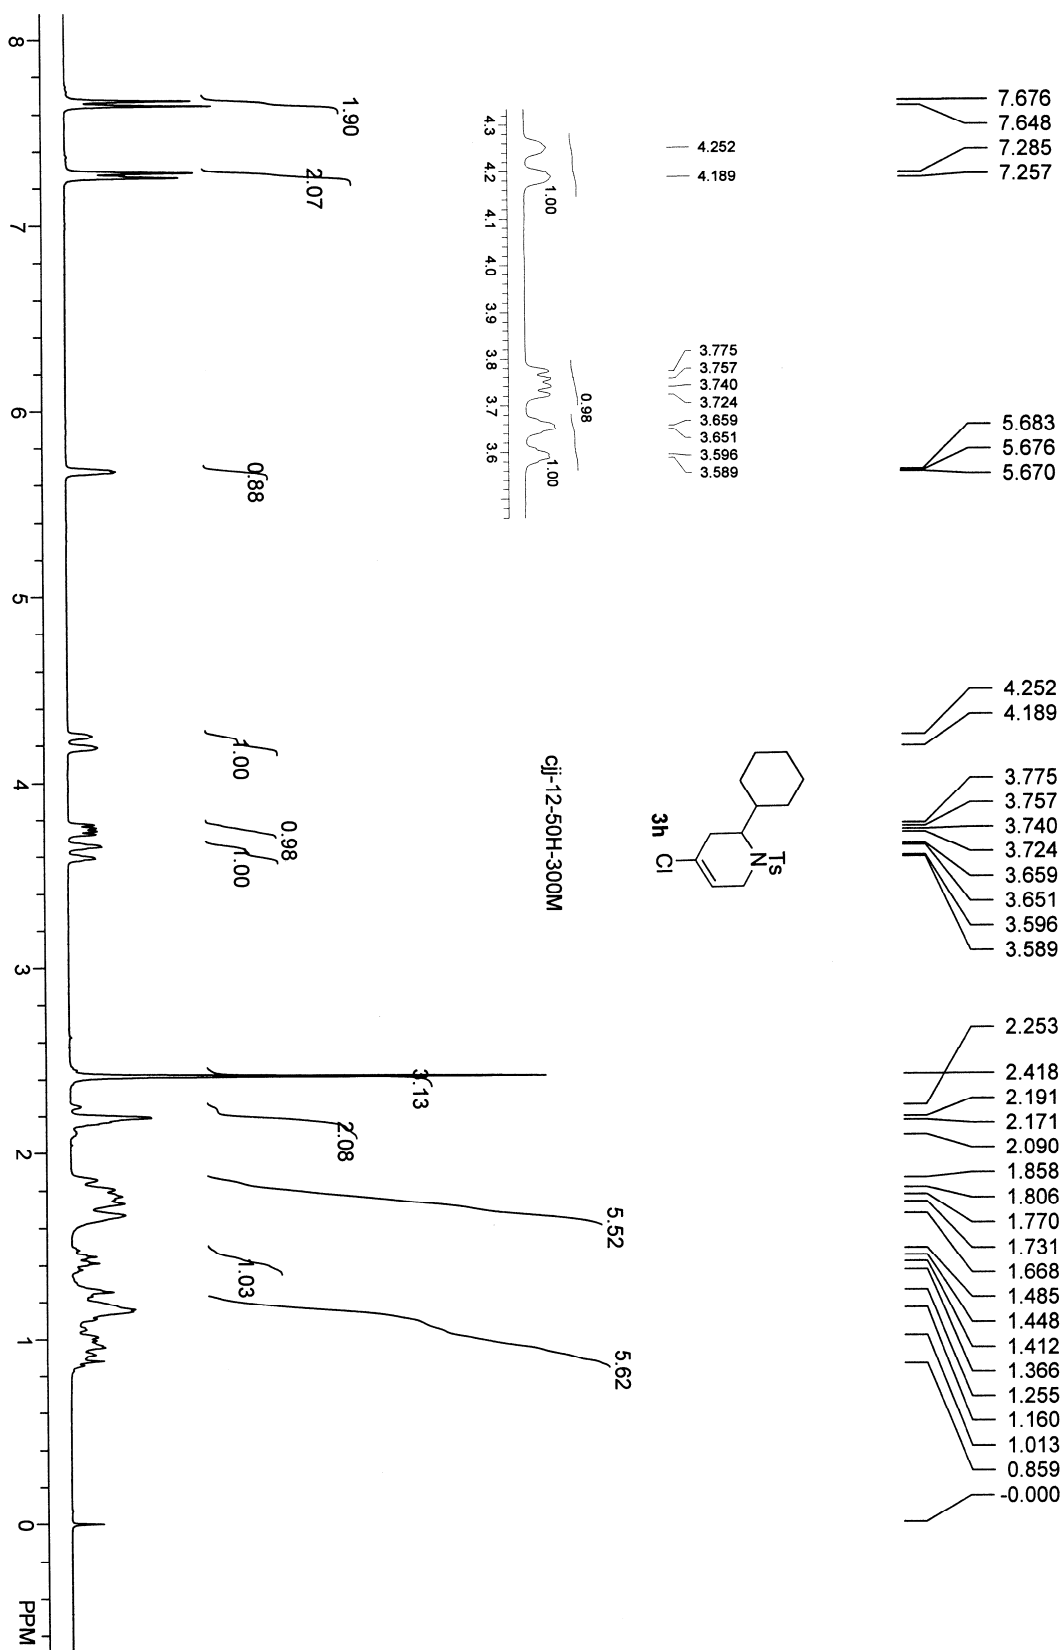

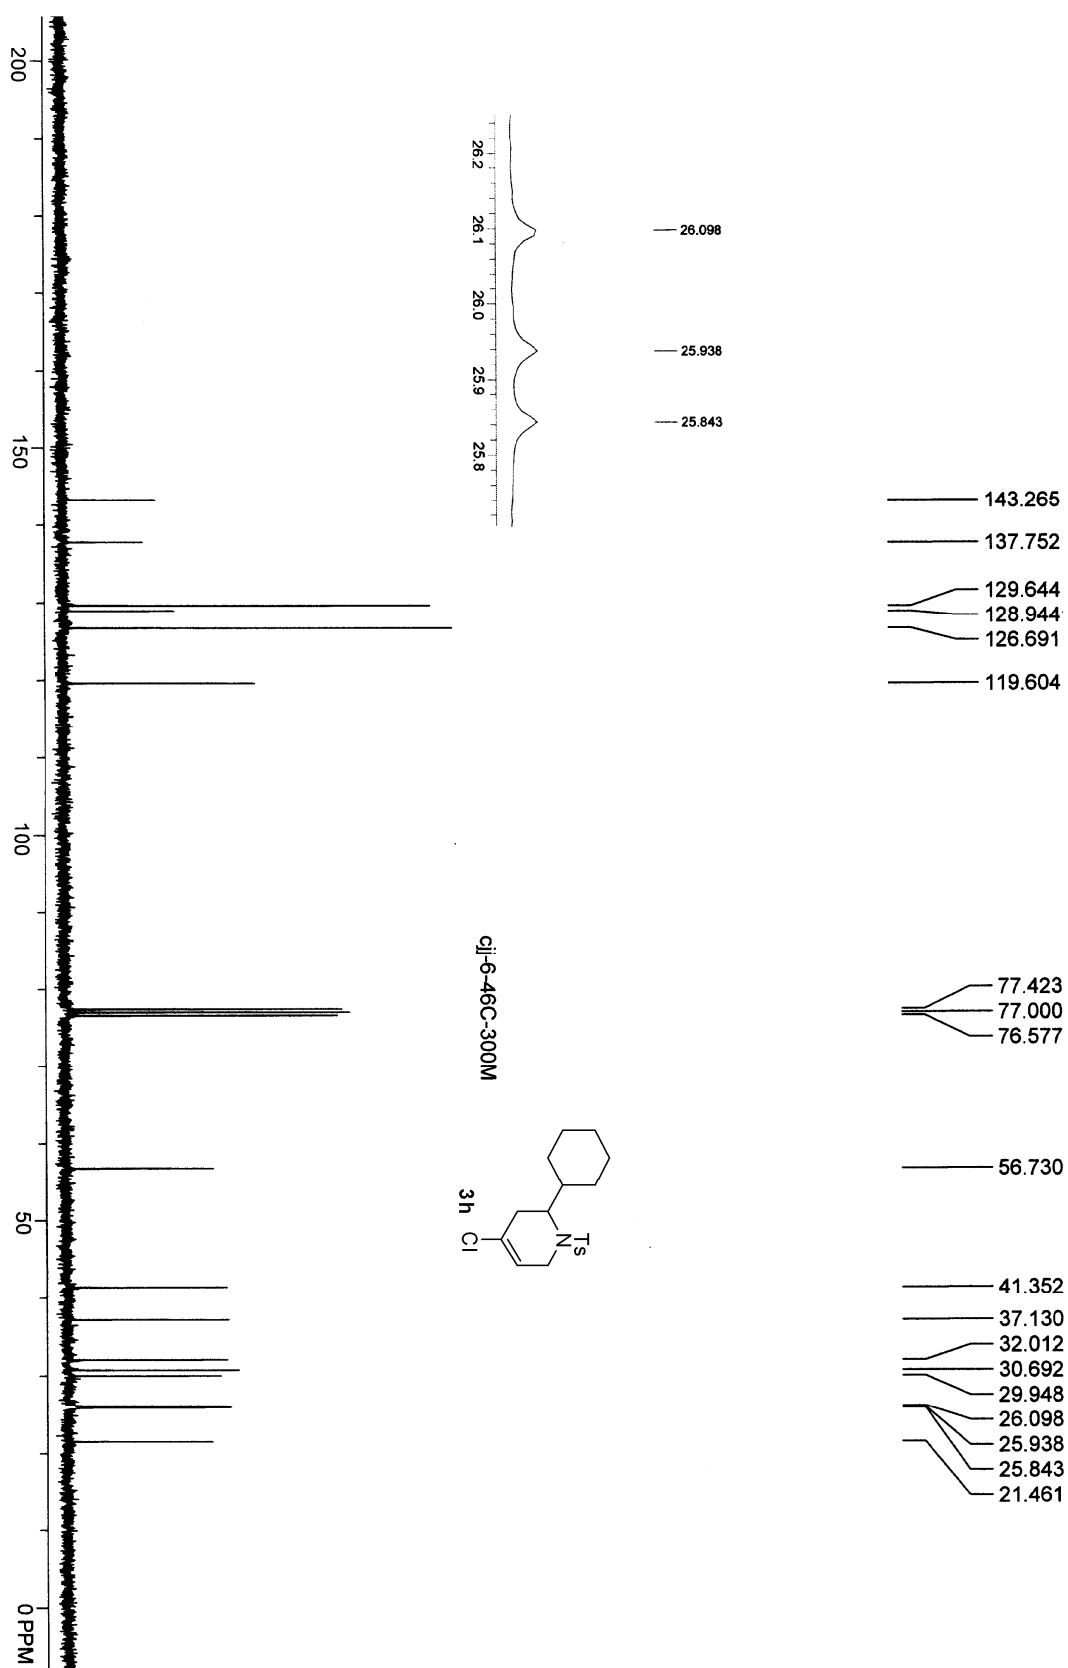

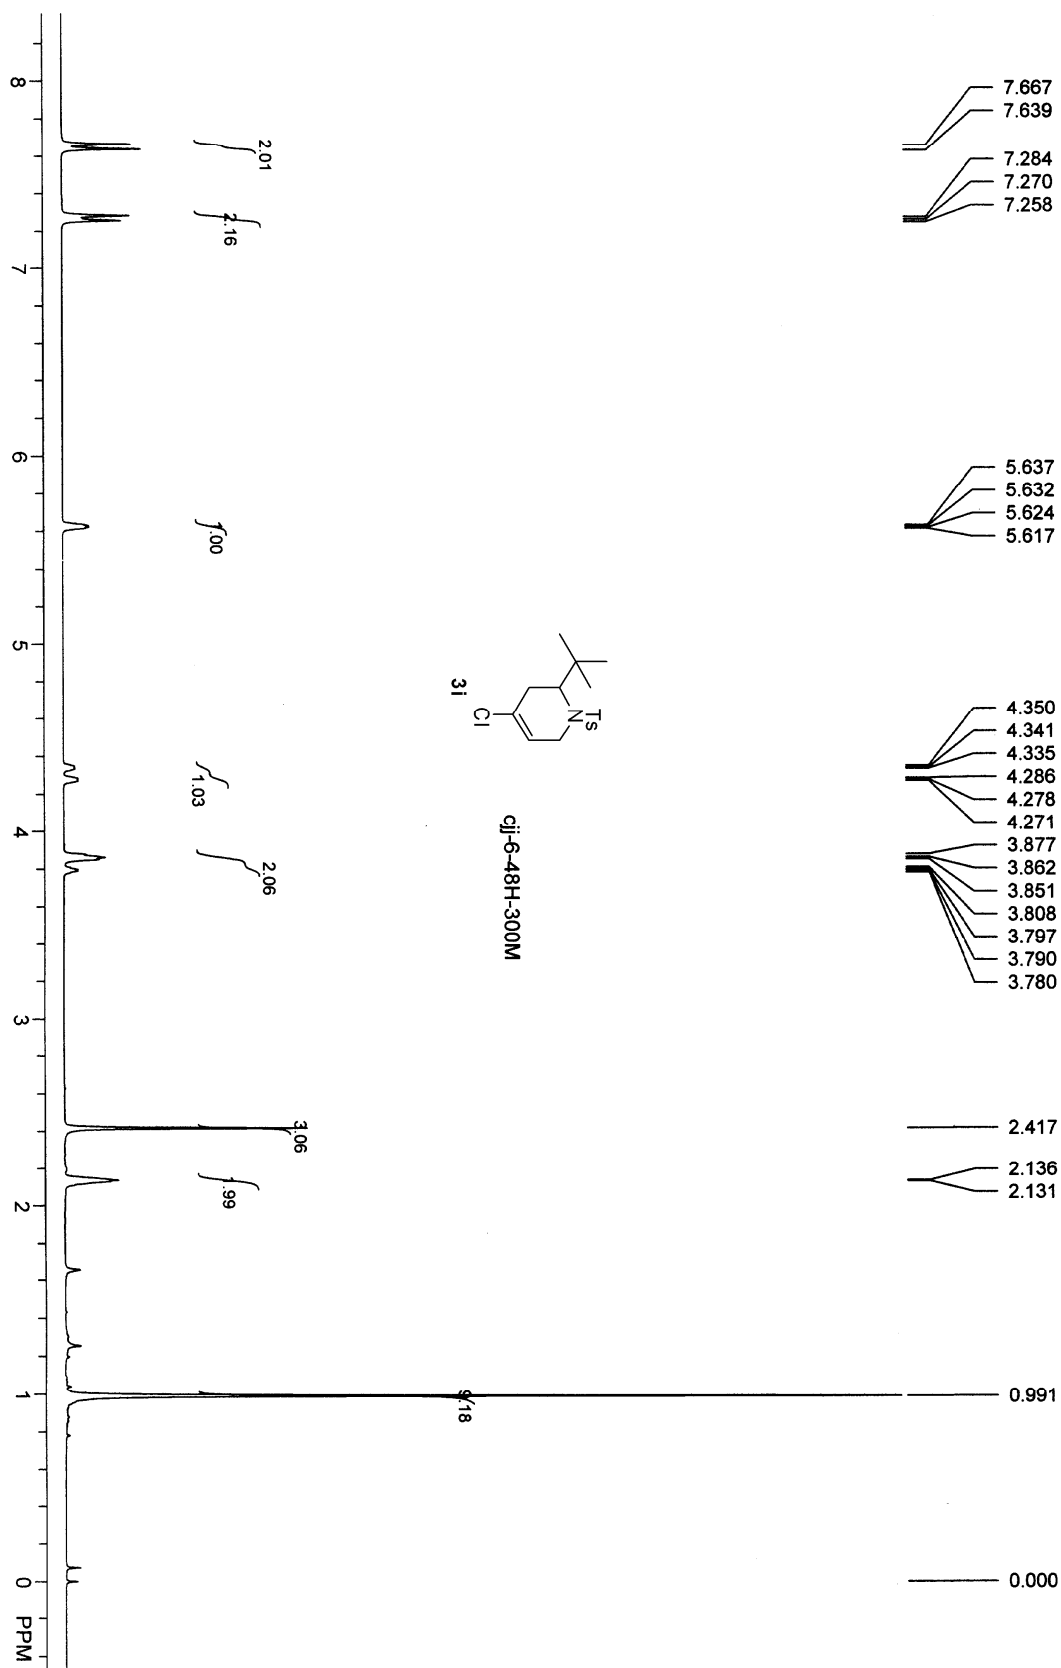

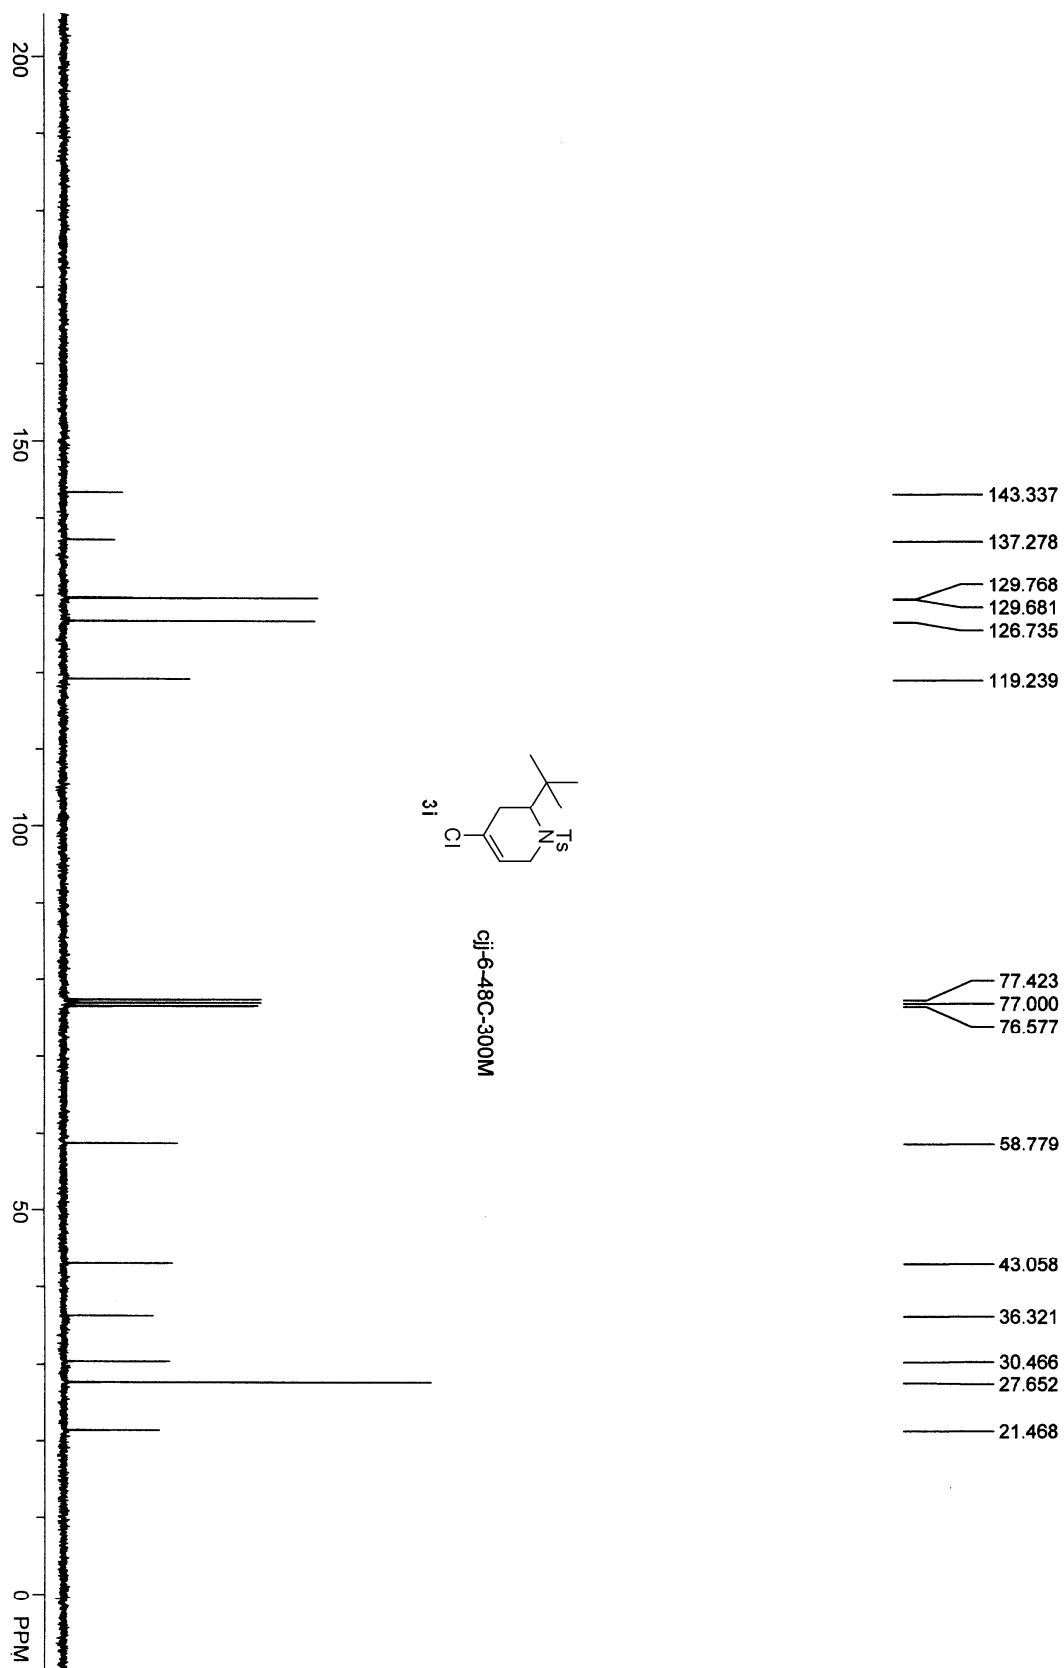

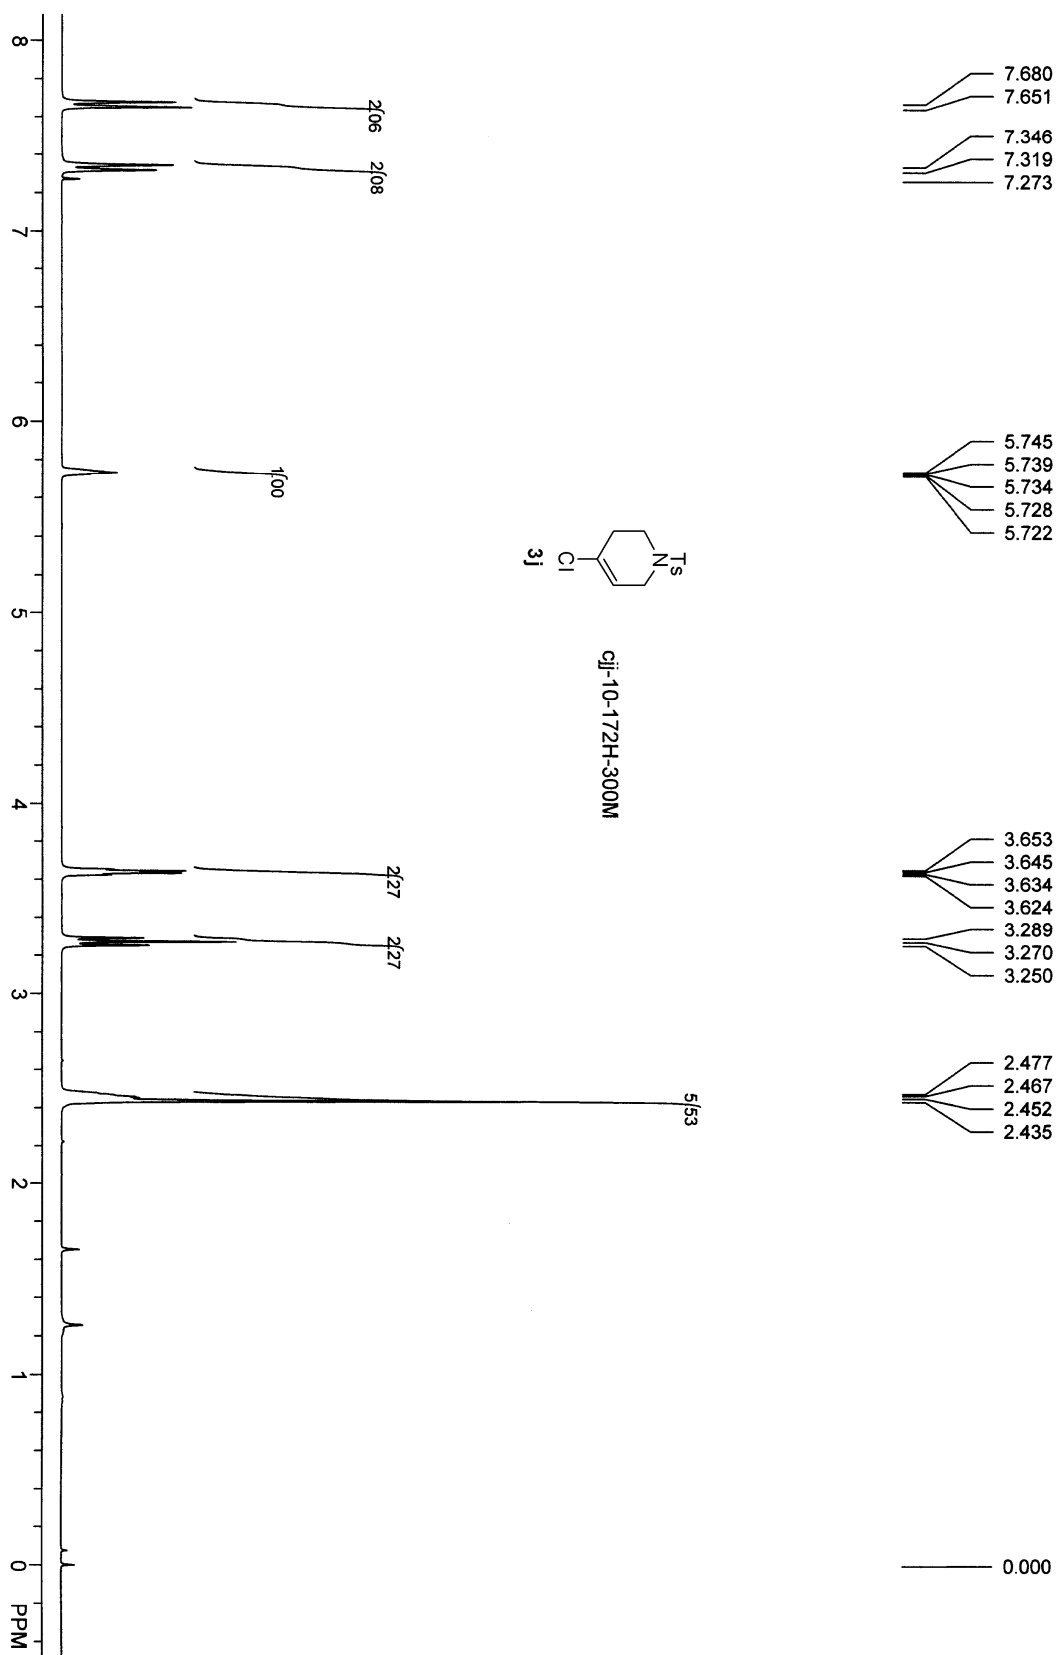

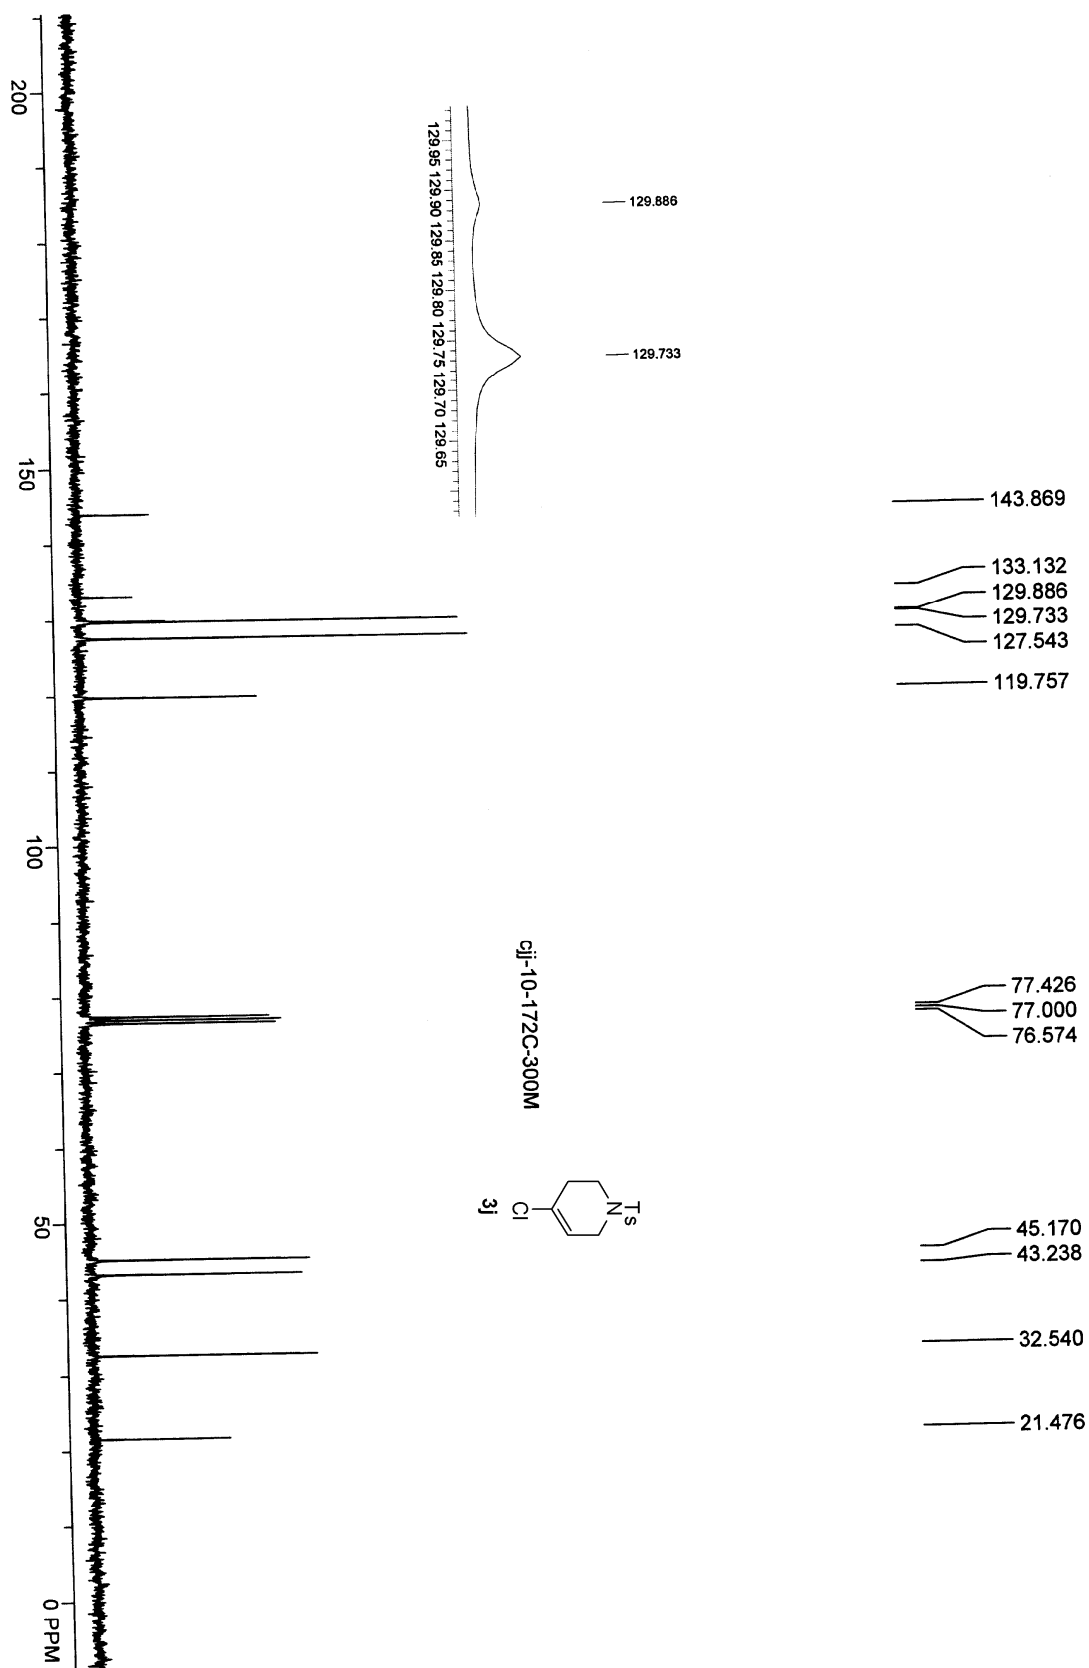

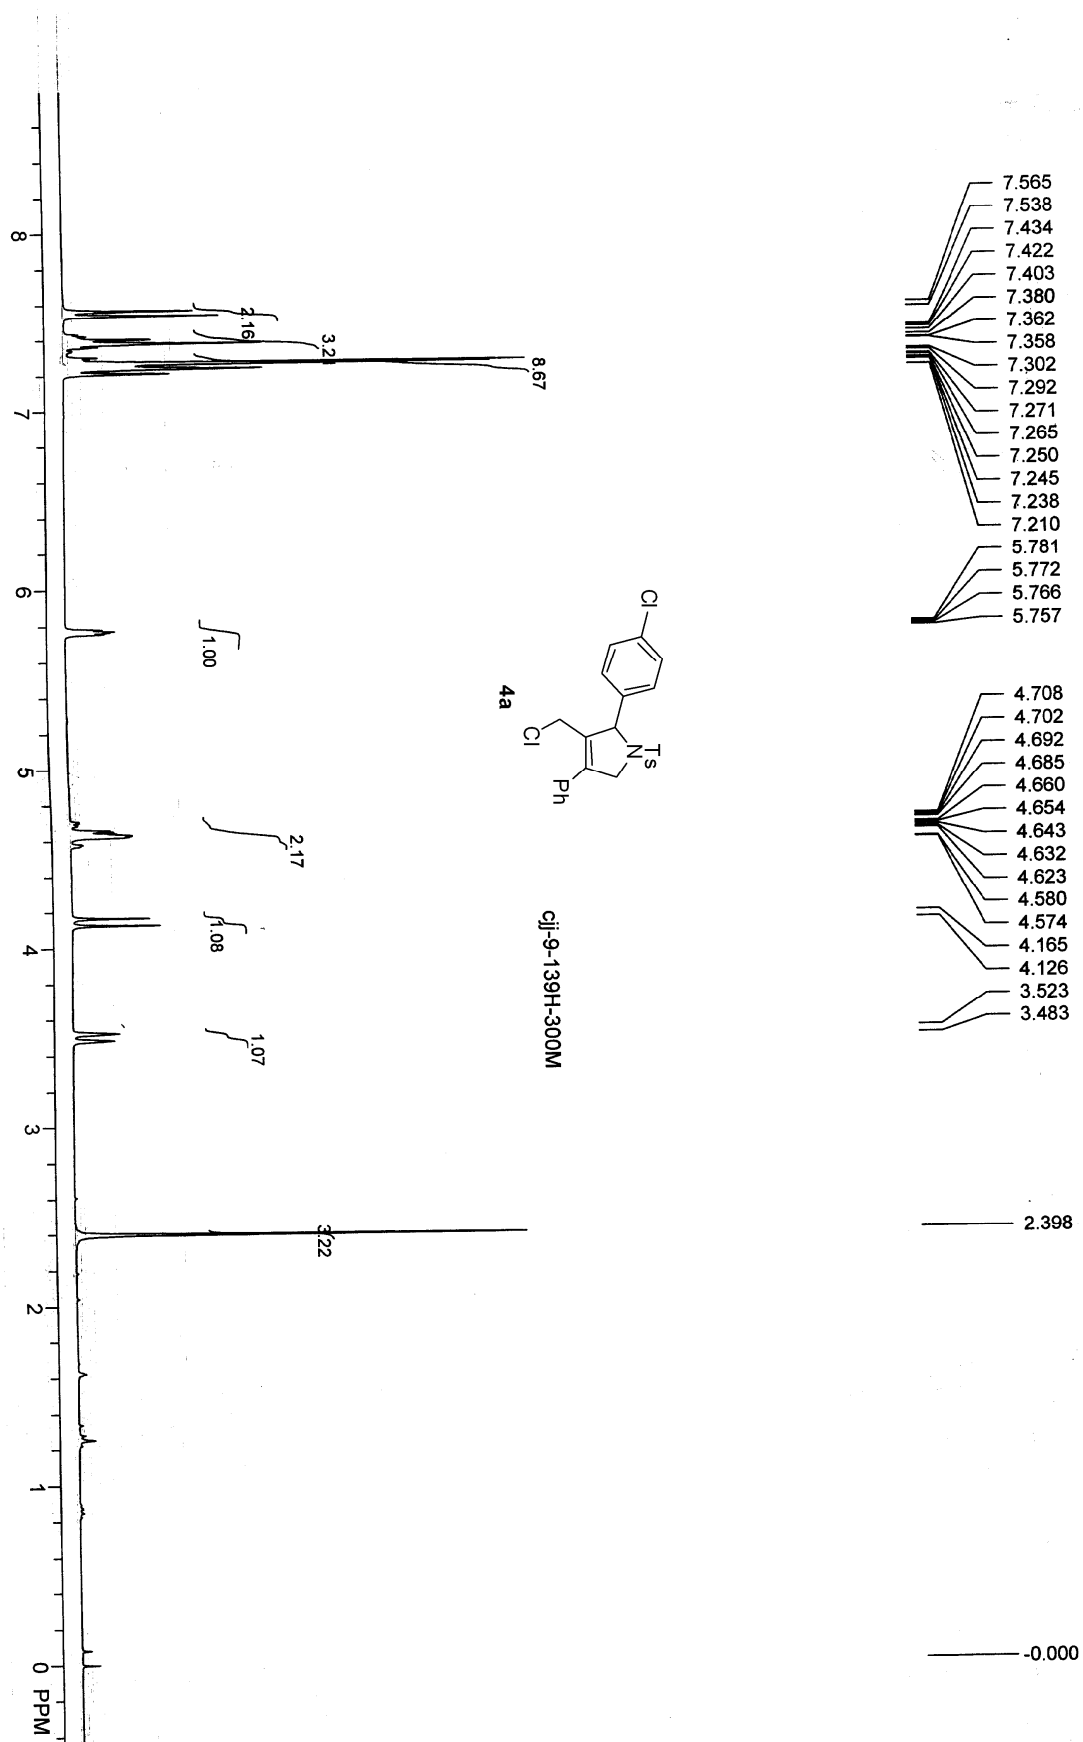





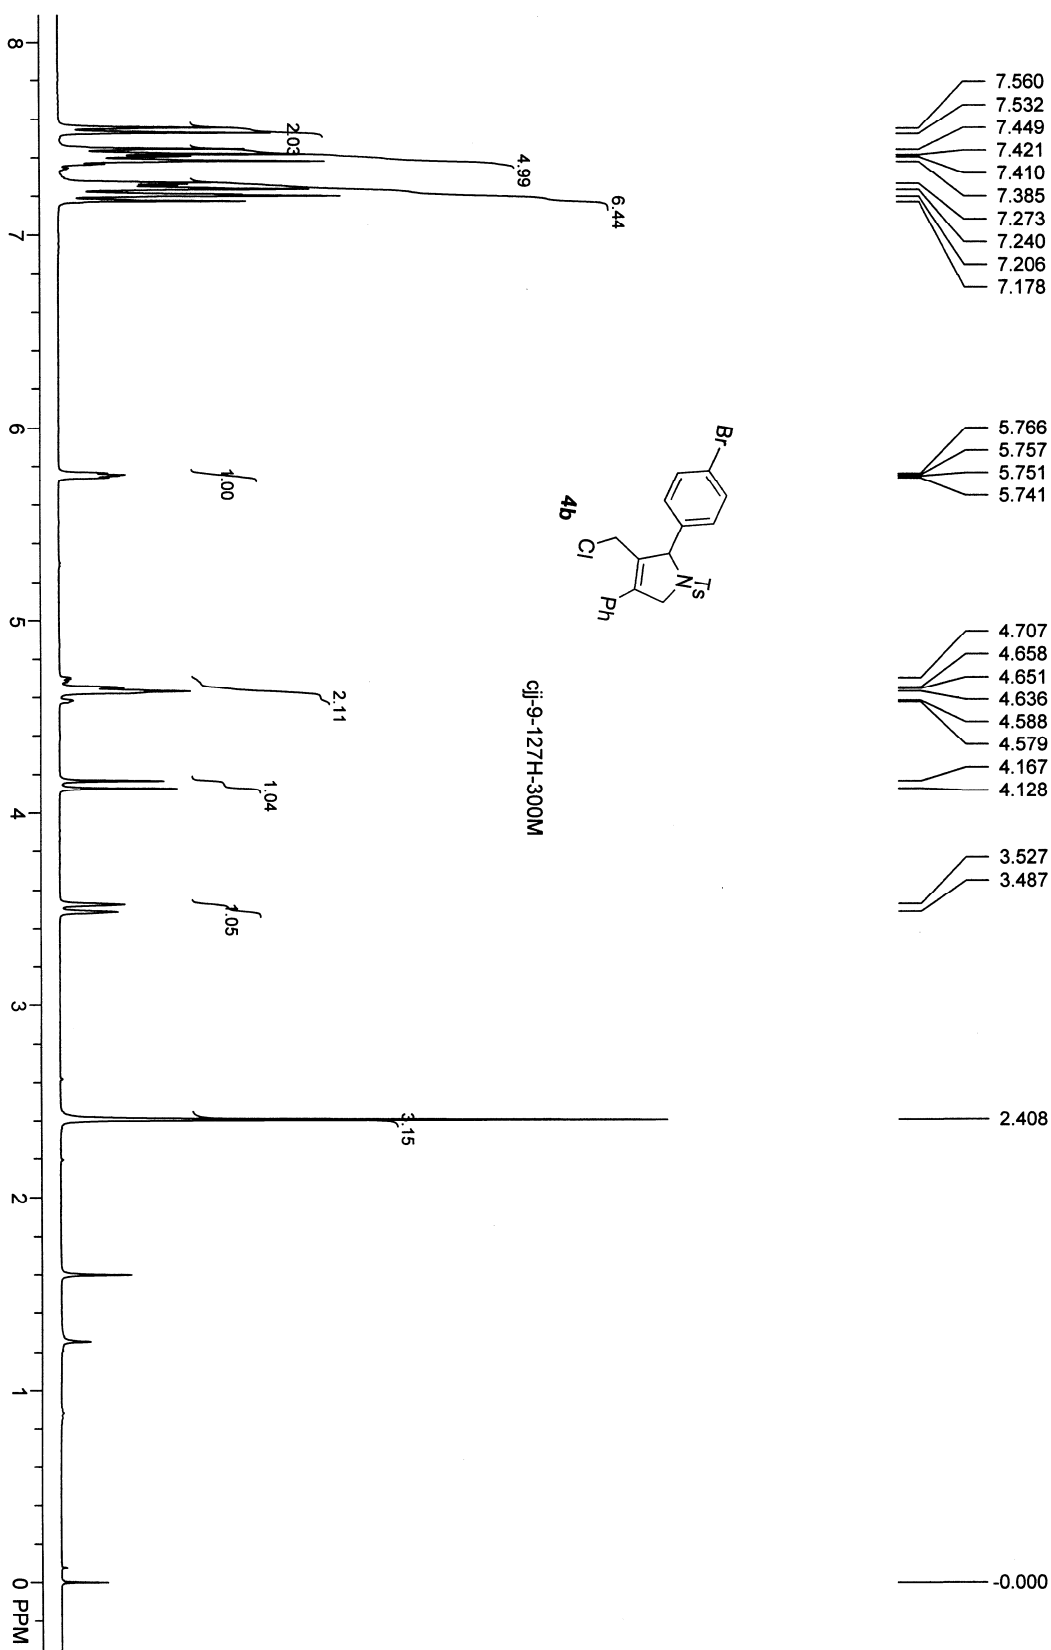

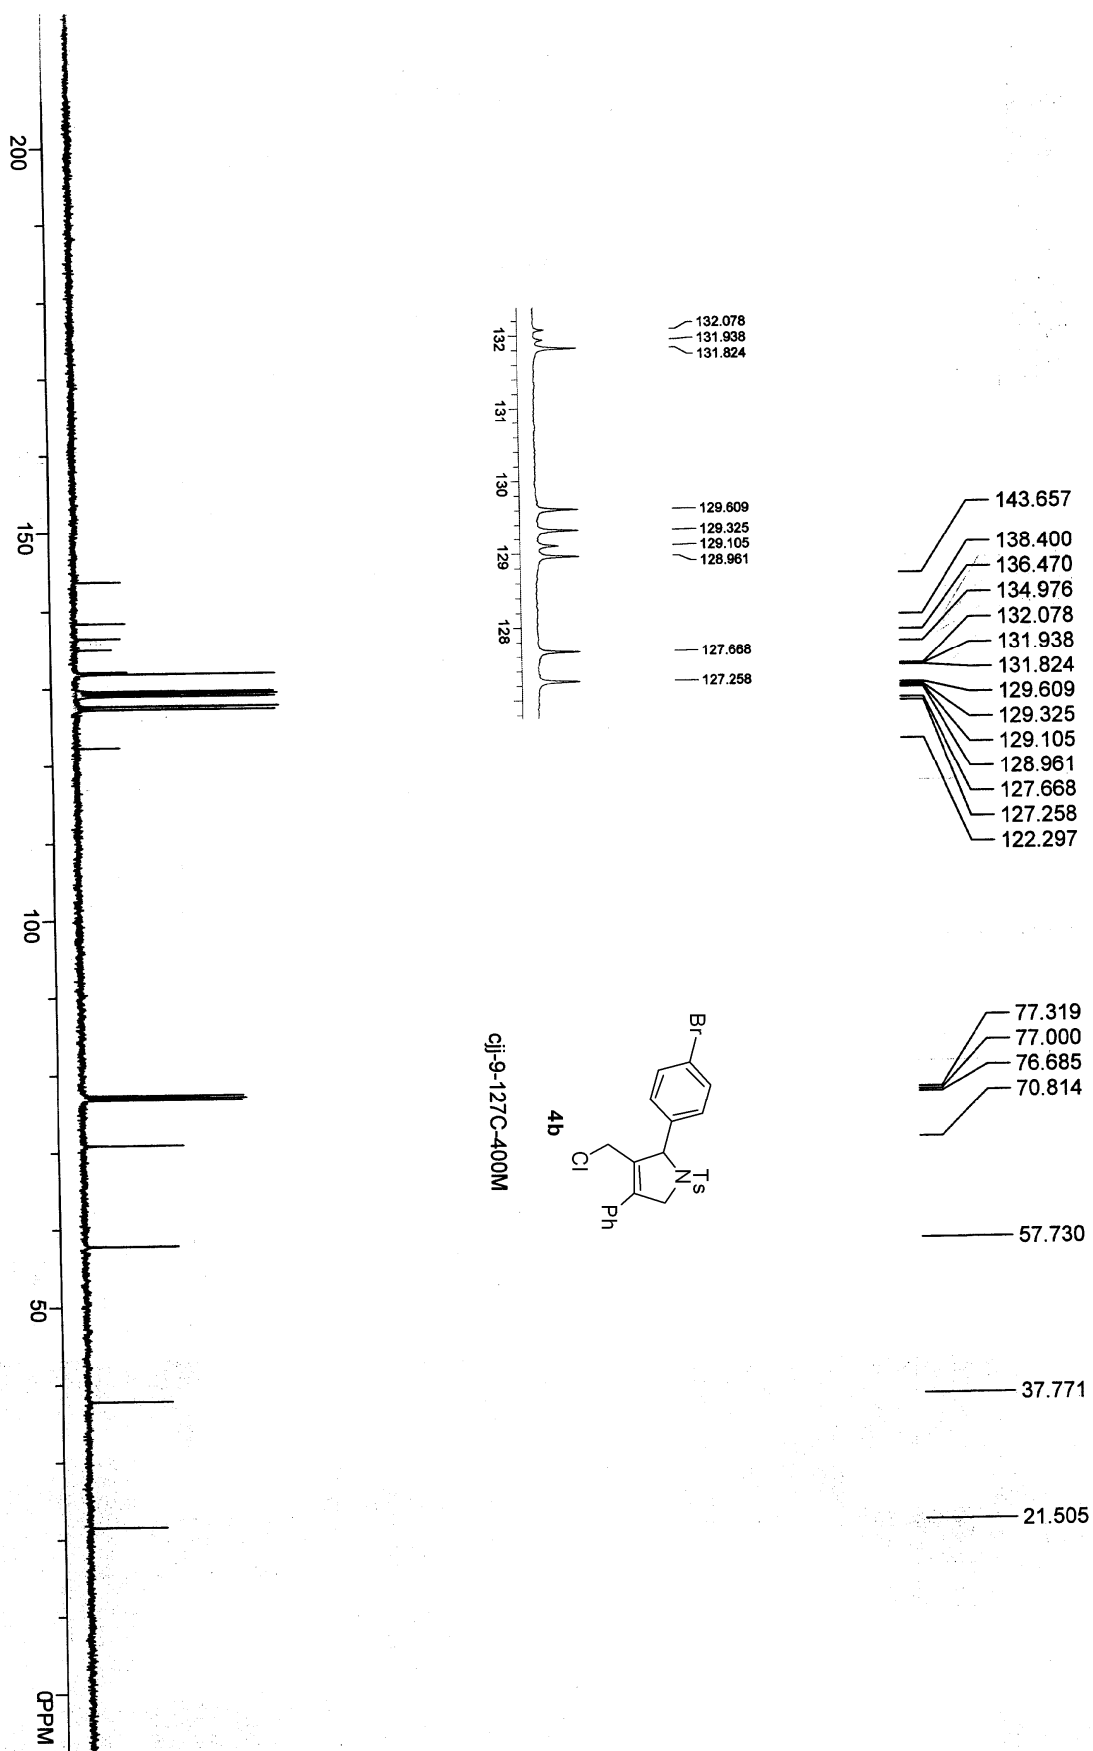

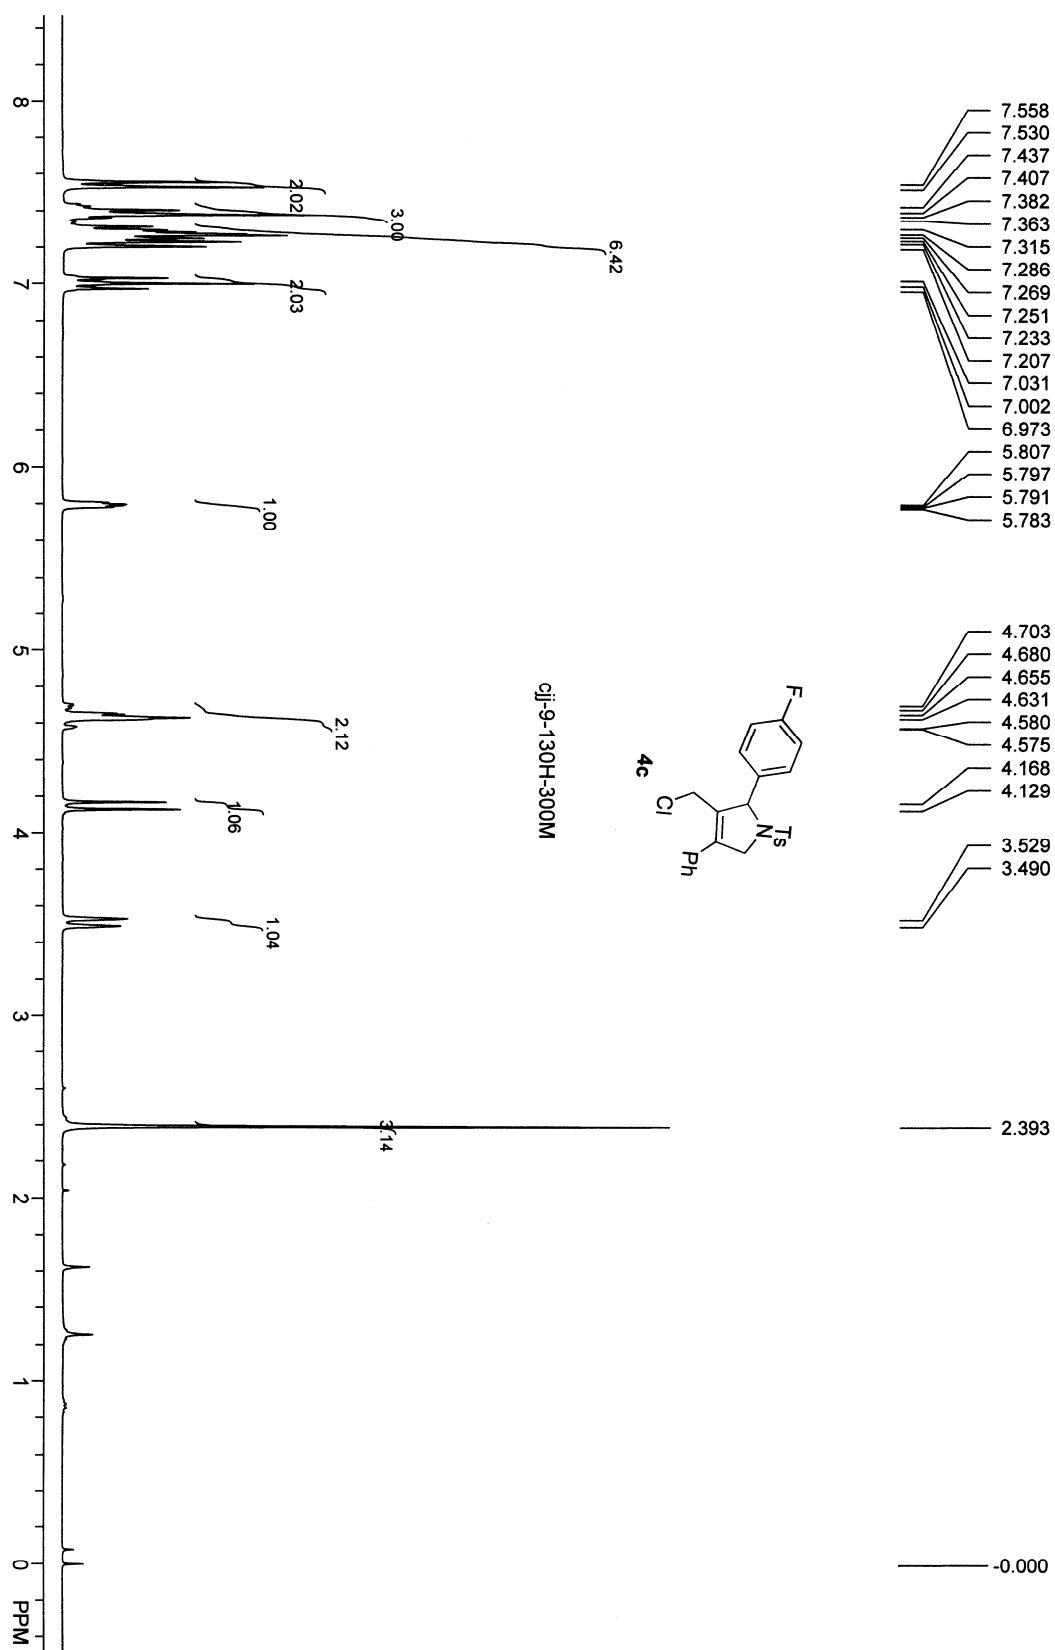

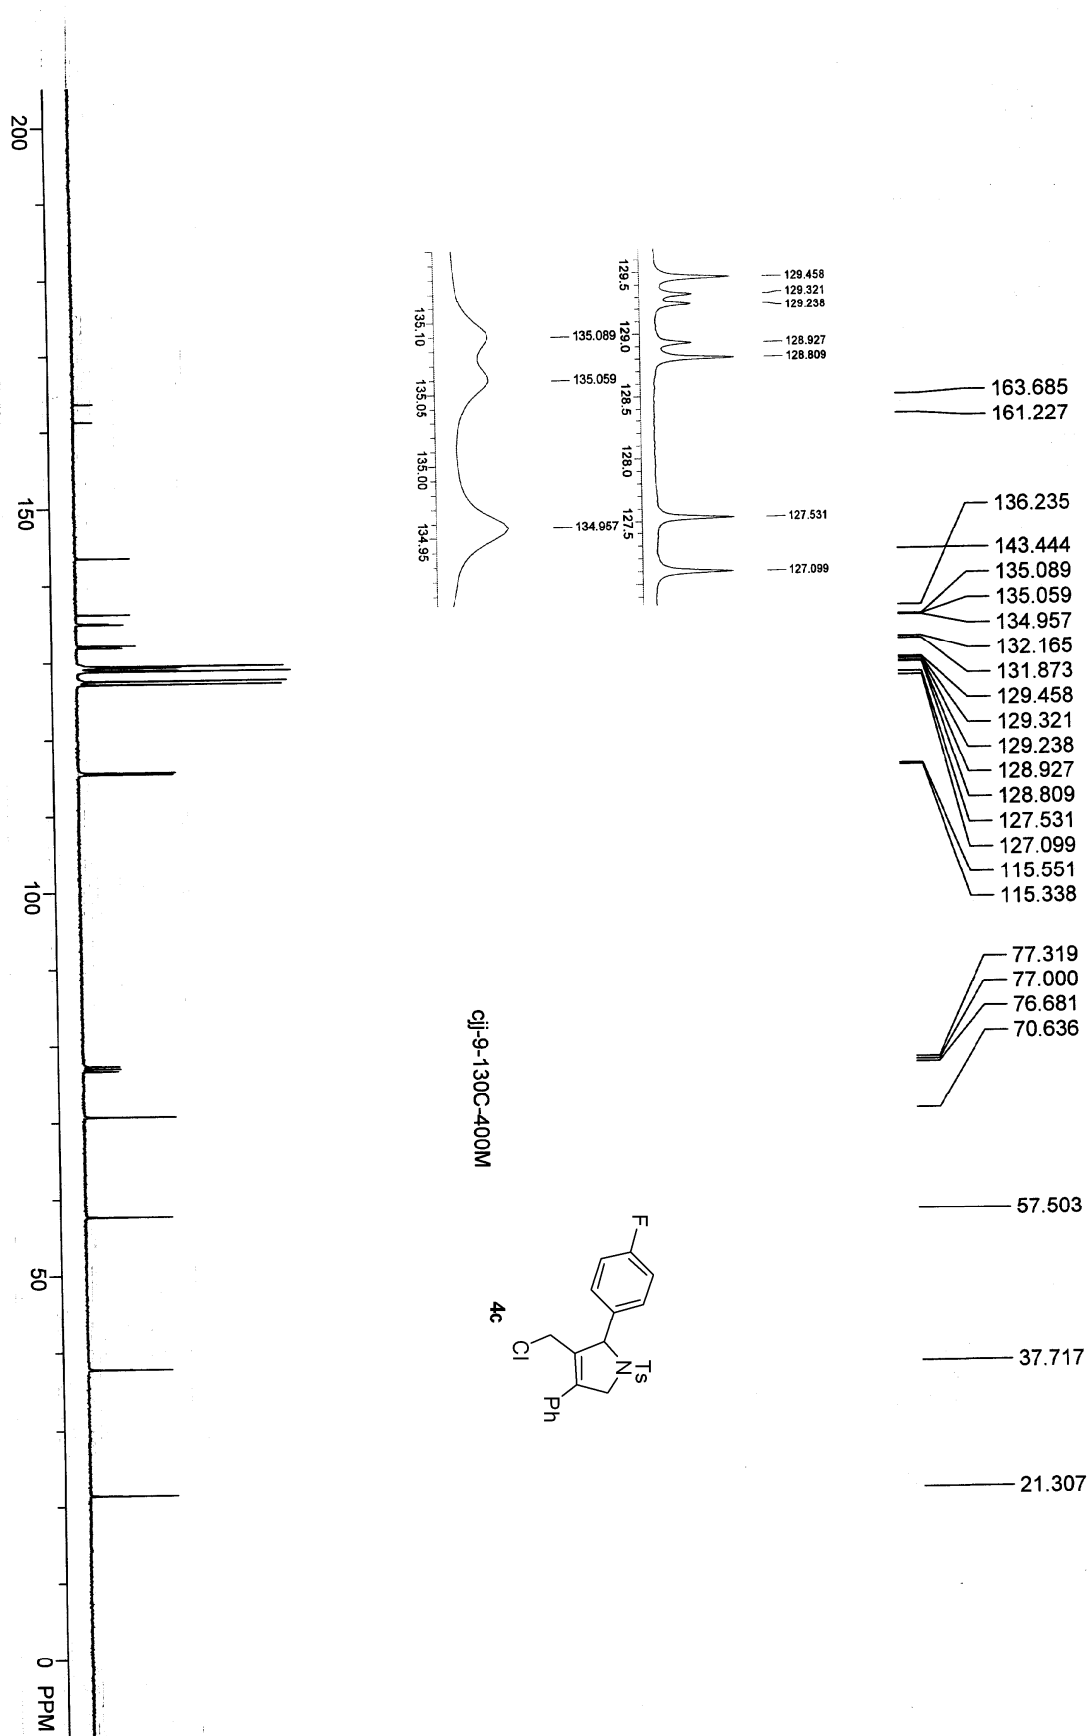

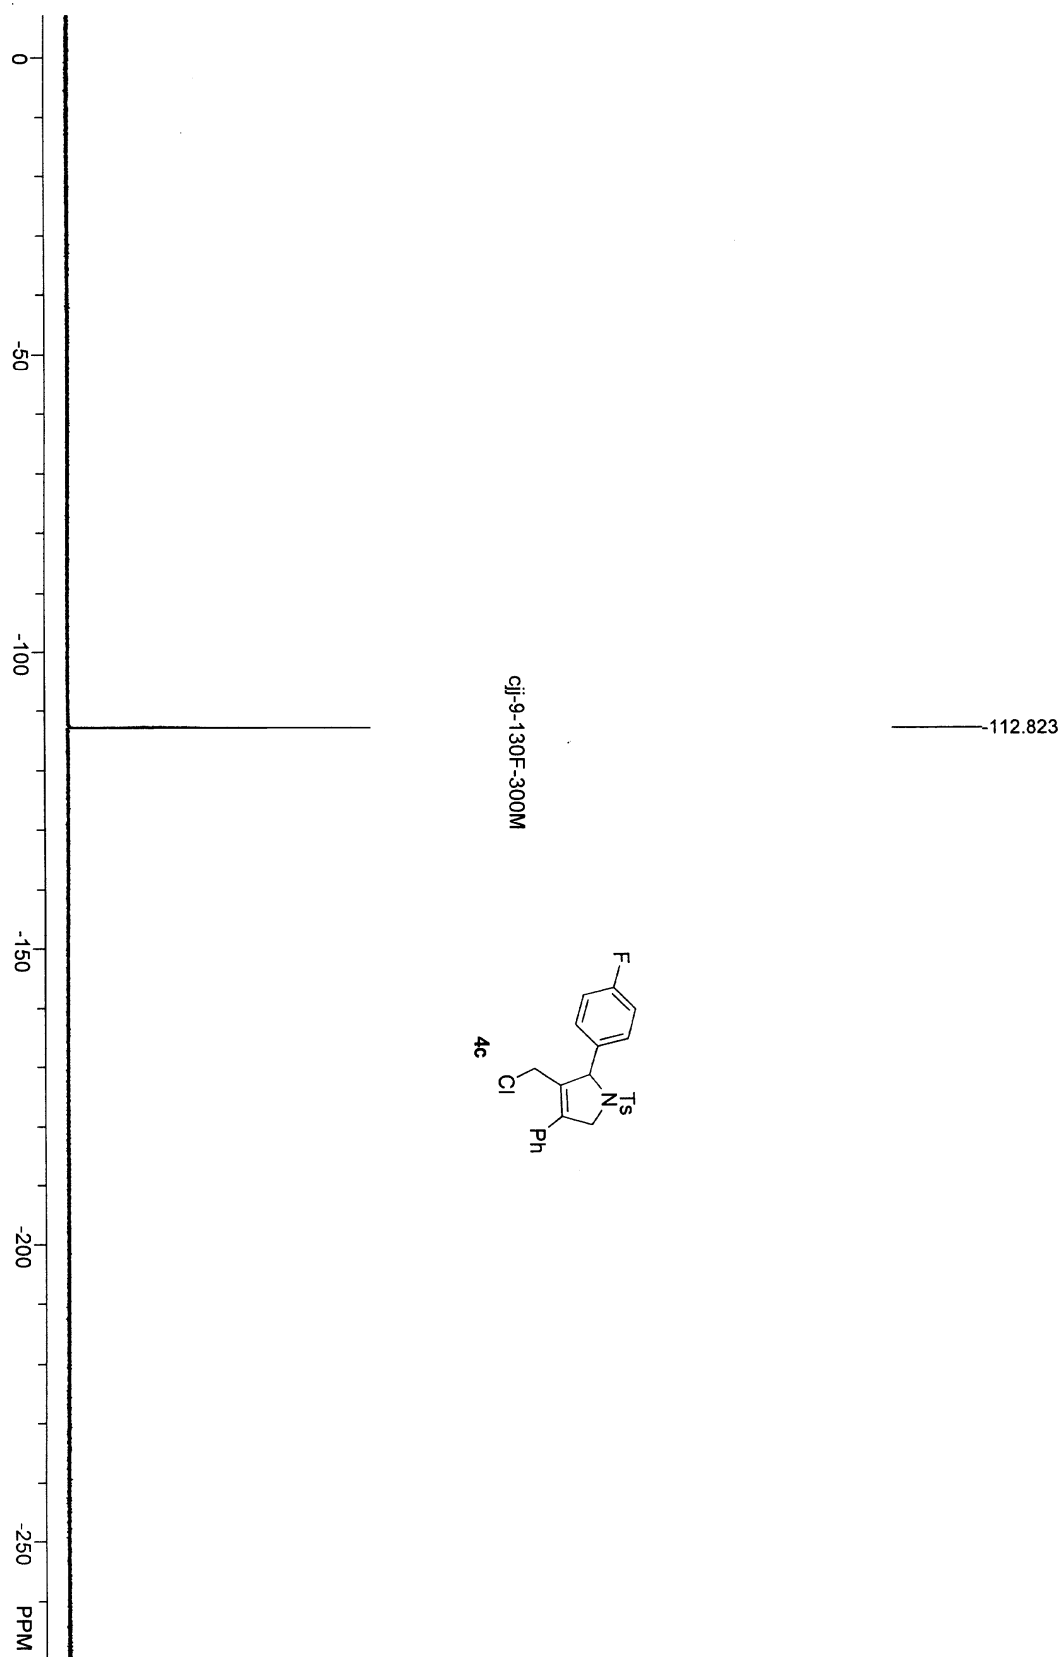

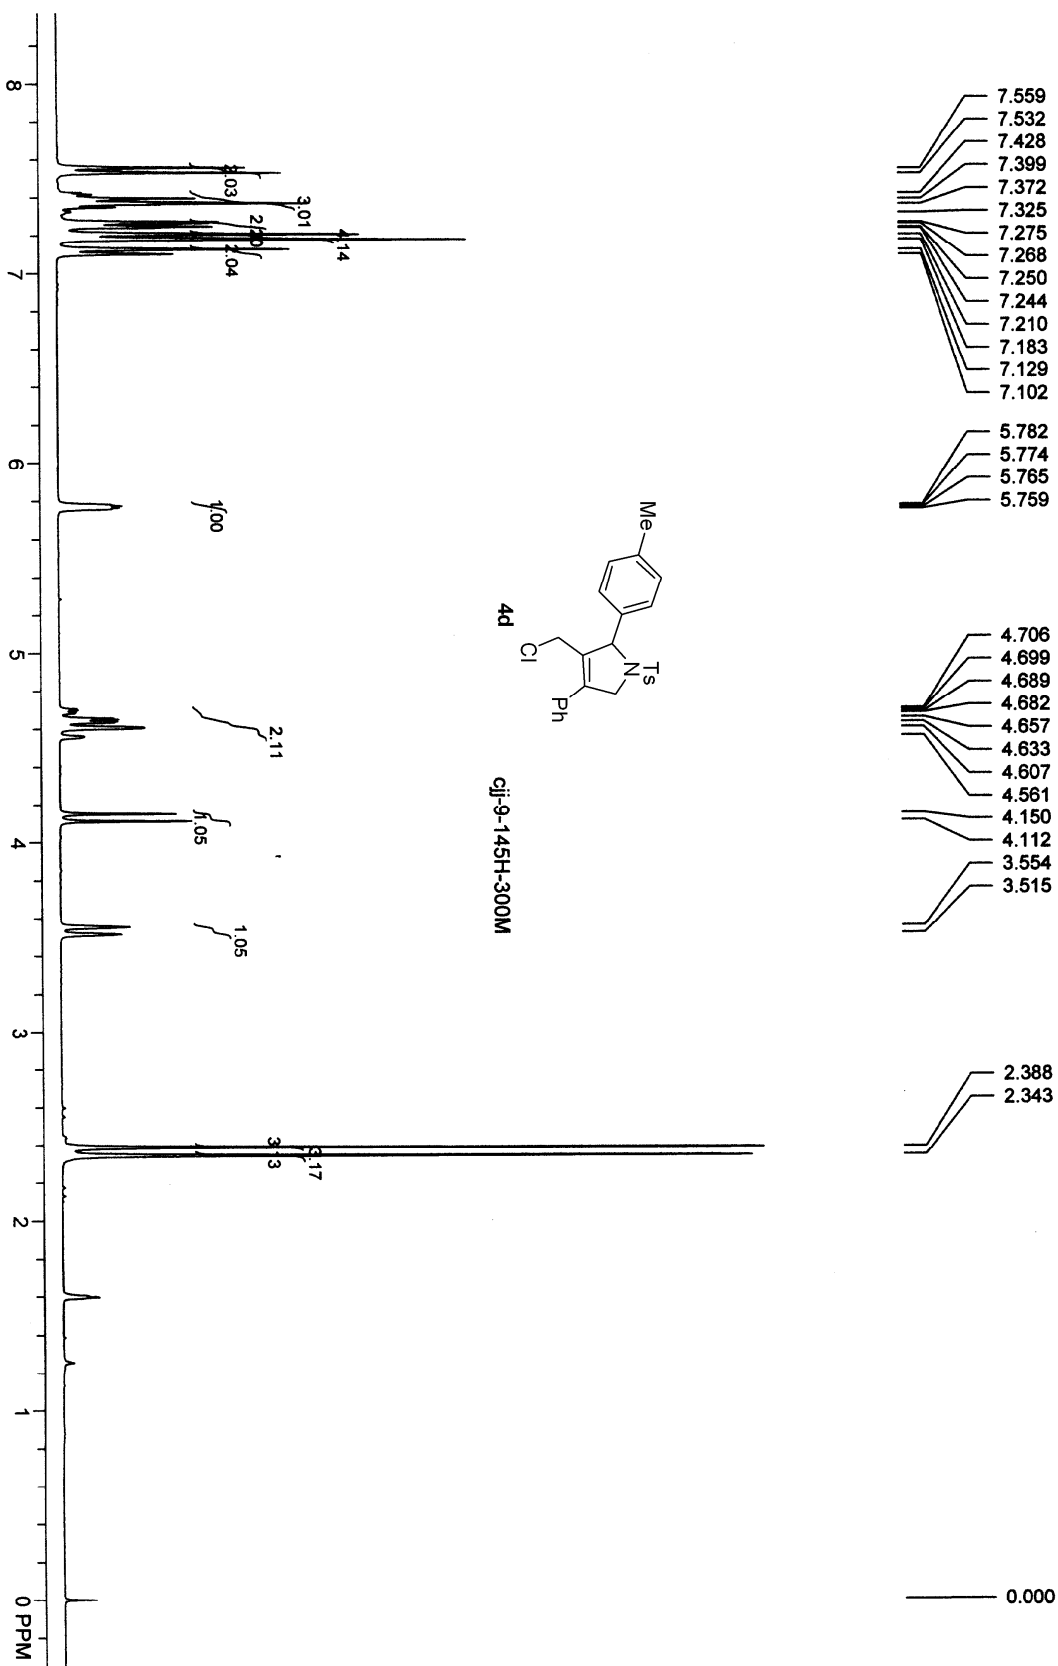

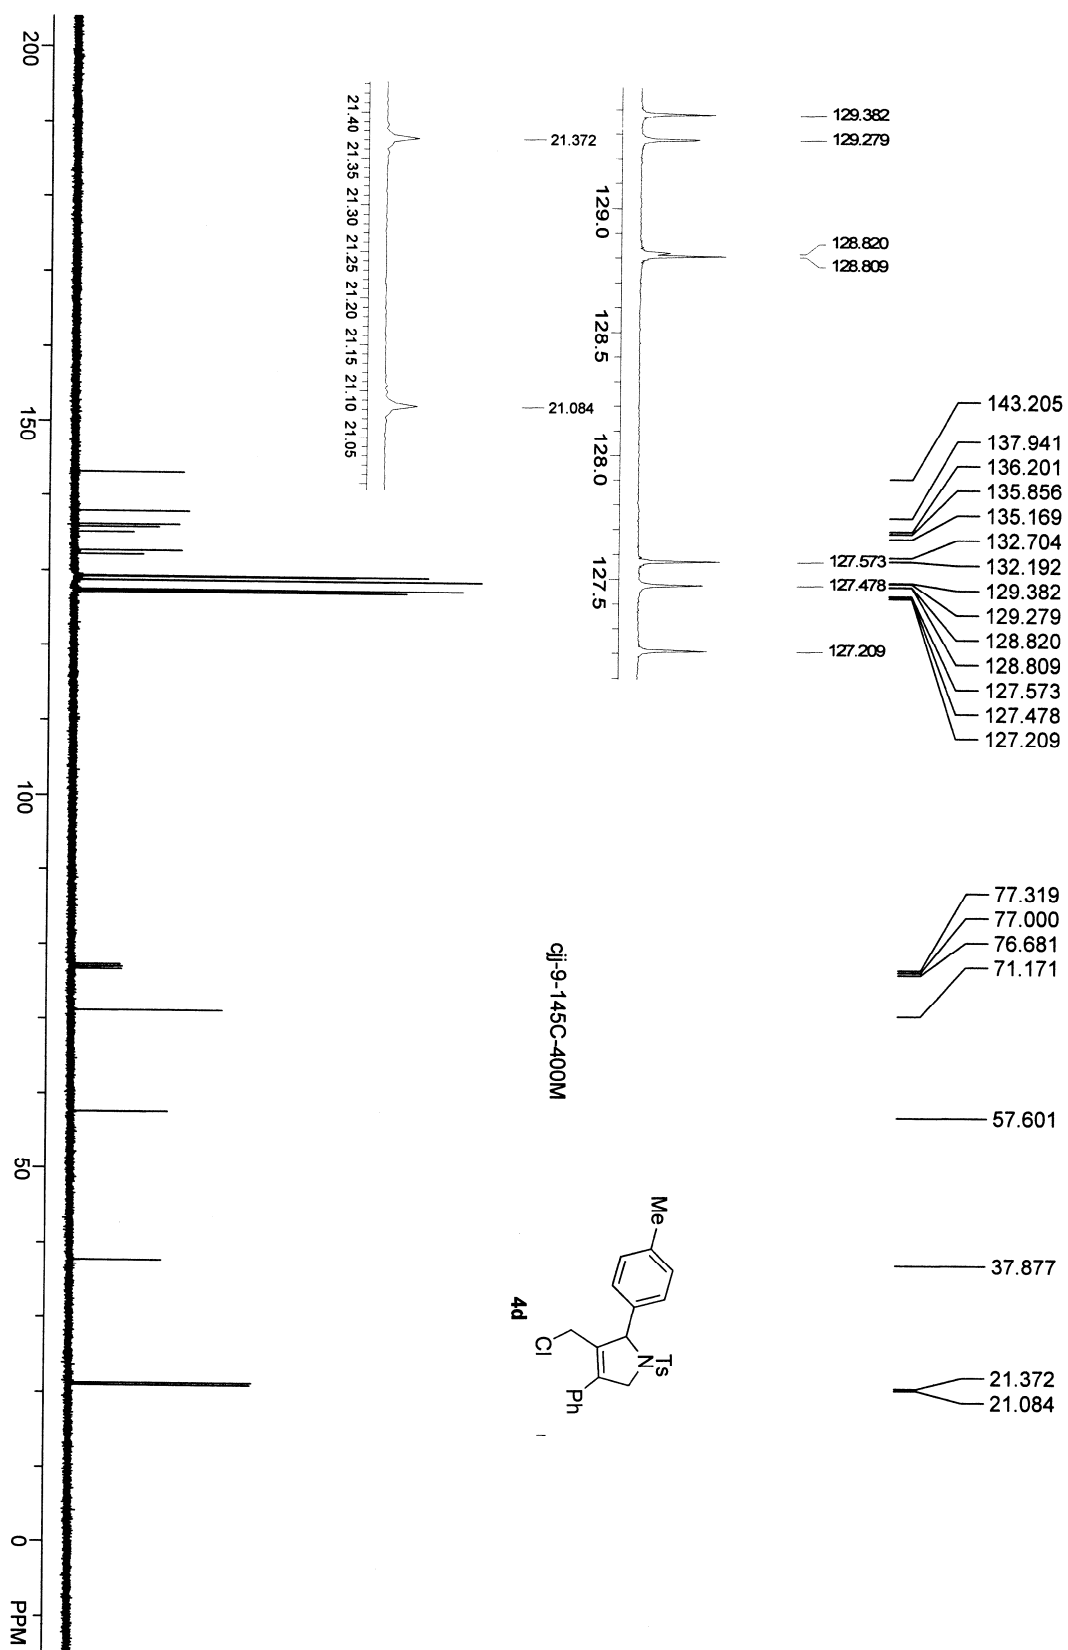

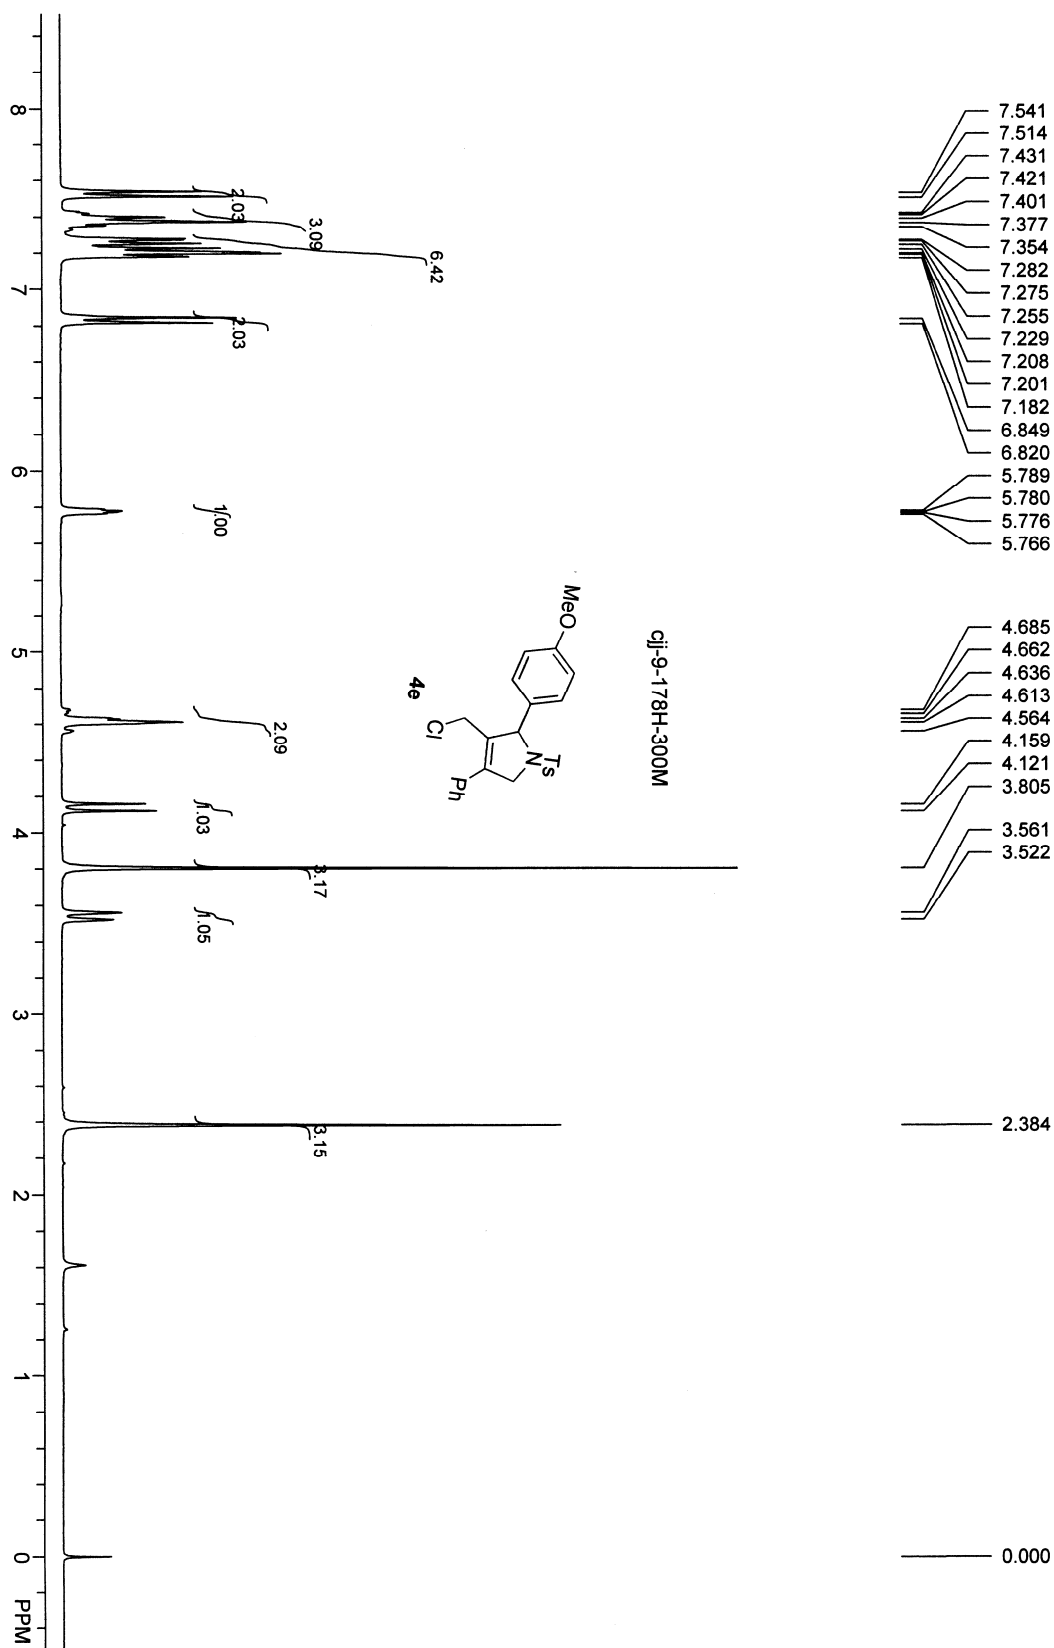



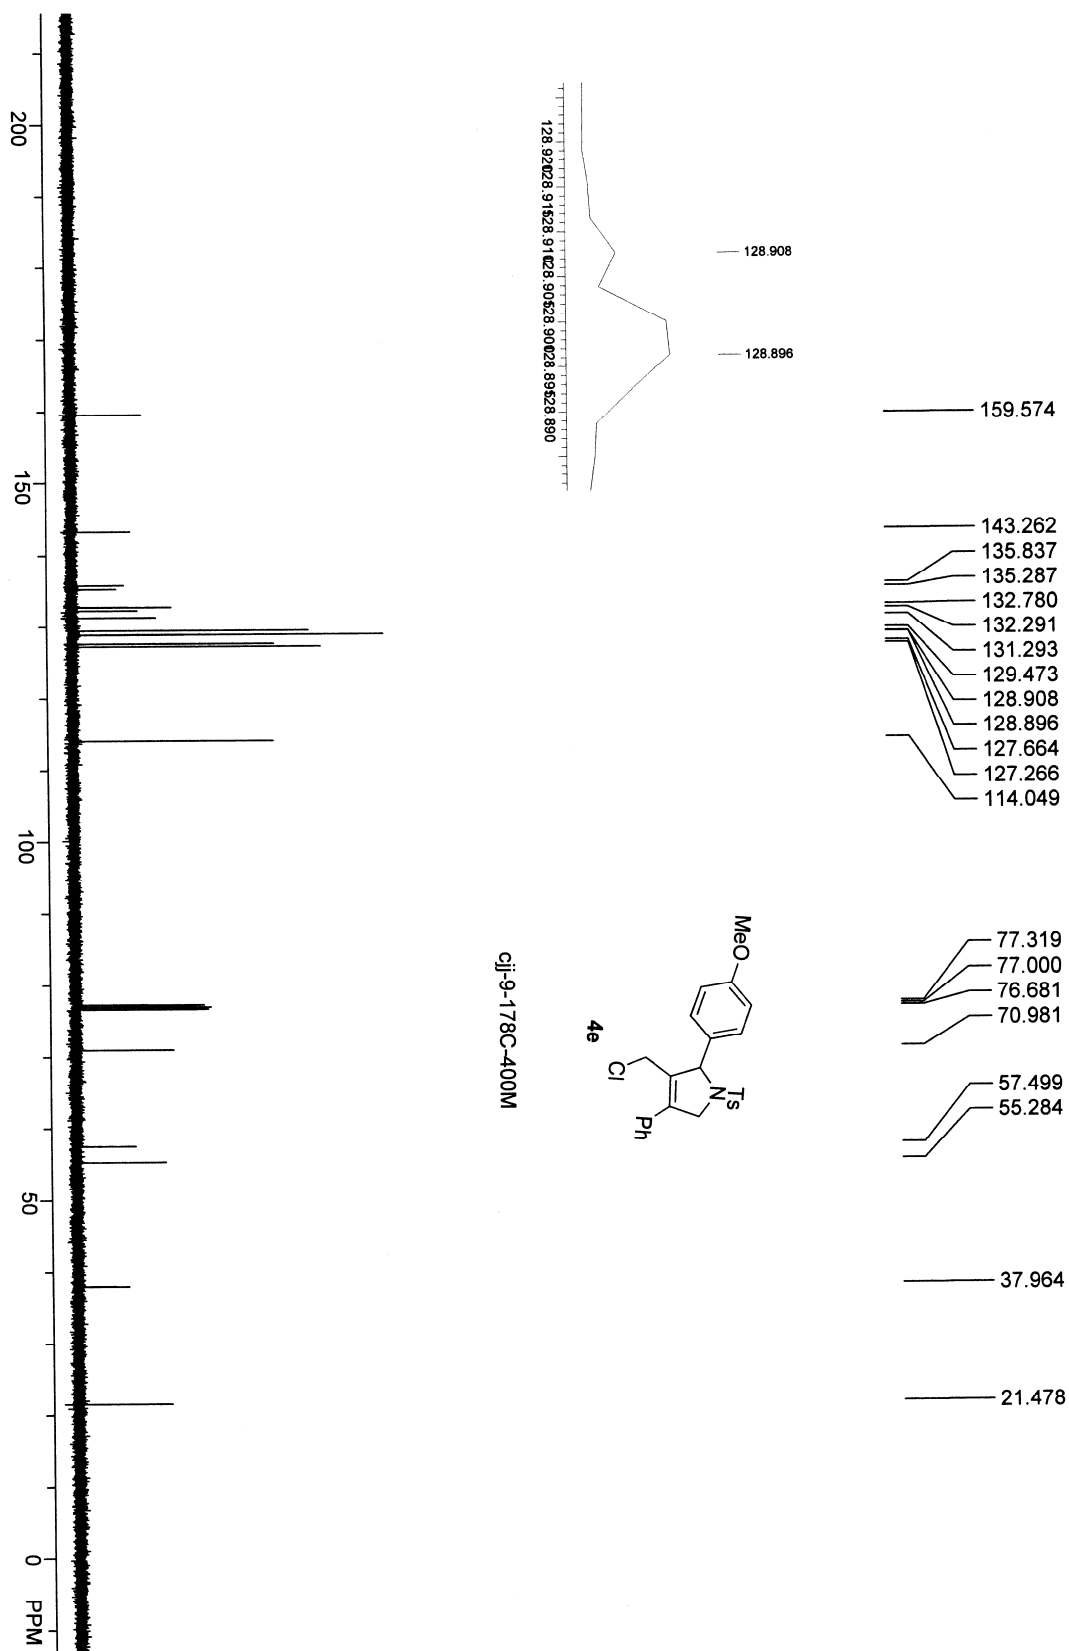

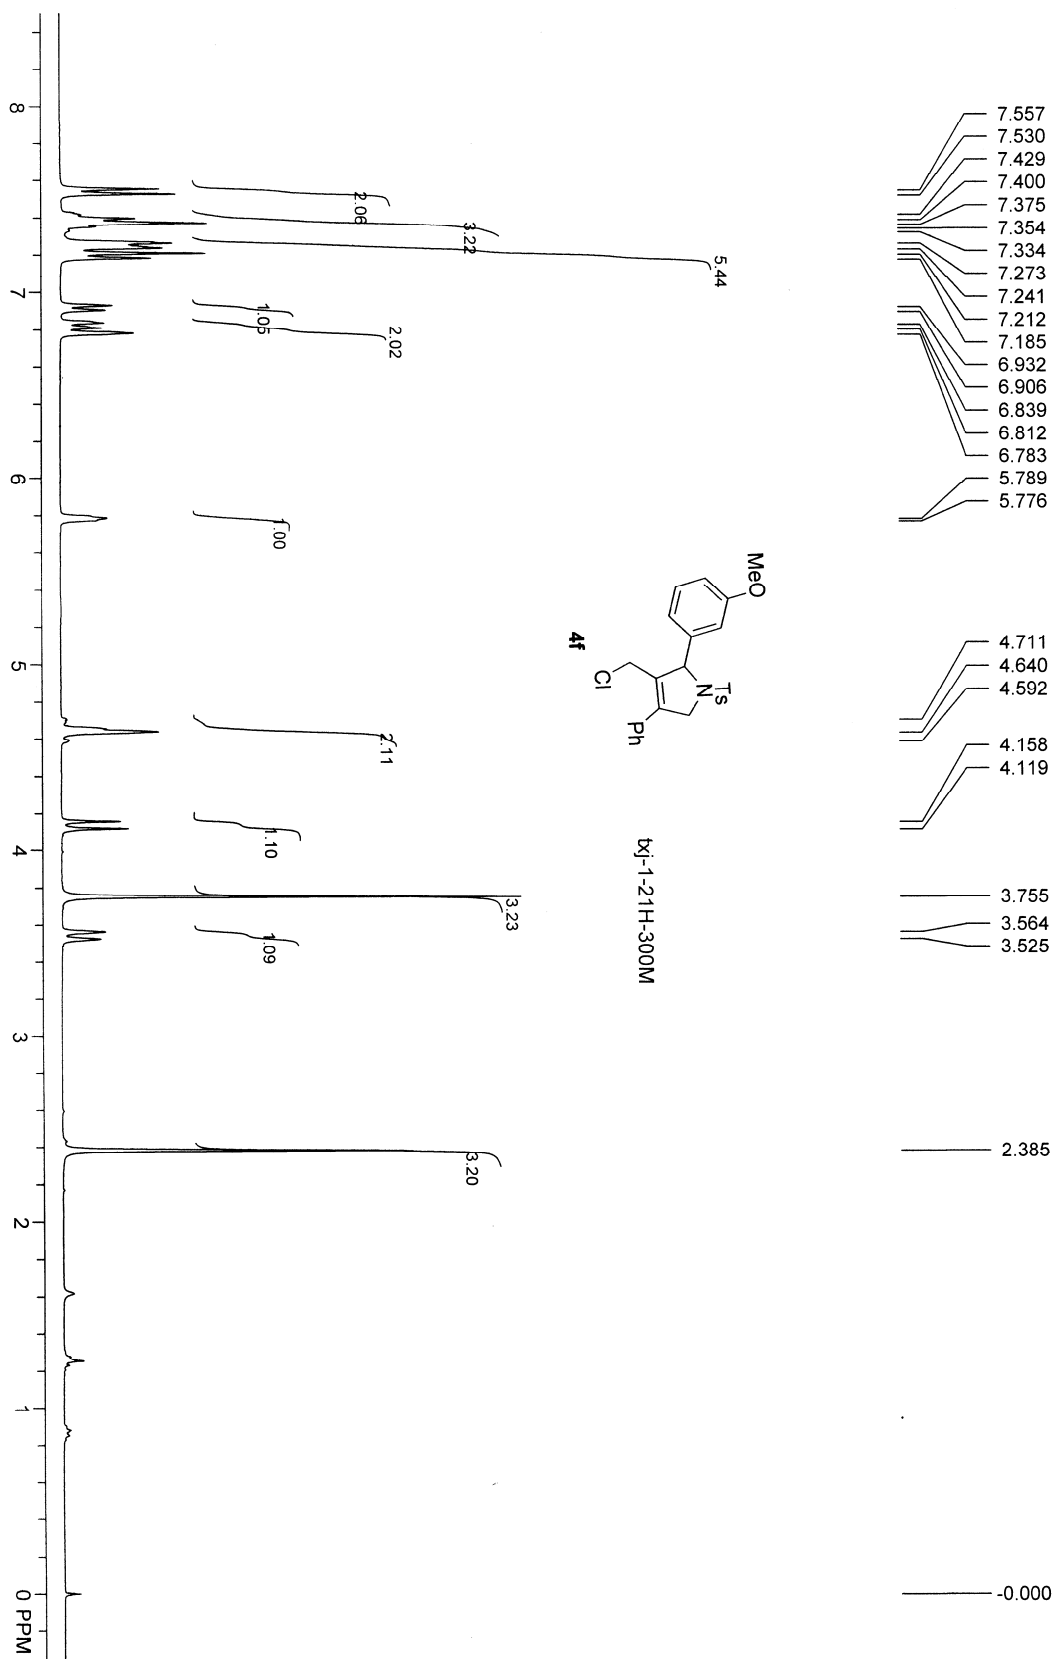

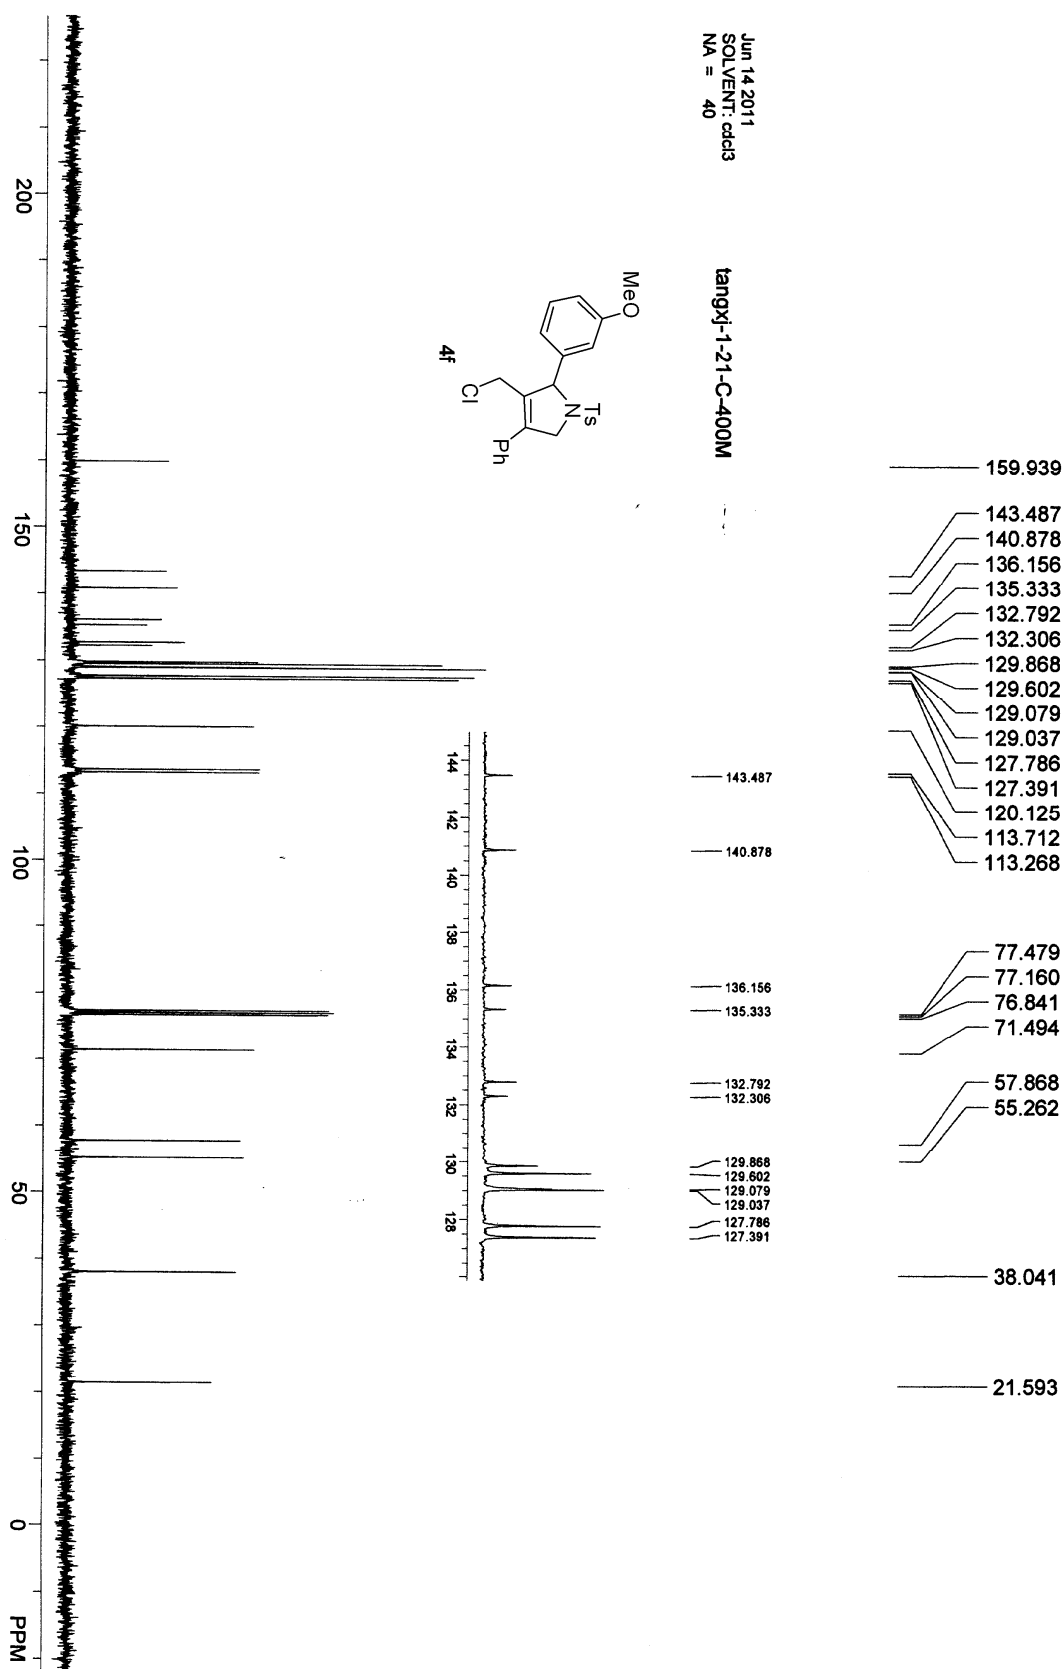

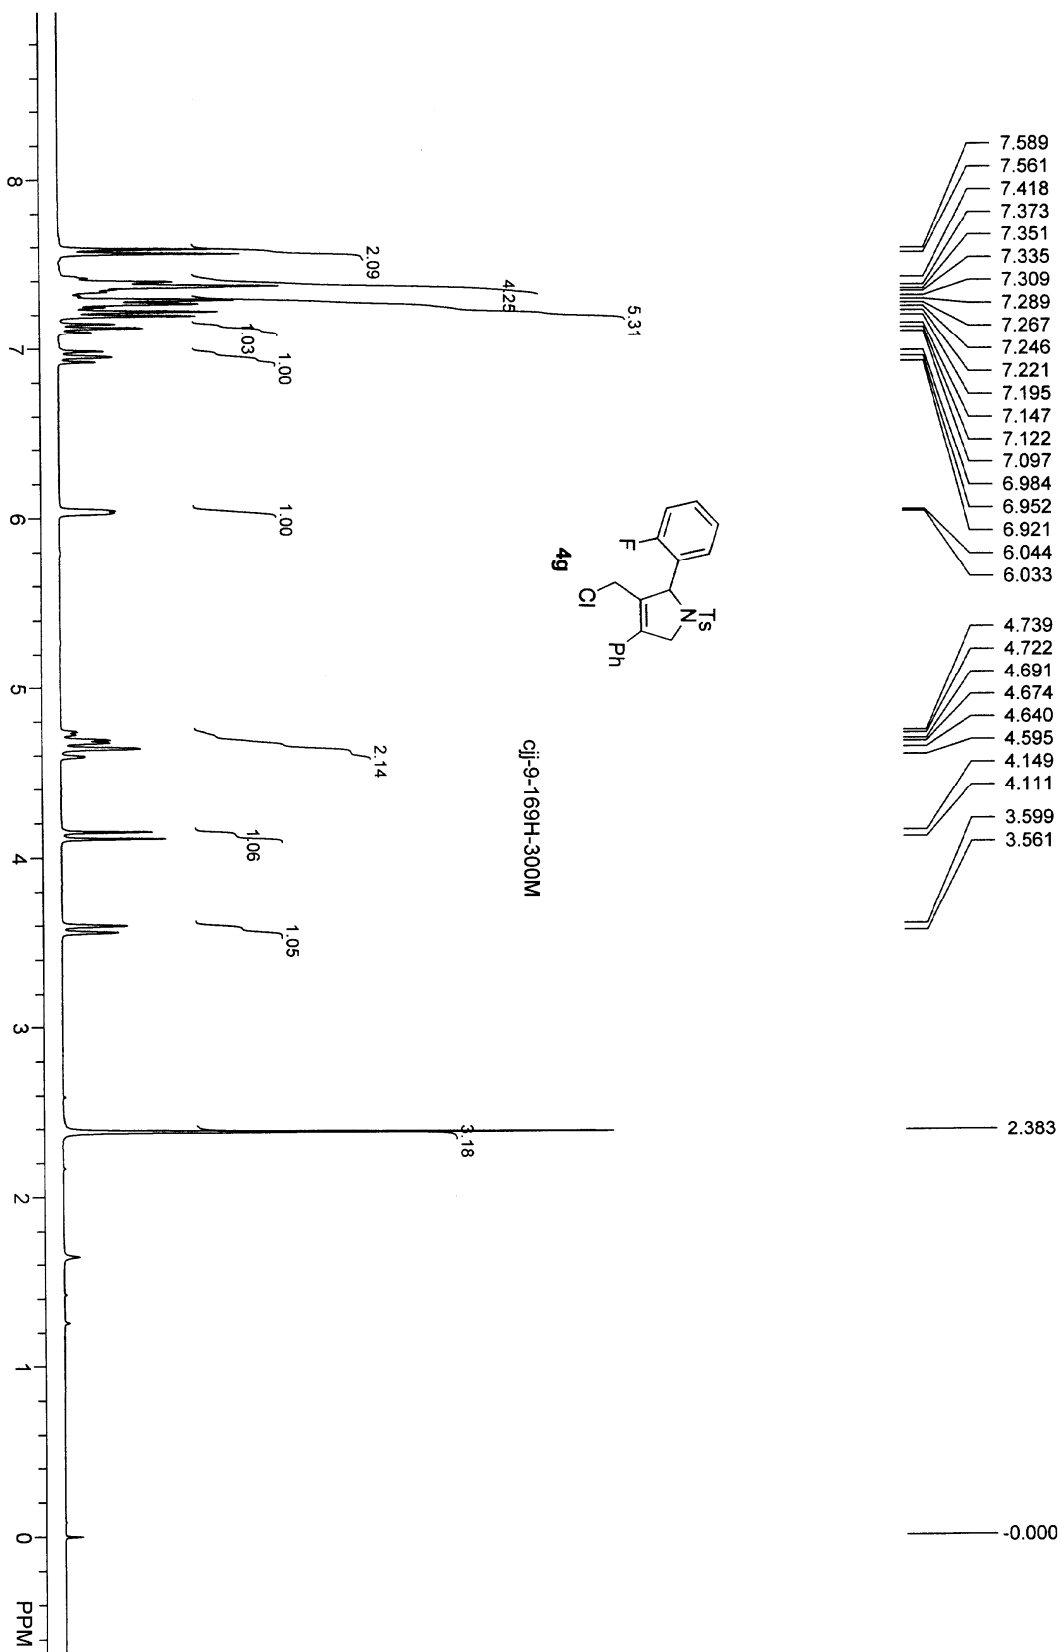

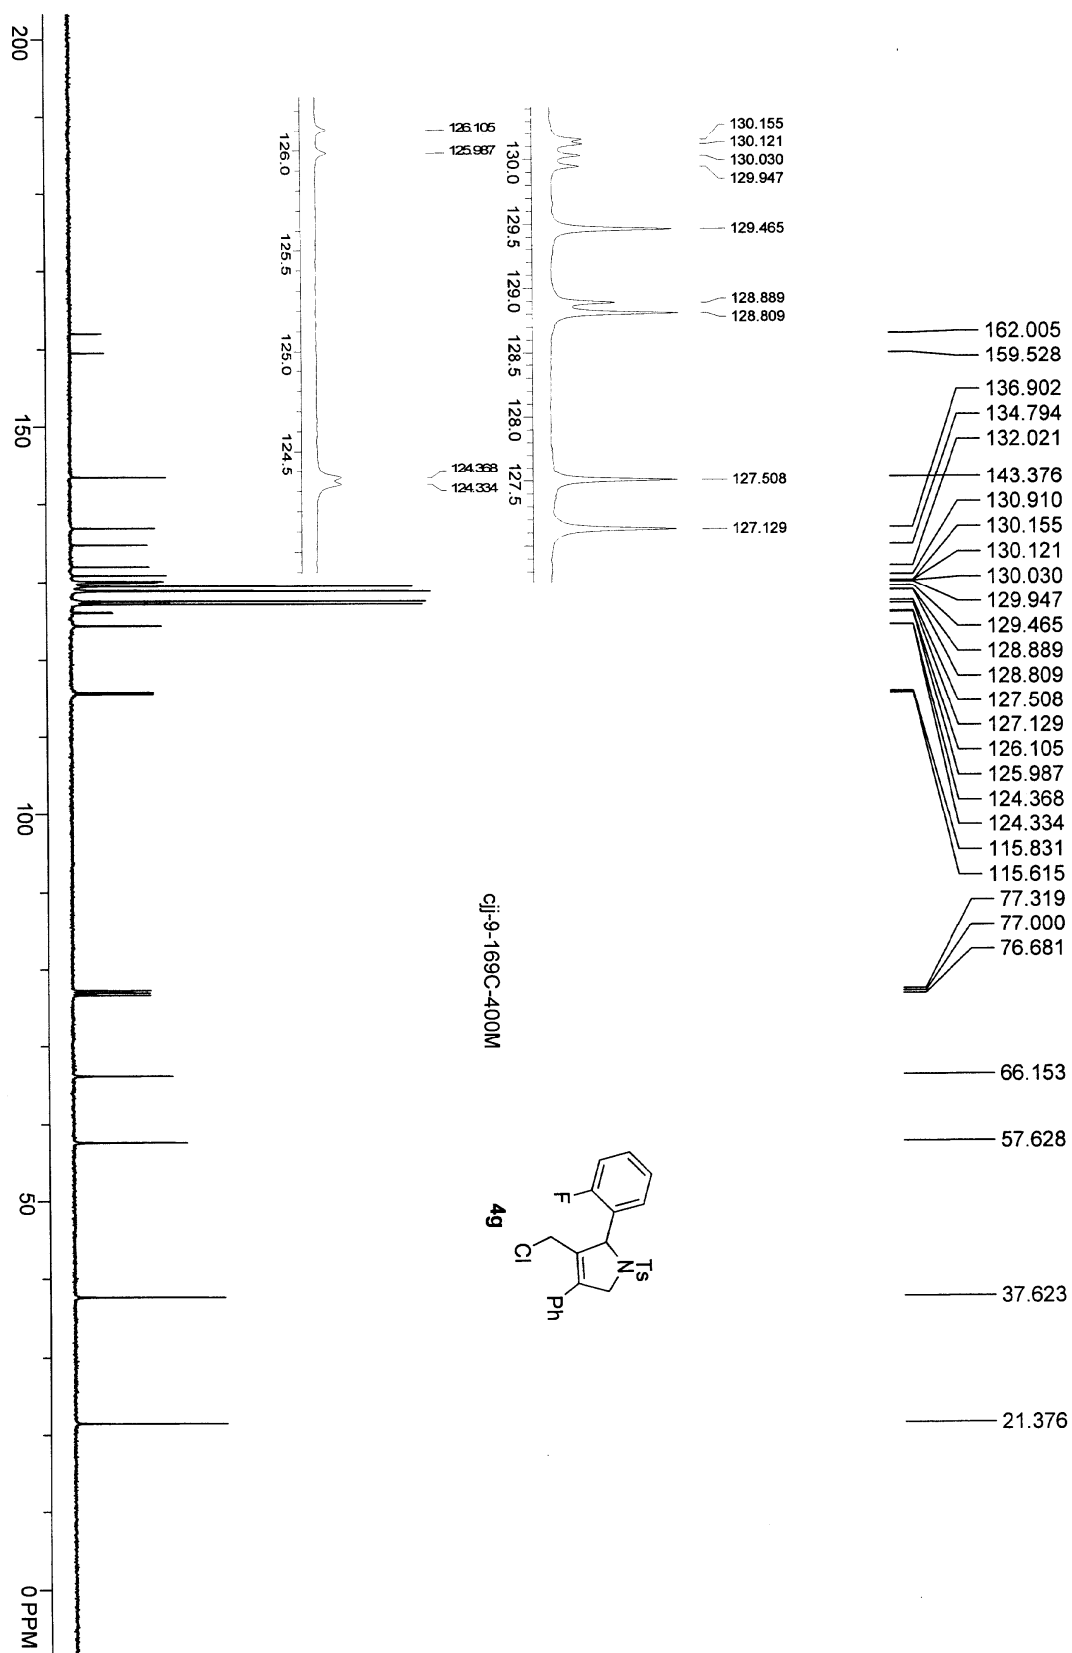

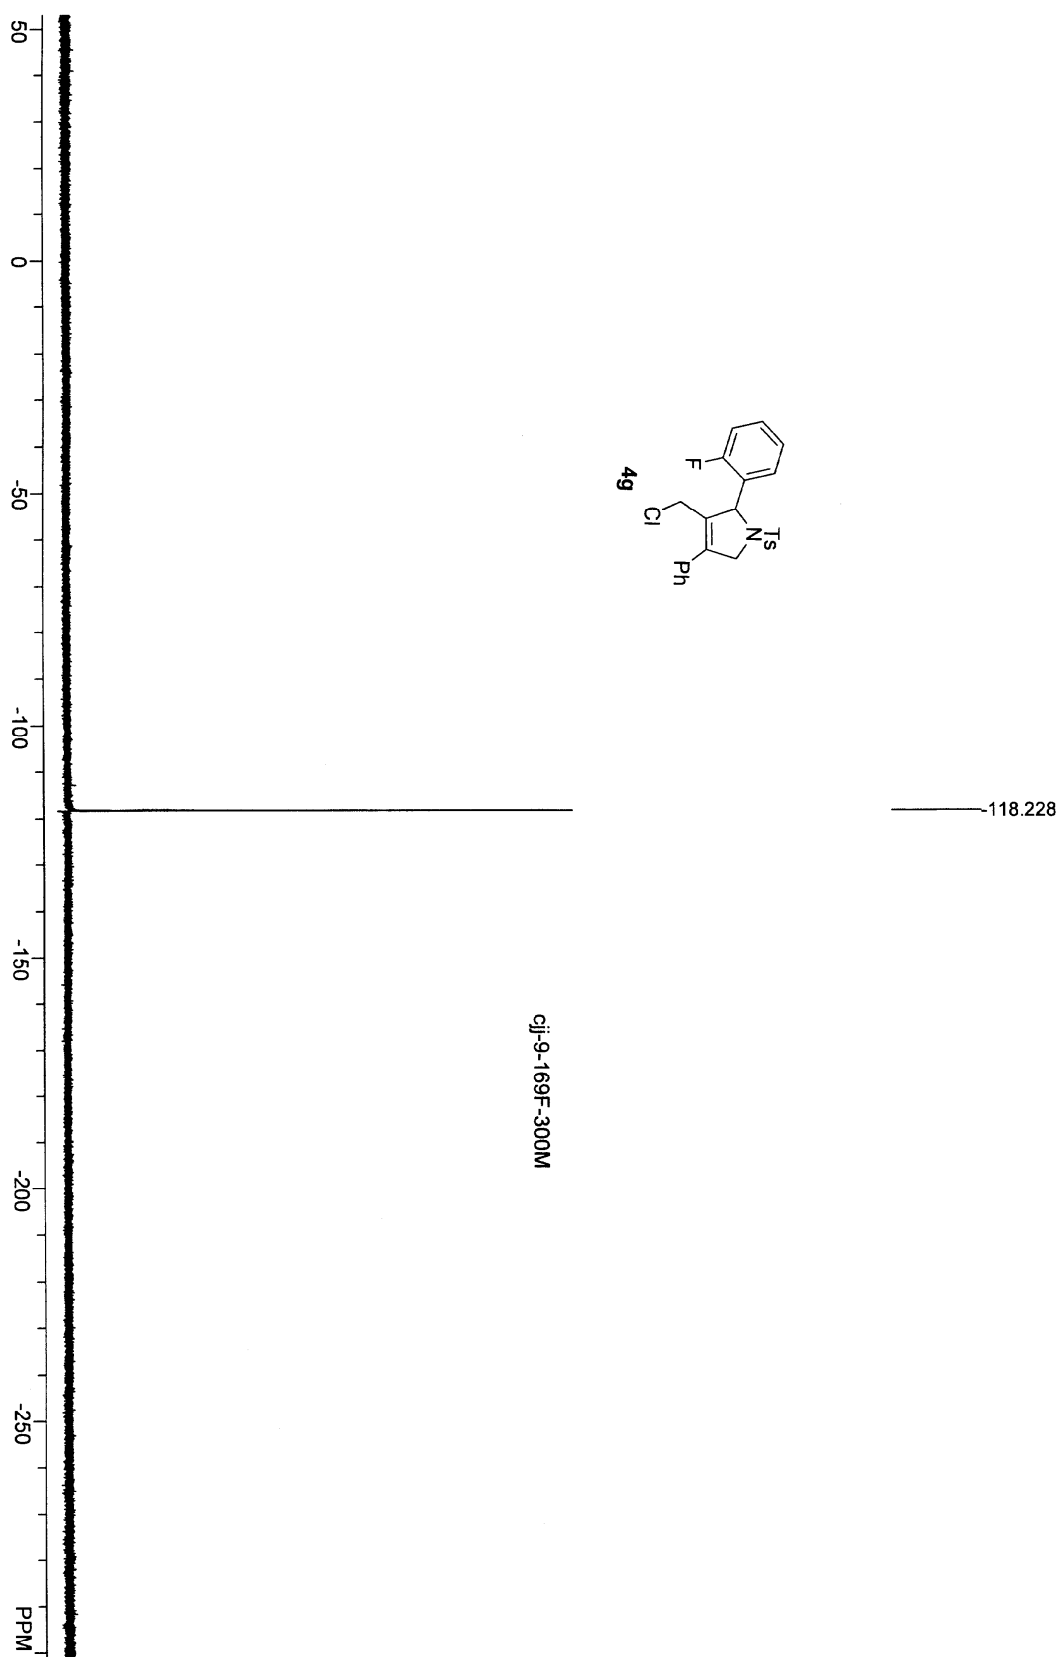

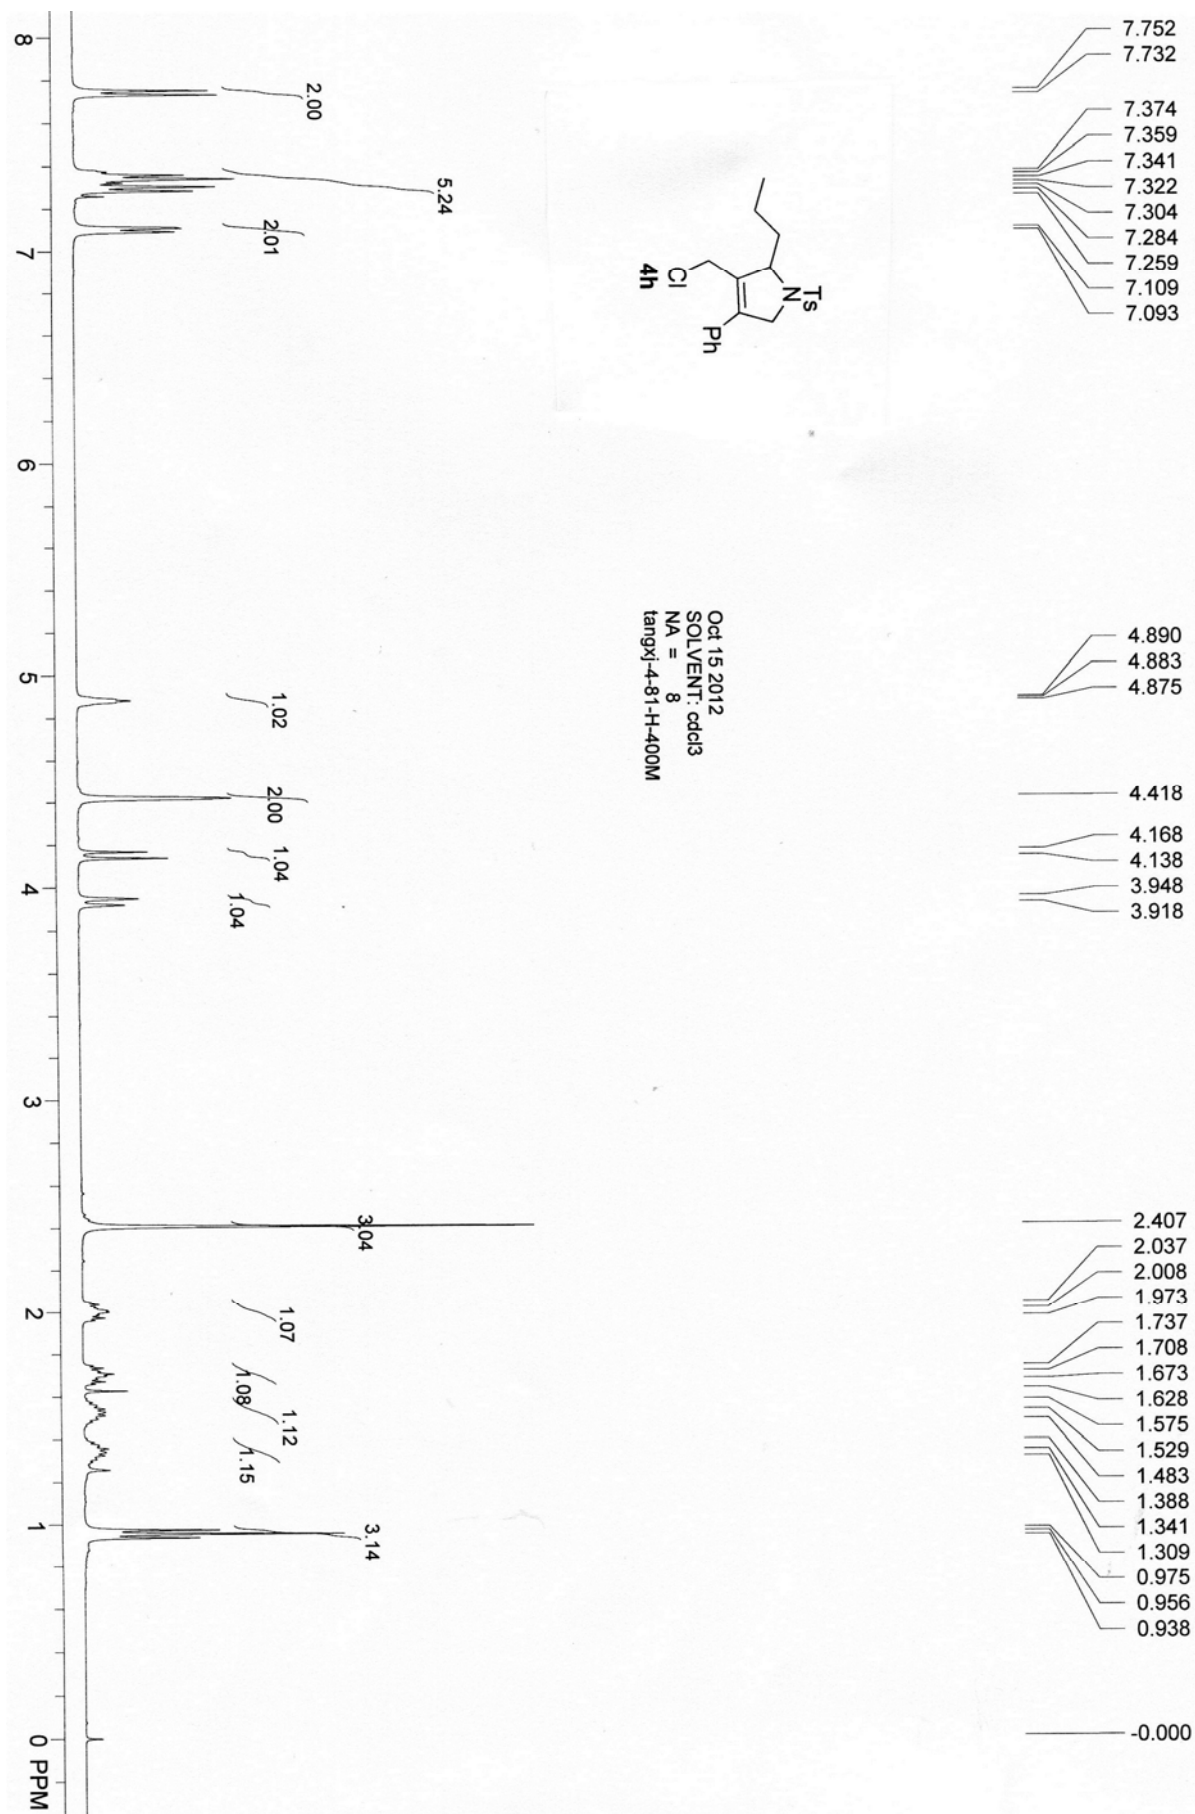

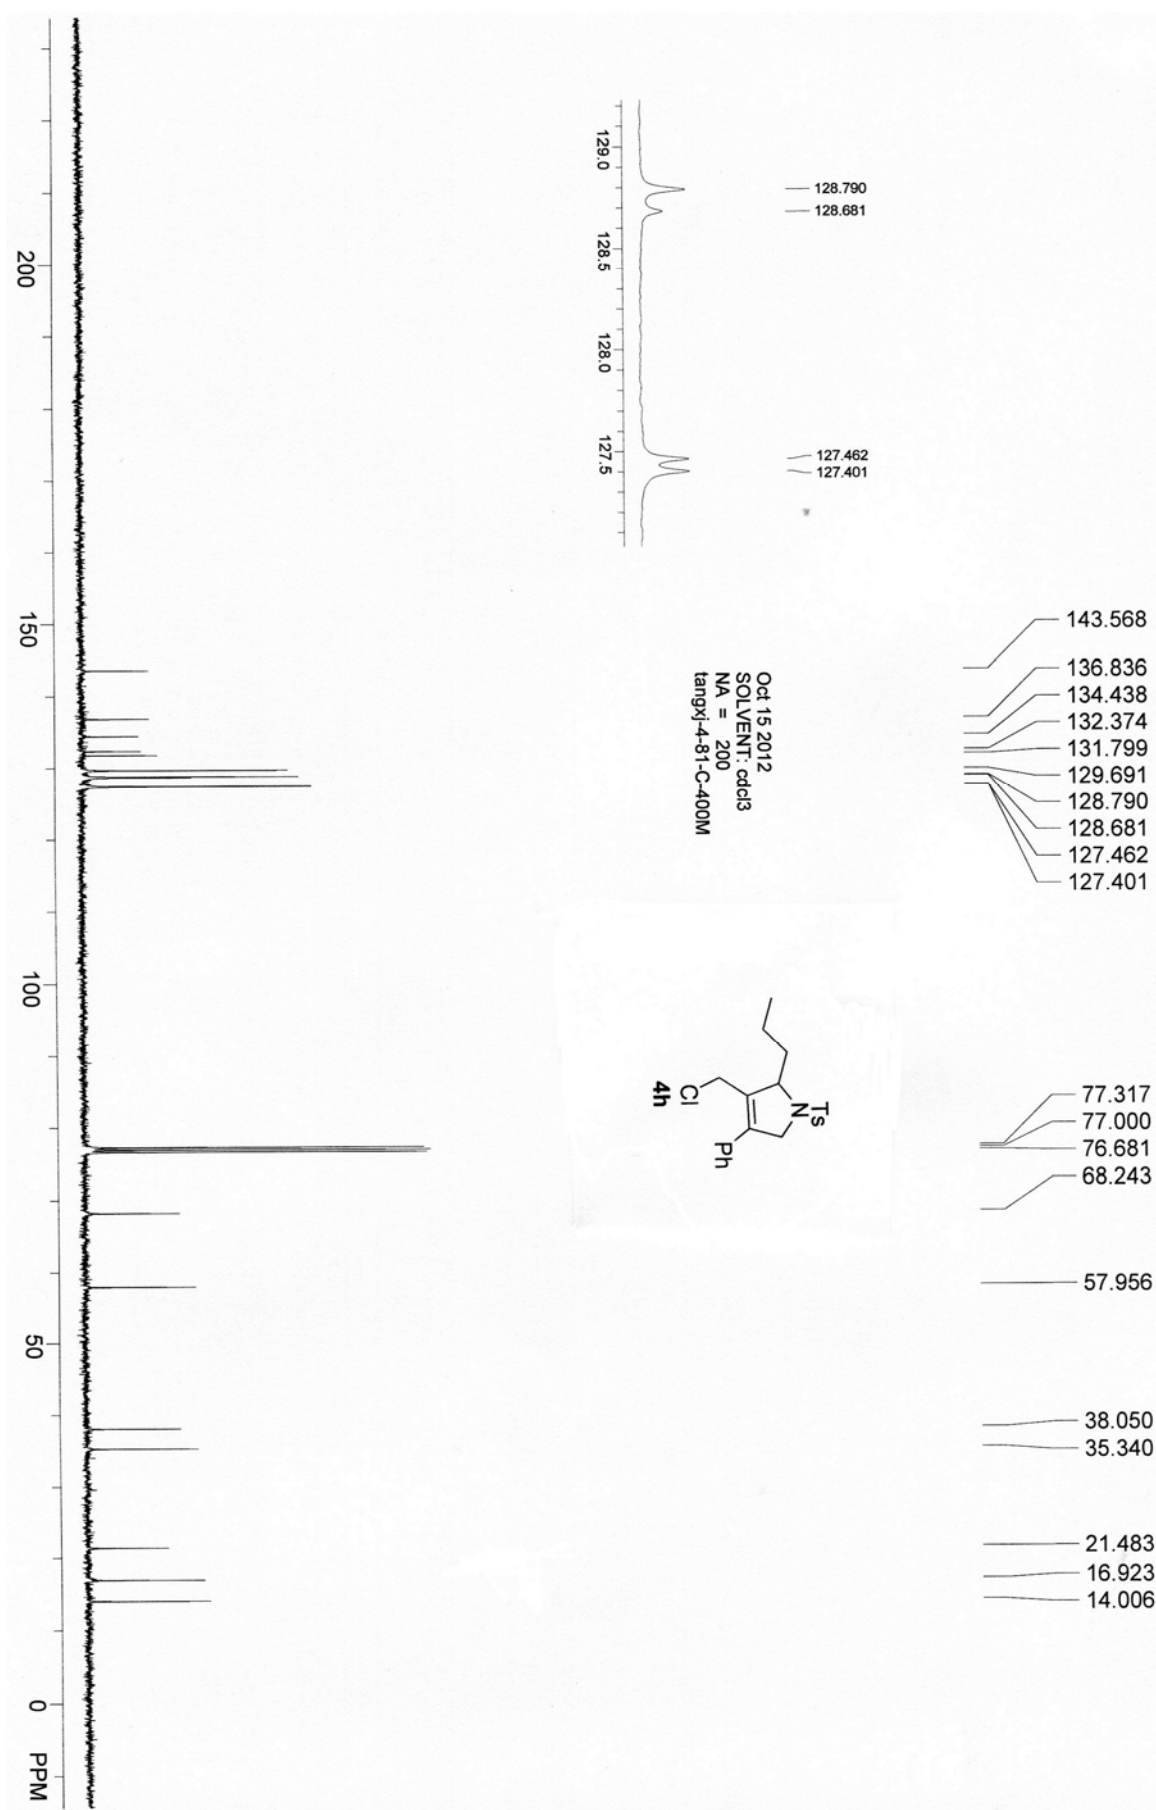



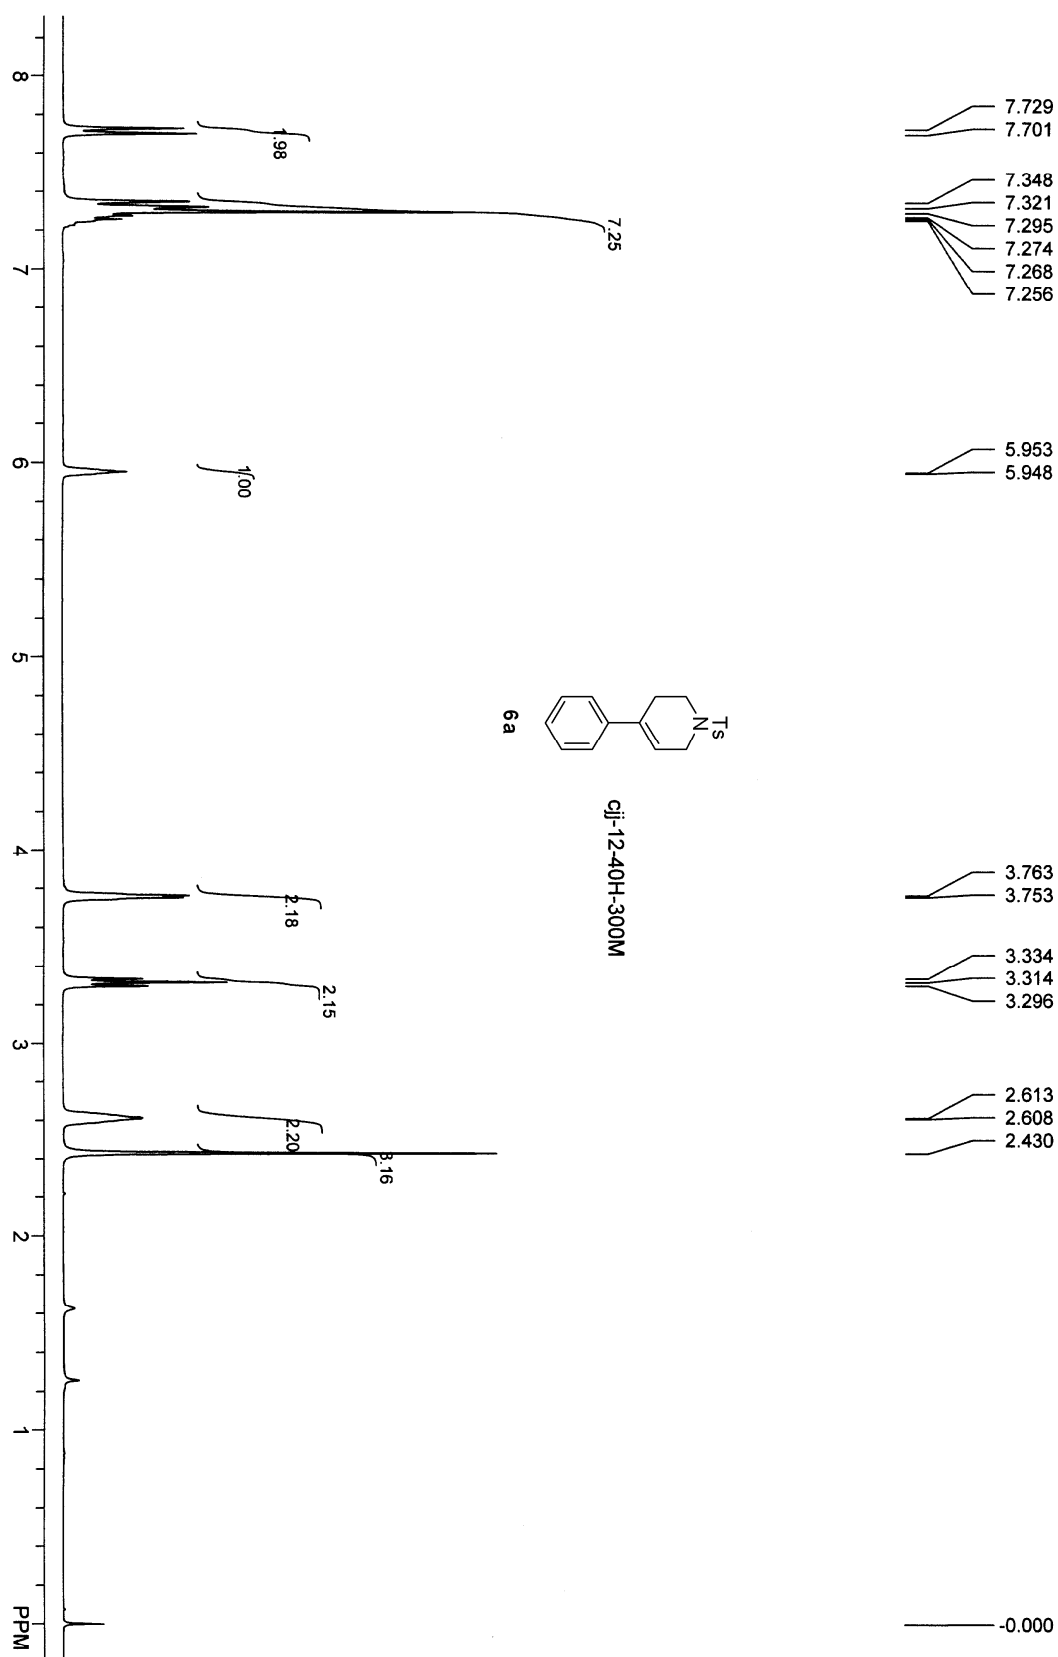

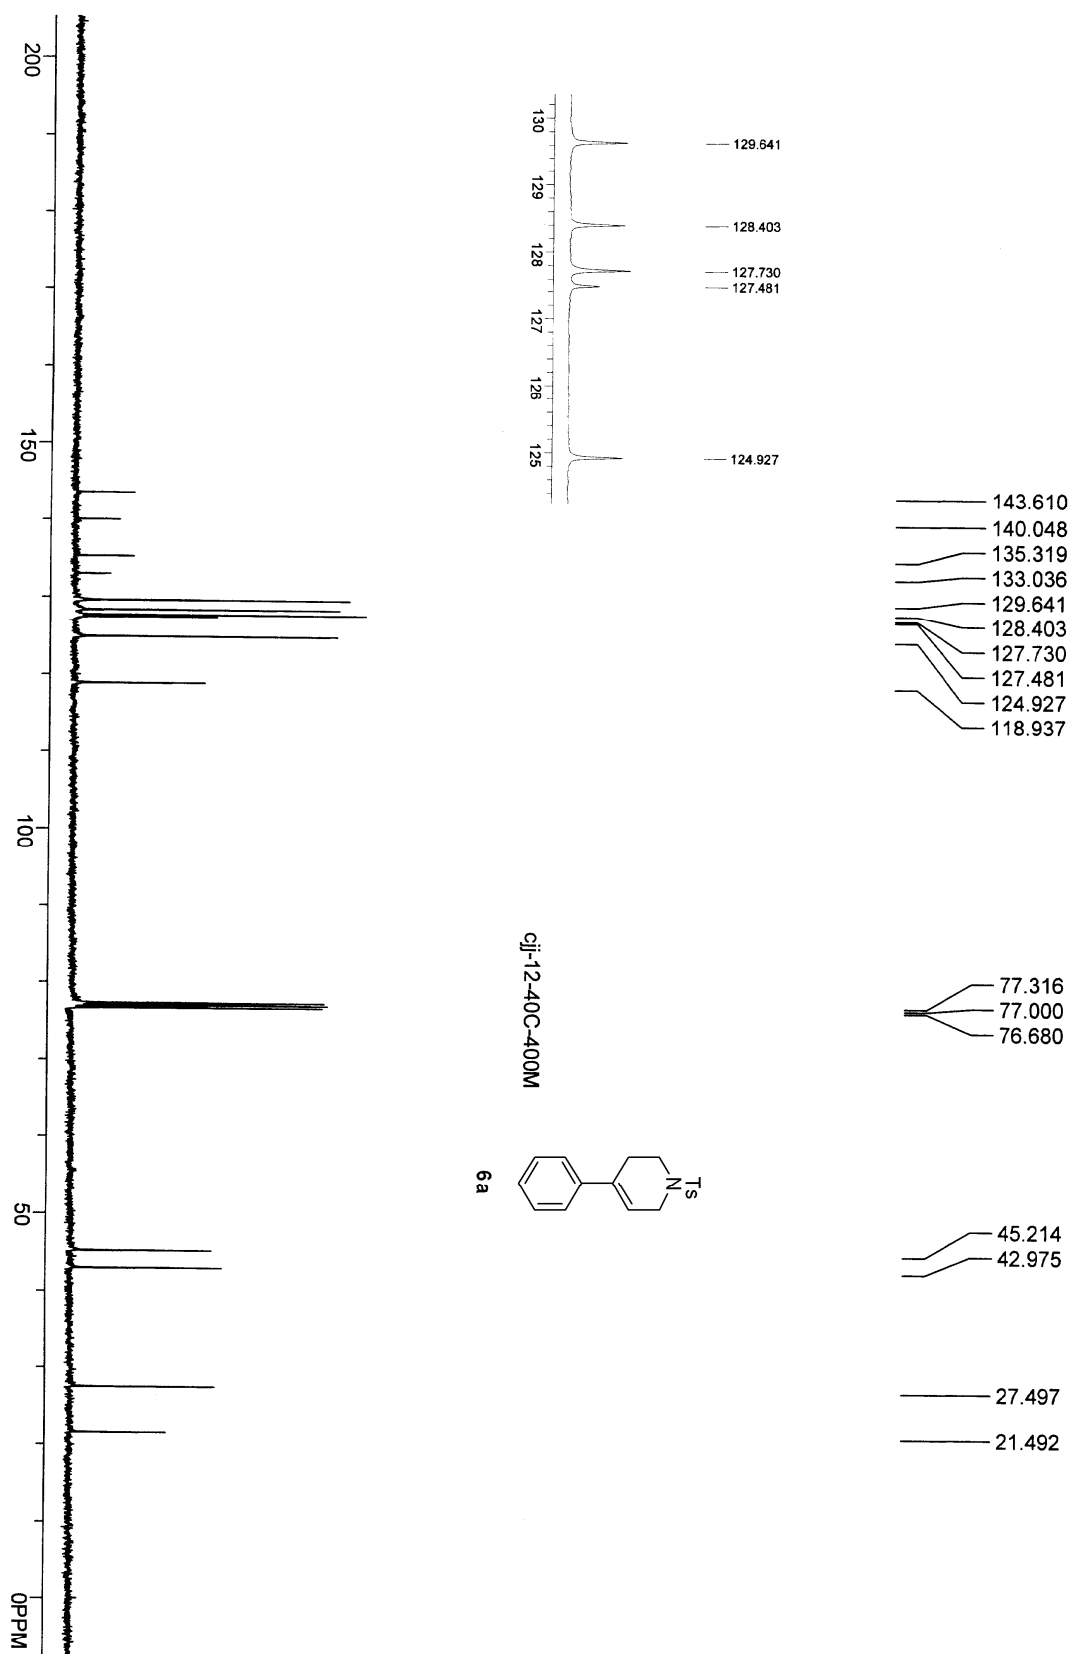

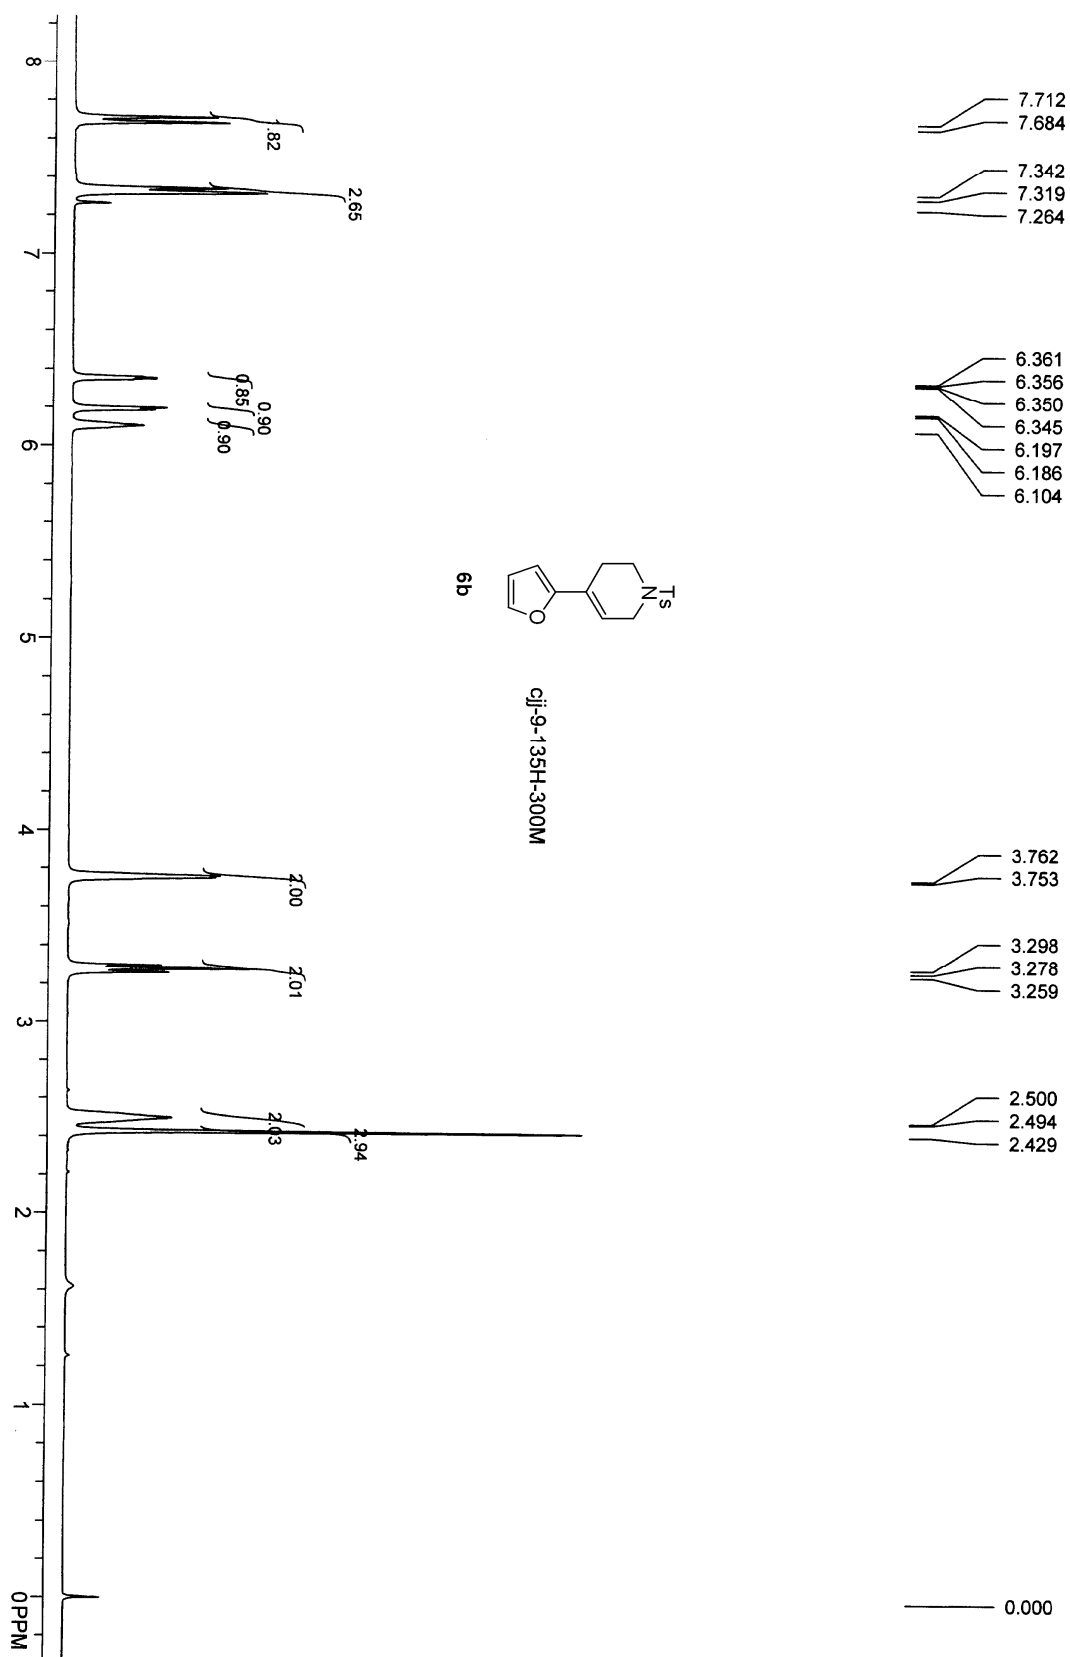

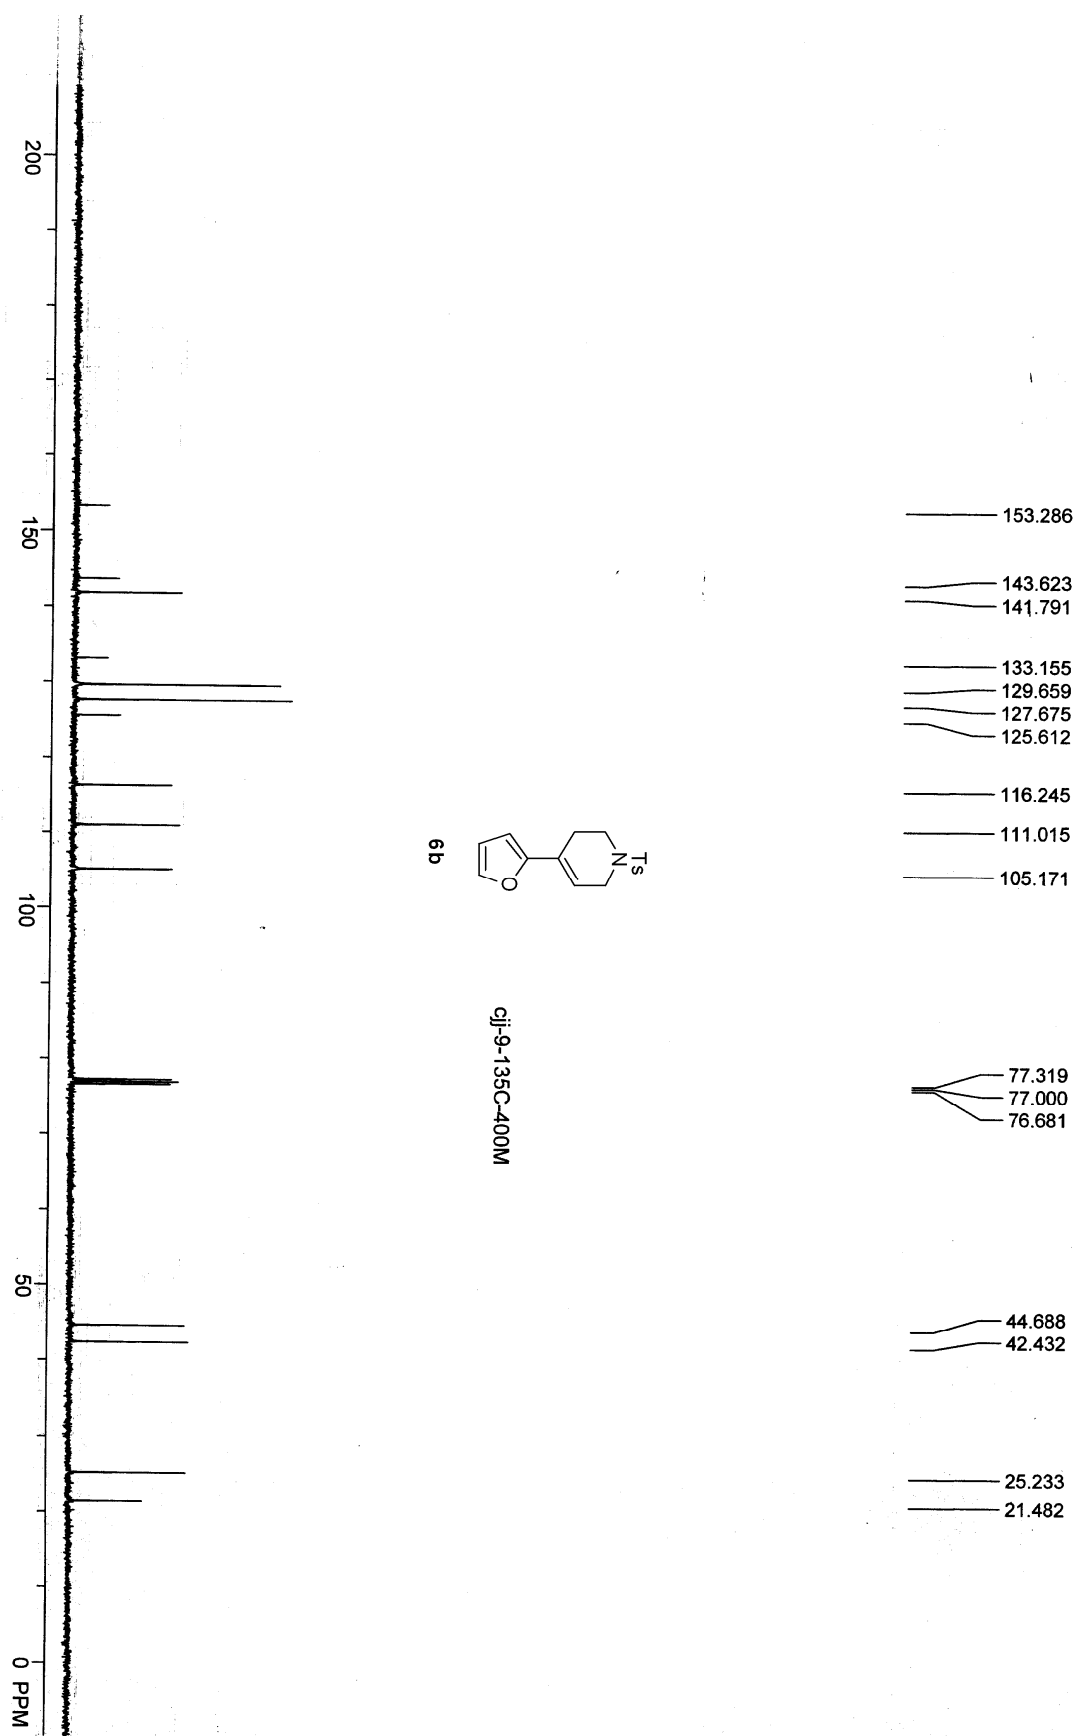

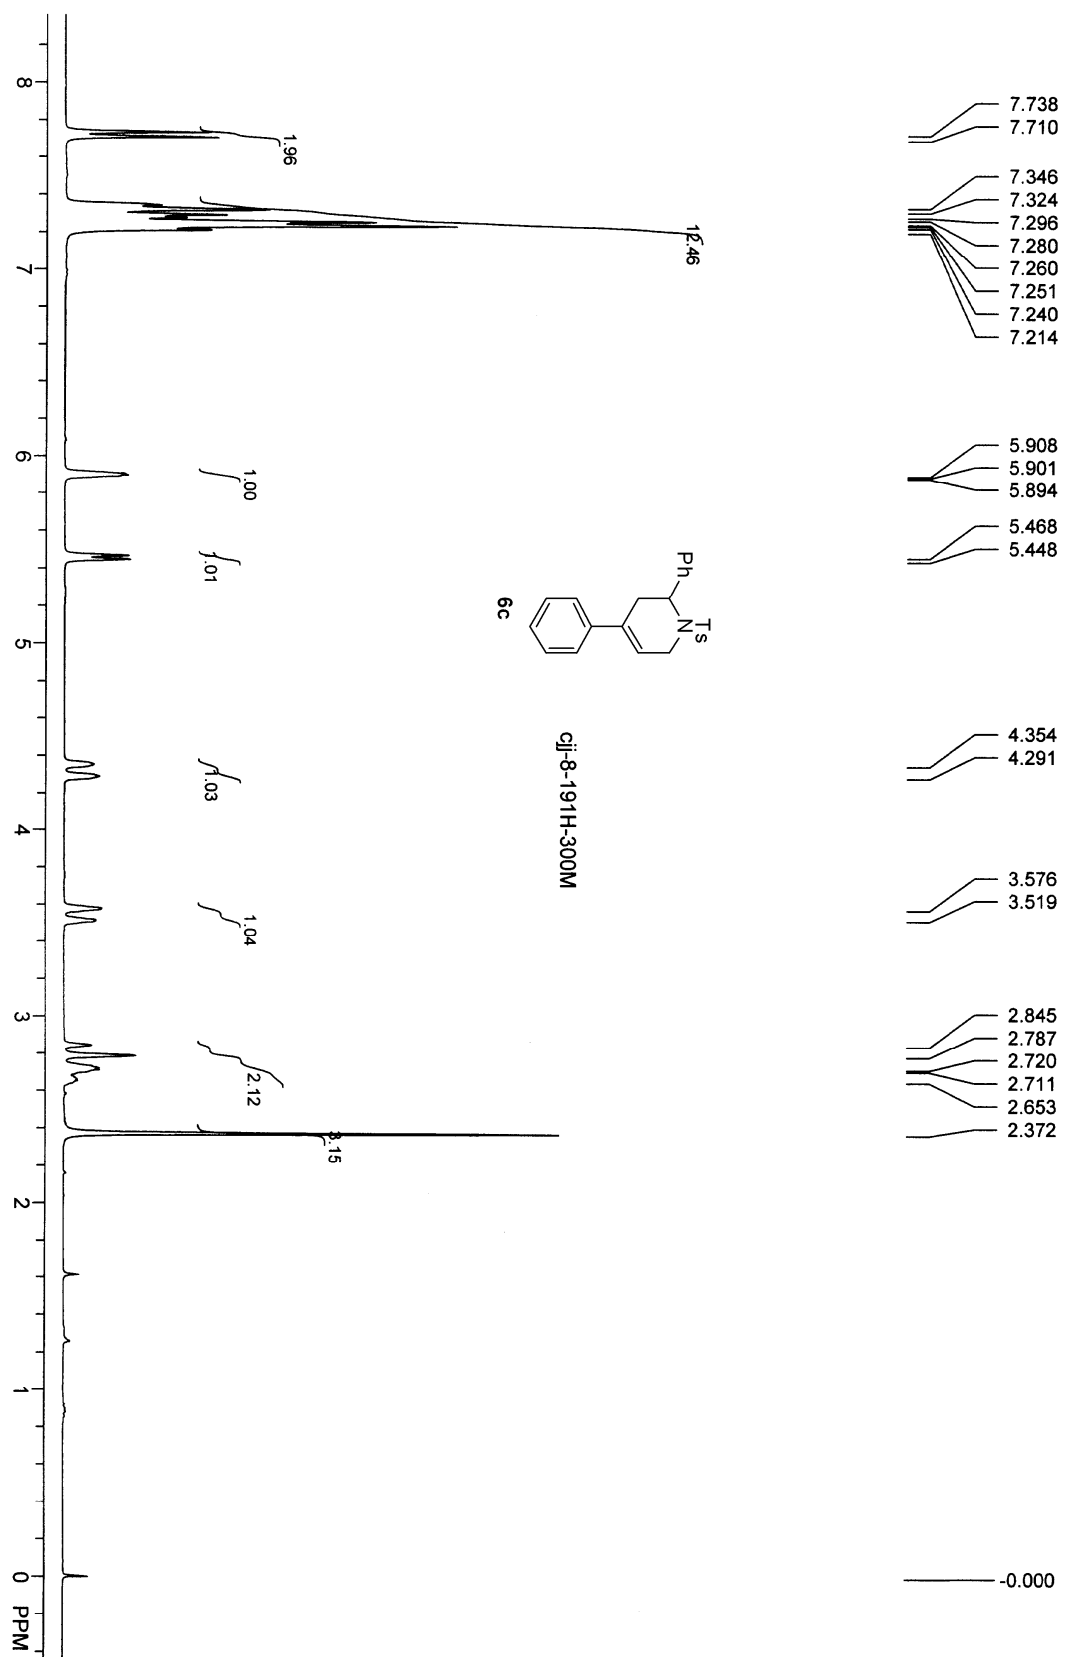

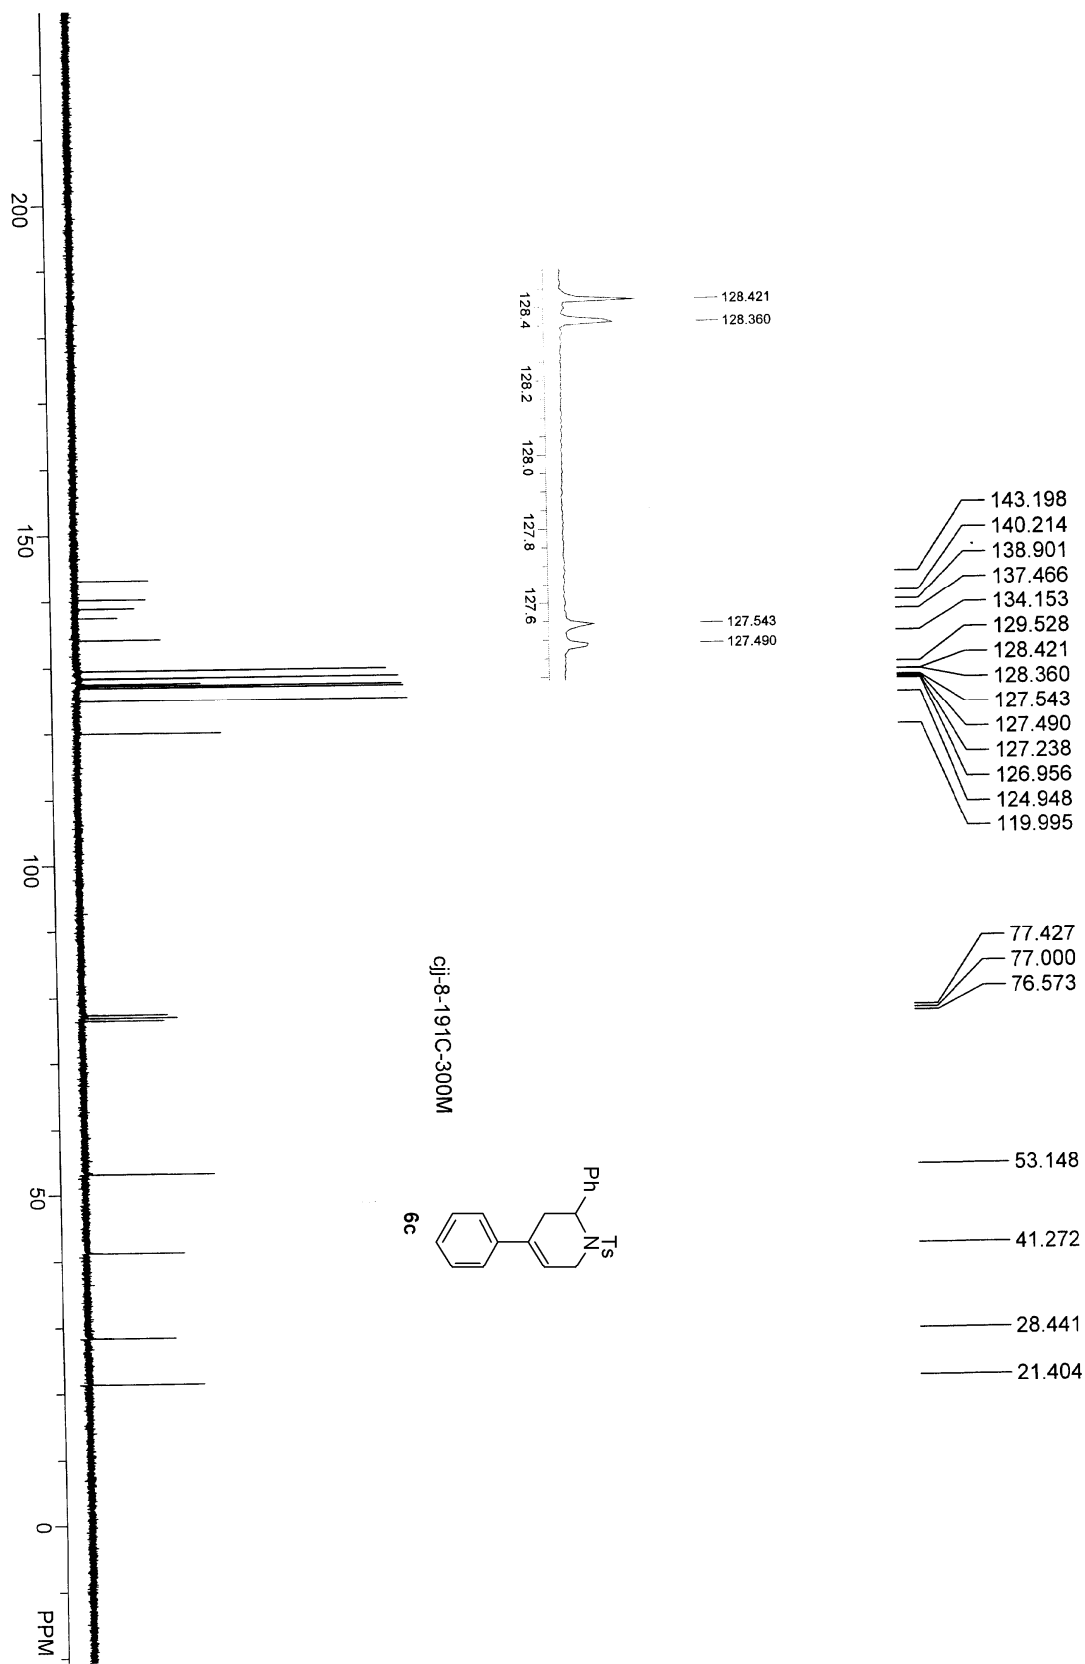

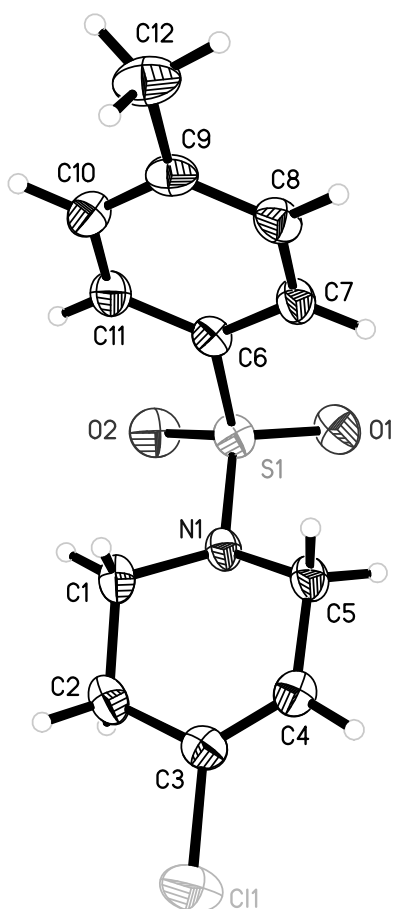

Crystal data for **3j**.  $C_{12}H_{14}ClNO_2S$ , MW = 271.75, monoclinic, space group  $P2(1)/c$ , final R indices [  $I > 2(I)$  ],  $R_1 = 0.0401$ ,  $wR_2 = 0.1023$ , R indices (all data)  $R_1 = 0.0439$ ,  $wR_2 = 0.1062$ ,  $a = 7.7348(5) \text{ \AA}$ ,  $b = 8.2950(5) \text{ \AA}$ ,  $c = 20.1342(13) \text{ \AA}$ ,  $\alpha = 90^\circ$ ,  $\beta = 98.598(1)^\circ$ ,  $\gamma = 90^\circ$ ,  $V = 1277.3(14) \text{ \AA}^3$ ,  $T = 293 \text{ K}$ ,  $Z = 4$ , reflections collected/unique: 7493/2511 ( $R_{\text{int}} = 0.0285$ ), number of observations [  $I > 2(I)$  ] 2253, parameters: 156. Supplementary crystallographic data have been deposited at the Cambridge Crystallographic Data Center (CCDC 880541).

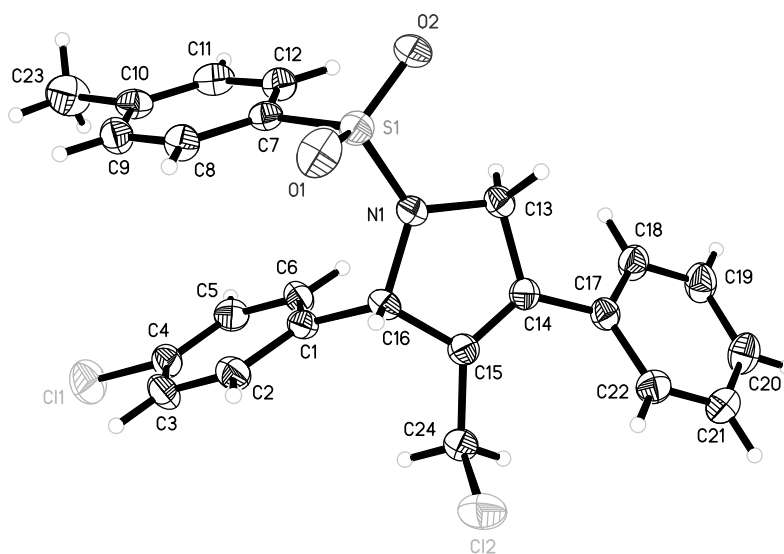

Crystal data for **4a**.  $C_{24}H_{21}Cl_2NO_2S$ , MW = 458.38, monoclinic, space group  $P2(1)/n$ , final R indices [ $I > 2(I)$ ],  $R_1 = 0.0536$ ,  $wR_2 = 0.1300$ , R indices (all data)  $R_1 = 0.0759$ ,  $wR_2 = 0.1405$ ,  $a = 17.918(2) \text{ \AA}$ ,  $b = 5.8464(8) \text{ \AA}$ ,  $c = 21.295(3) \text{ \AA}$ ,  $\alpha = 90^\circ$ ,  $\beta = 99.577(4)^\circ$ ,  $\gamma = 90^\circ$ ,  $V = 2199.7(5) \text{ \AA}^3$ ,  $T = 296 \text{ K}$ ,  $Z = 4$ , reflections collected/unique: 24225/3857 ( $R_{\text{int}} = 0.0603$ ), number of observations [ $I > 2(I)$ ] 2849, parameters:271. Supplementary crystallographic data have been deposited at the Cambridge Crystallographic Data Center (CCDC 880542).
